# Supplementary material for: Rhodium-catalyzed enantioselective hydrogenation of α-amino acrylonitriles: an efficient approach to synthesizing chiral α-amino nitriles
Source: Royal Society of Chemistry journal article supplement (doi:10.1039/c6cc09662j), 2017-01-01
Supplement: c6cc09662j1.pdf [file c6cc09662j1.pdf]

# Rhodium-Catalyzed Enantioselective Hydrogenation of $\alpha$ -amino acrylonitriles: An Efficient Approach to Chiral $\alpha$ -amino nitriles

Xiuxiu Li,<sup>+a</sup> Cai You,<sup>+a</sup> Yusheng Yang,<sup>a</sup> Fangyuan Wang,<sup>a</sup> Shuailong Li,<sup>a</sup> Hui Lv,<sup>\*a</sup> and Xumu Zhang<sup>\*ab</sup>

## Contents

|                                                                       |       |
|-----------------------------------------------------------------------|-------|
| 1 General Information                                                 | 2     |
| 2 General procedure for the synthesis of compound <b>1</b>            | 2     |
| 3 General procedure for asymmetric hydrogenation of compound <b>1</b> | 2-7   |
| 4 NMR spectra of <b>2</b>                                             | 8-23  |
| 5 HPLC spectra of <b>2</b>                                            | 24-55 |

## 1. General Information

Unless otherwise noted, all reagents and solvents were purchased from commercial suppliers and used without further purification. NMR spectra were recorded on Bruker ADVANCE III (400 MHz) spectrometers for  $^1\text{H}$  NMR and  $^{13}\text{C}$  NMR.  $\text{CDCl}_3$  was the solvent used for the NMR analysis, with tetramethylsilane as the internal standard. Chemical shifts were reported upfield to TMS (0.00 ppm) for  $^1\text{H}$  NMR and relative to  $\text{CDCl}_3$  (77.3 ppm) for  $^{13}\text{C}$  NMR. Optical rotation was determined using a Perkin Elmer 343 polarimeter. HPLC analysis was conducted on an Agilent 1260 Series instrument. Column Chromatography was performed with silica gel Merck 60 (300-400 mesh). All new products were further characterized by HRMS. A positive ion mass spectrum of sample was acquired on a Thermo LTQ-FT mass spectrometer with an electrospray ionization source.

## 2. General procedure for the synthesis of compound 1

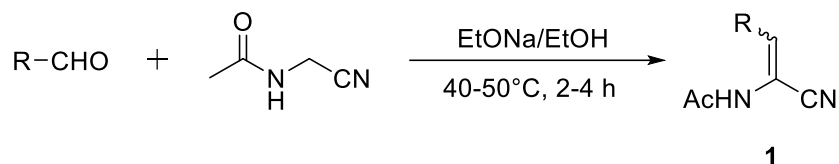

Preparation of **1** according to the literature <sup>[1]</sup>: To a stirred solution of sodium (270 mg, 12 mmol) in ethanol (7.0 mL) was added acetylaminoacetonitrile (980 mg, 10 mmol) at 40-50°C. Five minutes later, aldehyde (10 mmol) was added and the mixture was stirred for another 2-4 h (monitored by TLC). After it was cooled to room temperature, the mixture was poured into water (30 mL), acidified with 3 N aq. HCl and allowed to stand overnight. The precipitate was collected, washed with 20% aq. ethanol (2 x 30 mL). The residue was redissolved in EtOAc, and then dried over sodium sulfate. Removing the solvent by rotary evaporation, the product mixture was purified by flash column chromatography using 20-50% ethyl acetate/hexane to give the desired products (total 55-87% yield).

## 3. General Procedure for Asymmetric Hydrogenation of compound 1

A stock solution was made by mixing  $[\text{Rh}(\text{NBD})_2]\text{BF}_4$  with (*S,S*)-Me-DuPhos in a 1:1.1 molar ratio in trifluoroethanol at room temperature for 30 min in a nitrogen-filled glovebox. An aliquot of the catalyst solution (0.1 mL, 0.001 mmol) was transferred by syringe into the vials charged with different substrates (0.1 mmol for each) in anhydrous trifluoroethanol (1.0 mL). The vials were subsequently transferred into an autoclave into which hydrogen gas was charged. The reaction was then stirred under  $\text{H}_2$  (30 atm) at room temperature for 12 h. The hydrogen gas was released slowly and carefully. The solution was concentrated and passed through a short column of silica gel (eluant: ethyl acetate) to remove the metal complex. The *ee* values of all compounds **2** were determined by HPLC analysis on a chiral stationary phase.

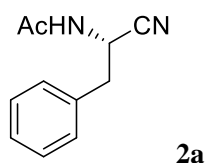

**(S)-N-(1-cyano-2-phenylethyl)acetamide (2a):** White solid; >99% *ee*;  $[\alpha]_{\text{D}}^{25} = -56.0$  ( $c = 0.77$ , EtOH), Lit <sup>[2]</sup>:  $[\alpha]_{\text{D}} = 45.1$  ( $c = 0.78$ , EtOH); The enantiomeric excess was determined by HPLC on Chiralpak AD column, hexane: isopropanol = 95: 5; flow rate = 1.0 mL/min; UV detection at 220 nm;  $t_{\text{R}} = 17.4$  min (major), 18.9 min (minor);  $^1\text{H NMR}$  (400 MHz,  $\text{CDCl}_3$ )  $\delta$  7.39 – 7.31 (m, 3H), 7.29 – 7.24 (m, 2H), 6.56 (d,  $J = 8.2$  Hz, 1H), 5.14-5.08 (m, 1H), 3.18 – 2.96 (m, 2H), 1.97 (s, 3H);  $^{13}\text{C NMR}$  (100 MHz,  $\text{CDCl}_3$ )  $\delta$  170.0, 134.2, 129.6, 129.2, 128.2, 118.5, 41.9, 38.9, 23.0 ppm. **HRMS** calculated  $[\text{M}+\text{H}]^+$  for  $\text{C}_{11}\text{H}_{13}\text{ON}_2 = 189.1022$ , found: 189.1021.

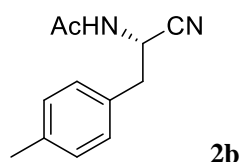

**(S)-N-(1-cyano-2-(p-tolyl)ethyl)acetamide (2b):** White solid; >99% *ee*;  $[\alpha]_{\text{D}}^{25} = -43.8$  ( $c = 0.80$ , EtOH); The enantiomeric excess was determined by HPLC on Chiralpak AD column, hexane: isopropanol = 95: 5; flow rate = 1.0 mL/min; UV detection at 220 nm;  $t_{\text{R}} = 17.0$  min (major), 19.2 min (minor);  $^1\text{H NMR}$  (400 MHz,  $\text{CDCl}_3$ )  $\delta$  7.23 – 7.13 (m, 4H), 6.10 (d,  $J = 8.2$  Hz, 1H), 5.15-5.09 (m, 1H), 3.10-2.97 (m, 2H), 2.35 (s, 3H), 1.98 (s, 3H);  $^{13}\text{C NMR}$  (100 MHz,  $\text{CDCl}_3$ )  $\delta$  169.7, 138.0, 131.0, 130.0, 129.6, 118.5, 41.8, 38.6, 23.1, 21.4 ppm. **HRMS** calculated  $[\text{M}+\text{H}]^+$  for  $\text{C}_{12}\text{H}_{15}\text{ON}_2 = 203.1179$ , found: 203.1177.

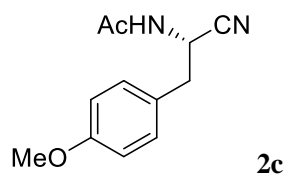

**(S)-N-(1-cyano-2-(4-methoxyphenyl)ethyl)acetamide (2c):** White solid; >99% *ee*;  $[\alpha]_{\text{D}}^{25} = -36.8$  ( $c = 0.85$ , EtOH); The enantiomeric excess was determined by HPLC on Chiralpak AD column, hexane: isopropanol = 95: 5; flow rate = 1.0 mL/min; UV detection at 220 nm;  $t_{\text{R}} = 26.2$  min (major), 30.0 min (minor).  $^1\text{H NMR}$  (400 MHz,  $\text{CDCl}_3$ )  $\delta$  7.20 (d,  $J = 8.6$  Hz, 2H), 6.93 – 6.85 (m, 2H), 6.16 (d,  $J = 8.1$  Hz, 1H), 5.12-5.07 (m, 1H), 3.80 (s, 3H), 3.08-2.95 (m, 2H), 1.99 (s, 3H);  $^{13}\text{C NMR}$  (100 MHz,  $\text{CDCl}_3$ )  $\delta$  169.7, 159.5, 130.8, 126.0, 118.5, 114.7, 55.6, 42.0, 38.2, 23.1 ppm. **HRMS** calculated  $[\text{M}+\text{H}]^+$  for  $\text{C}_{12}\text{H}_{15}\text{O}_2\text{N}_2 = 219.1128$ , found: 219.1127.

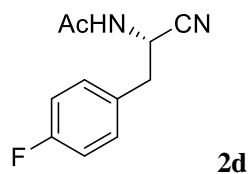

**(S)-N-(1-cyano-2-(4-fluorophenyl)ethyl)acetamide (2d):** White solid; >99% *ee*;  $[\alpha]_{\text{D}}^{25} = -43.9$  ( $c = 0.35$ , EtOH); The enantiomeric excess was determined by HPLC on Chiralpak AD column, hexane: isopropanol = 95: 5; flow rate = 1.0 mL/min; UV detection at 220 nm;  $t_{\text{R}} = 19.2$  min (major), 20.0 min (minor);  $^1\text{H NMR}$  (400 MHz,  $\text{CDCl}_3$ )  $\delta$  7.28 – 7.23 (m, 2H), 7.10-7.03 (m, 2H), 6.13 (d,  $J = 8.0$  Hz, 1H), 5.14-5.09 (m, 1H), 3.11-3.00 (m, 2H), 2.00 (s, 3H);  $^{13}\text{C NMR}$  (101 MHz,  $\text{CDCl}_3$ )  $\delta$  169.7, 164.0, 161.5, 131.4, 131.3, 129.9, 129.9, 118.3, 116.4, 116.1, 41.9, 38.3, 23.1 ppm. **HRMS** calculated

$[M+H]^+$  for  $C_{11}H_{12}ON_2F$  = 207.0928, found: 207.0926.

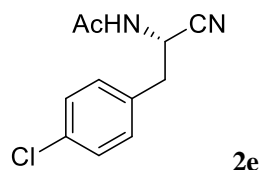

**(S)-N-(2-(4-chlorophenyl)-1-cyanoethyl)acetamide (2e):** White solid; >99% *ee*;  $[\alpha]_D^{25} = -32.6$  ( $c = 0.67$ , EtOH); The enantiomeric excess was determined by HPLC on Chiralpak AD column, hexane: isopropanol = 93:7; flow rate = 0.5 mL/min; UV detection at 220 nm;  $t_R = 26.4$  min (major), 36.1 min (minor);  $^1H$  NMR (400 MHz,  $CDCl_3$ )  $\delta$  7.36 (d,  $J = 8.4$  Hz, 2H), 7.23 (d,  $J = 8.4$  Hz, 2H), 5.86 (d,  $J = 8.3$  Hz, 1H), 5.20-5.12 (m, 1H), 3.12-3.00 (m, 2H), 2.01 (s, 3H);  $^{13}C$  NMR (100 MHz,  $CDCl_3$ )  $\delta$  169.5, 134.4, 132.5, 131.1, 129.5, 118.1, 41.6, 38.5, 23.1 ppm. **HRMS** calculated  $[M+H]^+$  for  $C_{11}H_{12}ON_2Cl$  = 223.0633, found: 223.0630.

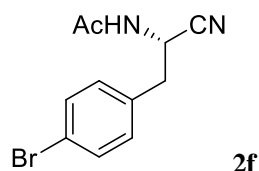

**(S)-N-(2-(4-bromophenyl)-1-cyanoethyl)acetamide (2f):** White solid; >99% *ee*;  $[\alpha]_D^{25} = -29.9$  ( $c = 0.73$ , EtOH); The enantiomeric excess was determined by HPLC on Chiralpak AD column, hexane: isopropanol = 93:7; flow rate = 0.6 mL/min; UV detection at 220 nm;  $t_R = 23.2$  min (major), 31.7 min (minor);  $^1H$  NMR (400 MHz,  $CDCl_3$ )  $\delta$  7.36 (d,  $J = 8.4$  Hz, 2H), 7.23 (d,  $J = 8.4$  Hz, 2H), 5.86 (d,  $J = 8.3$  Hz, 1H), 5.20-5.12 (m, 1H), 3.12-2.99 (m, 2H), 2.01 (s, 3H);  $^{13}C$  NMR (100 MHz,  $CDCl_3$ )  $\delta$  169.6, 133.1, 132.4, 131.4, 122.4, 118.1, 41.6, 38.5, 23.1 ppm. **HRMS** calculated  $[M+H]^+$  for  $C_{11}H_{12}ON_2Br$  = 267.0128, found: 267.0125.

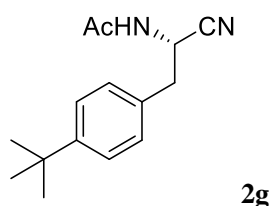

**(S)-N-(2-(4-(tert-butyl)phenyl)-1-cyanoethyl)acetamide (2g):** Yellow oil; 95% *ee*;  $[\alpha]_D^{25} = -23.7$  ( $c = 0.83$ , EtOH); The enantiomeric excess was determined by HPLC on Chiralpak AD column, hexane: isopropanol = 95: 5; flow rate = 1.0 mL/min; UV detection at 220 nm;  $t_R = 11.0$  min (major), 12.8 min (minor);  $^1H$  NMR (400 MHz,  $CDCl_3$ )  $\delta$  7.43 – 7.34 (m, 2H), 7.23-7.19 (m, 2H), 6.20 (d,  $J = 8.4$  Hz, 1H), 5.17-5.10 (m, 1H), 3.12-2.98 (m, 2H), 1.99 (s, 3H), 1.31 (s, 9H);  $^{13}C$  NMR (100 MHz,  $CDCl_3$ )  $\delta$  169.7, 151.2, 131.0, 129.4, 126.2, 118.6, 41.8, 38.4, 34.8, 31.5, 23.1 ppm. **HRMS** calculated  $[M+H]^+$  for  $C_{15}H_{21}ON_2$  = 245.1648, found: 245.1645.

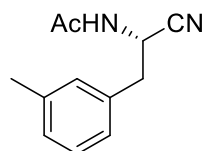

**2h**

**(S)-N-(1-cyano-2-(m-tolyl)ethyl)acetamide (2h):** White solid; >99% *ee*;  $[\alpha]_{\text{D}}^{25} = -53.1$  ( $c = 0.47$ , EtOH); The enantiomeric excess was determined by HPLC on Chiralpak AD column, hexane: isopropanol = 95: 5; flow rate = 1.0 mL/min; UV detection at 220 nm;  $t_{\text{R}} = 18.4$  min (major), 20.5 min (minor);  $^1\text{H NMR}$  (400 MHz,  $\text{CDCl}_3$ )  $\delta$  7.28-7.23 (m, 1H), 7.17 – 7.04 (m, 3H), 6.42 – 6.18 (m, 1H), 5.14-5.09 (m, 1H), 3.11-2.97 (m, 2H), 2.36 (s, 3H), 1.99 (s, 3H);  $^{13}\text{C NMR}$  (100 MHz,  $\text{CDCl}_3$ )  $\delta$  169.8, 139.0, 134.1, 134.0, 129.1, 129.0, 126.7, 118.5, 41.8, 38.9, 23.0, 21.6 ppm. **HRMS** calculated  $[\text{M}+\text{H}]^+$  for  $\text{C}_{12}\text{H}_{15}\text{ON}_2 = 203.1179$ , found: 203.1177.

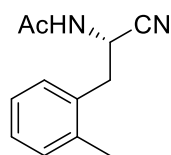

**2i**

**(S)-N-(1-cyano-2-(o-tolyl)ethyl)acetamide (2i):** White solid; >99% *ee*;  $[\alpha]_{\text{D}}^{25} = -47.1$  ( $c = 0.33$ , EtOH); The enantiomeric excess was determined by HPLC on Chiralpak AD column, hexane: isopropanol = 97:3; flow rate = 0.5 mL/min; UV detection at 220 nm;  $t_{\text{R}} = 62.0$  min (minor), 65.5 min (major);  $^1\text{H NMR}$  (400 MHz,  $\text{CDCl}_3$ )  $\delta$  7.26 – 7.16 (m, 4H), 6.19 (s, 1H), 5.15-5.09(m, 1H), 3.12 (d,  $J = 7.3$  Hz, 2H), 2.38 (s, 3H), 2.00 (s, 3H);  $^{13}\text{C NMR}$  (100 MHz,  $\text{CDCl}_3$ )  $\delta$  169.7, 137.0, 132.5, 131.2, 130.4, 128.3, 126.7, 118.6, 100.2, 41.2, 36.5, 23.1, 19.7 ppm. **HRMS** calculated  $[\text{M}+\text{H}]^+$  for  $\text{C}_{12}\text{H}_{15}\text{ON}_2 = 203.1179$ , found: 203.1178.

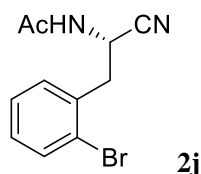

**2j**

**(S)-N-(2-(2-bromophenyl)-1-cyanoethyl)acetamide (2j):** White solid; 98% *ee*;  $[\alpha]_{\text{D}}^{25} = -38.1$  ( $c = 0.69$ , EtOH); The enantiomeric excess was determined by HPLC on Chiralpak AD column, hexane: isopropanol = 95: 5; flow rate = 1.0 mL/min; UV detection at 220 nm;  $t_{\text{R}} = 24.4$  min (major), 26.3 min (minor);  $^1\text{H NMR}$  (400 MHz,  $\text{CDCl}_3$ )  $\delta$  7.56 (dd,  $J = 8.0, 1.1$  Hz, 1H), 7.41 – 7.26 (m, 3H), 7.21 – 7.12 (m, 1H), 5.15 (q,  $J = 7.8$  Hz, 1H), 3.34-3.22 (m, 2H), 1.97 (s, 3H);  $^{13}\text{C NMR}$  (100 MHz,  $\text{CDCl}_3$ )  $\delta$  170.4, 133.9, 133.2, 131.8, 129.7, 128.0, 124.7, 118.1, 40.6, 38.7, 22.8 ppm. **HRMS** calculated  $[\text{M}+\text{H}]^+$  for  $\text{C}_{11}\text{H}_{12}\text{ON}_2\text{Br} = 267.0128$ , found: 267.0125.

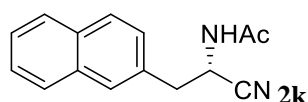

**2k**

**(S)-N-(1-cyano-2-(naphthalen-2-yl)ethyl)acetamide (2k):** White solid; >99% *ee*;  $[\alpha]_{\text{D}}^{25} = -34.5$  ( $c = 0.67$ , EtOH); The enantiomeric excess was determined by HPLC on Chiralpak AD column, hexane: isopropanol = 95: 5; flow rate = 1.0 mL/min; UV detection at 220 nm;  $t_{\text{R}} = 24.2$  min (major), 28.3 min (minor);  $^1\text{H NMR}$  (400 MHz,  $\text{CDCl}_3$ )  $\delta$  7.85-7.80 (m, 3H), 7.71 (s, 1H), 7.51-7.47 (m, 2H),

7.37 (d,  $J = 8.4$  Hz, 1H), 6.35 (d,  $J = 8.3$  Hz, 1H), 5.22-5.17(m, 1H), 3.27-3.14 (m, 2H), 1.93 (s, 3H);  $^{13}\text{C}$  NMR (100 MHz,  $\text{CDCl}_3$ )  $\delta$  169.9, 133.6, 133.0, 131.6, 129.1, 128.8, 128.0, 127.3, 126.8, 126.5, 118.5, 41.8, 39.1, 23.0 ppm. **HRMS** calculated  $[\text{M}+\text{H}]^+$  for  $\text{C}_{15}\text{H}_{15}\text{ON}_2 = 239.1179$ , found: 239.1176.

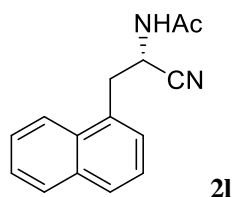

**(S)-N-(1-cyano-2-(naphthalen-1-yl)ethyl)acetamide (2l):** Yellow solid; 93% *ee*;  $[\alpha]_{\text{D}}^{25} = -30.1$  ( $c = 0.71$ , EtOH); The enantiomeric excess was determined by HPLC on Chiralpak AD column, hexane: isopropanol = 95: 5; flow rate = 1.0 mL/min; UV detection at 220 nm;  $t_{\text{R}} = 18.9$  min (major), 21.3 min (minor);  $^1\text{H}$  NMR (400 MHz,  $\text{CDCl}_3$ )  $\delta$  8.05 (d,  $J = 8.4$  Hz, 1H), 7.88 (d,  $J = 7.9$  Hz, 1H), 7.85 – 7.80 (m, 1H), 7.59 – 7.49 (m, 2H), 7.48 – 7.41 (m, 2H), 6.39 (d,  $J = 8.1$  Hz, 1H), 5.32-5.24 (m, 1H), 3.64-3.45 (m, 2H), 1.94 (s, 3H);  $^{13}\text{C}$  NMR (100 MHz,  $\text{CDCl}_3$ )  $\delta$  167.0, 134.2, 132.0, 130.3, 129.4, 129.1, 128.6, 127.1, 126.3, 125.8, 123.2, 118.4, 41.9, 36.3, 23.0 ppm. **HRMS** calculated  $[\text{M}+\text{H}]^+$  for  $\text{C}_{15}\text{H}_{15}\text{ON}_2 = 239.1179$ , found: 239.1176.

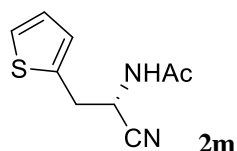

**(S)-N-(1-cyano-2-(thiophen-2-yl)ethyl)acetamide (2m):** White solid; >99% *ee*;  $[\alpha]_{\text{D}}^{25} = -36.9$  ( $c = 0.57$ , EtOH); The enantiomeric excess was determined by HPLC on Chiralpak AD column, hexane: isopropanol = 94:6; flow rate = 0.6 mL/min; UV detection at 220 nm;  $t_{\text{R}} = 26.1$  min (major), 27.8 min (minor);  $^1\text{H}$  NMR (400 MHz,  $\text{CDCl}_3$ )  $\delta$  7.29 – 7.26 (m, 1H), 7.09 – 6.99 (m, 2H), 6.39 (s, 1H), 5.18-5.11 (m, 1H), 3.41 – 3.22 (m, 2H), 2.01 (s, 3H);  $^{13}\text{C}$  NMR (101 MHz,  $\text{CDCl}_3$ )  $\delta$  169.8, 135.4, 128.0, 127.8, 126.0, 118.2, 41.8, 33.2, 23.1 ppm. **HRMS** calculated  $[\text{M}+\text{H}]^+$  for  $\text{C}_9\text{H}_{11}\text{ON}_2\text{S} = 195.0587$ , found: 195.0586.

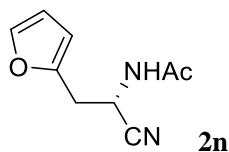

**(S)-N-(1-cyano-2-(furan-2-yl)ethyl)acetamide (2n):** colorless oil; >99% *ee*;  $[\alpha]_{\text{D}}^{25} = -19.2$  ( $c = 0.31$ , EtOH); The enantiomeric excess was determined by HPLC on Chiralpak AD column, hexane: isopropanol = 95: 5; flow rate = 1.0 mL/min; UV detection at 220 nm;  $t_{\text{R}} = 19.8$  min (major), 24.1 min (minor);  $^1\text{H}$  NMR (400 MHz,  $\text{CDCl}_3$ )  $\delta$  7.41 (d,  $J = 1.7$  Hz, 1H), 6.39-6.36 (m, 1H), 6.30 (d,  $J = 3.2$  Hz, 1H), 6.12 (d,  $J = 7.3$  Hz, 1H), 5.21-5.16 (m, 1H), 3.18-3.14 (m, 2H), 2.04 (s, 3H);  $^{13}\text{C}$  NMR (101 MHz,  $\text{CDCl}_3$ )  $\delta$  169.6, 148.6, 143.2, 117.9, 111.1, 109.5, 40.2, 31.7, 23.2 ppm. **HRMS** calculated  $[\text{M}+\text{H}]^+$  for  $\text{C}_9\text{H}_{11}\text{O}_2\text{N}_2 = 179.0815$ , found: 179.0813.

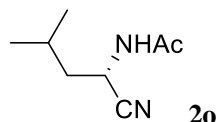

**(S)-N-(1-cyano-3-methylbutyl)acetamide (2o):** colorless oil; 97% *ee*;  $[\alpha]_{\text{D}}^{25} = -36.5$  ( $c = 0.46$ , EtOH); The enantiomeric excess was determined by HPLC on Chiralpak OJ column, hexane: isopropanol = 95: 5; flow rate = 1.0 mL/min; UV detection at 210 nm;  $t_{\text{R}} = 11.6$  min (minor), 13.5 min (major);  $^1\text{H NMR}$  (400 MHz,  $\text{CDCl}_3$ )  $\delta$  6.02 (d,  $J = 7.6$  Hz, 1H), 4.92 (q,  $J = 8.2$  Hz, 1H), 2.04 (s, 3H), 1.86-1.71 (m, 2H), 1.67-1.60 (m, 1H), 0.98 (dd,  $J = 6.5, 1.9$  Hz, 6H);  $^{13}\text{C NMR}$  (100 MHz,  $\text{CDCl}_3$ )  $\delta$  169.7, 119.1, 42.1, 39.2, 25.1, 23.1, 22.5, 22.1 ppm. **HRMS** calculated  $[\text{M}+\text{H}]^+$  for  $\text{C}_8\text{H}_{15}\text{ON}_2 = 155.1179$ , found: 155.1177.

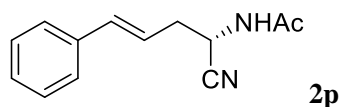

**(S,E)-N-(1-cyano-4-phenylbut-3-en-1-yl)acetamide (2p):** Yellow solid; >99% *ee*;  $[\alpha]_{\text{D}}^{25} = -13.6$  ( $c = 0.70$ , EtOH); The enantiomeric excess was determined by HPLC on Chiralpak AD column, hexane: isopropanol = 95: 5; flow rate = 1.0 mL/min; UV detection at 220 nm;  $t_{\text{R}} = 18.5$  min (major), 20.1 min (minor);  $^1\text{H NMR}$  (400 MHz,  $\text{CDCl}_3$ )  $\delta$  7.42 – 7.25 (m, 6H), 6.59 (d,  $J = 15.8$  Hz, 1H), 6.26 – 6.11 (m, 2H), 5.07-5.01 (m, 1H), 2.80 – 2.60 (m, 2H), 2.02 (s, 3H);  $^{13}\text{C NMR}$  (100 MHz,  $\text{CDCl}_3$ )  $\delta$  180.8, 169.8, 136.3, 136.3, 129.0, 128.4, 126.7, 121.5, 118.5, 40.4, 36.7, 23.1 ppm. **HRMS** calculated  $[\text{M}+\text{H}]^+$  for  $\text{C}_{13}\text{H}_{15}\text{ON}_2 = 215.1179$ , found: 215.1178.

## References

1. P. Zeng, Y. Hu, H. Hu. *Synth. Commun.*, **1995**, 25, 1167-1172;
2. R. S. Atkinson, M. P. Coogan, I. S. T. Lochrie. *J. Chem. Soc., Perkin Trans. 1*, **1997**, 897-900.

#### 4. NMR spectra of 2

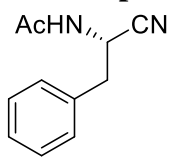

7.38, 7.37, 7.37, 7.36, 7.36, 7.35, 7.35, 7.34, 7.34, 7.33, 7.33, 7.32, 7.29, 7.27, 7.26, 6.57, 6.55, 5.14, 5.12, 5.12, 5.11, 5.10, 5.10, 5.10, 5.08, 3.13, 3.11, 3.09, 3.07, 3.05, 3.04, 3.02, -1.97

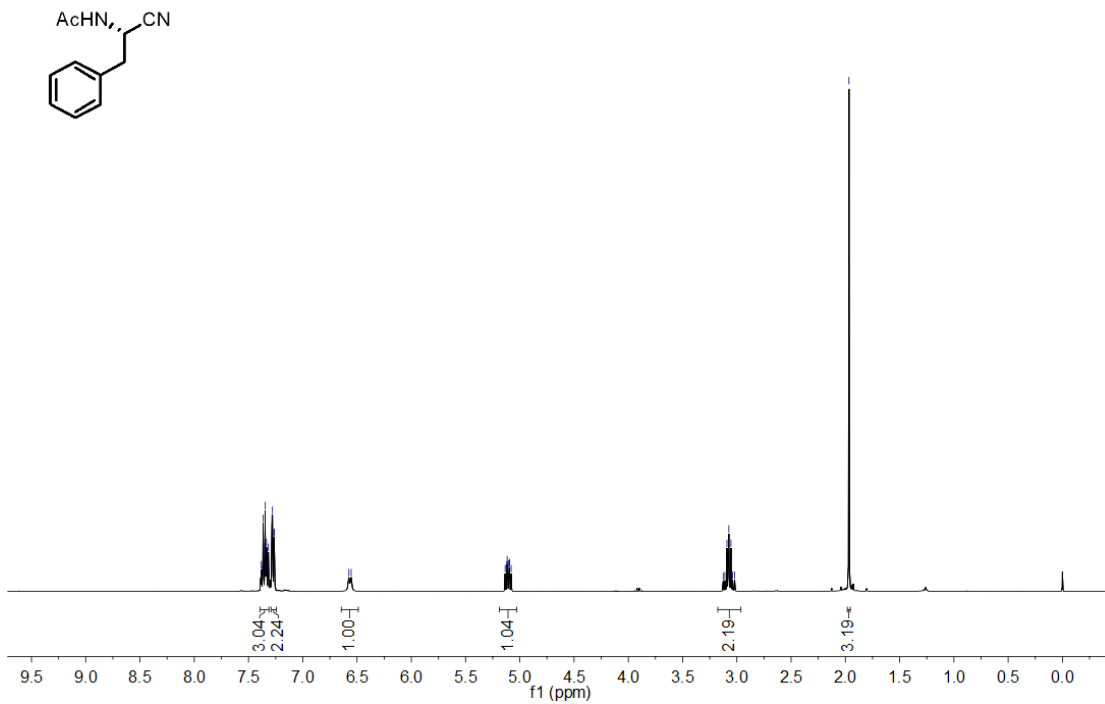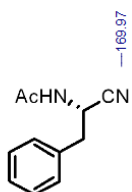

169.97, 134.23, 129.65, 129.21, 128.15, 118.48, 41.87, 38.93, 22.97

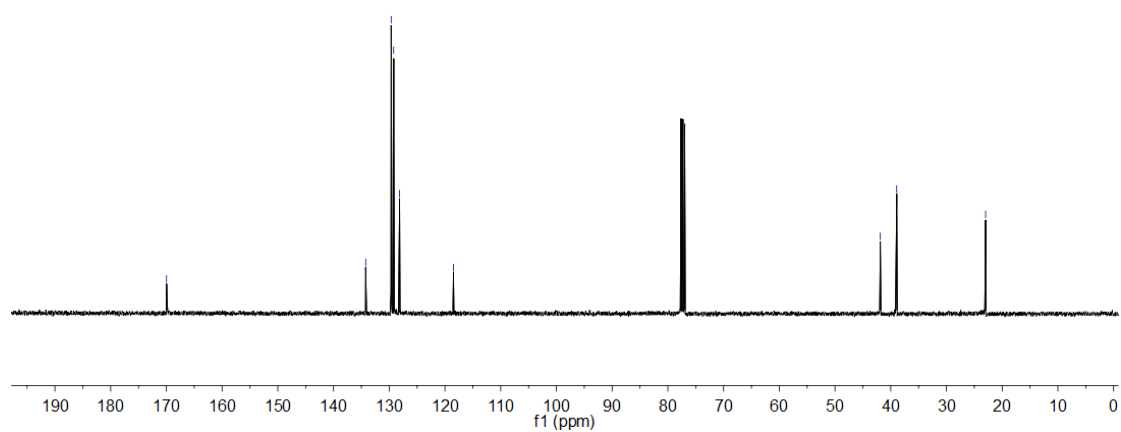



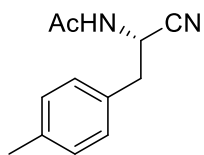

**2b**

7.19  
7.17  
7.16  
7.15

6.11  
6.09

5.15  
5.13  
5.13  
5.11  
5.11  
5.09

3.10  
3.08  
3.06  
3.05  
3.02  
3.00  
2.99  
2.97  
-2.95  
-1.98

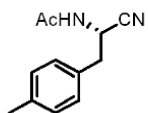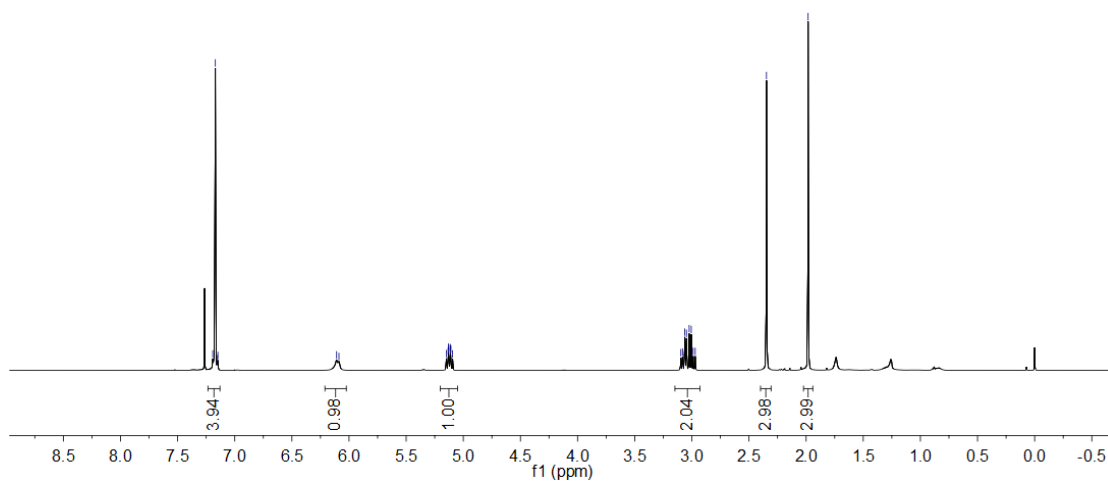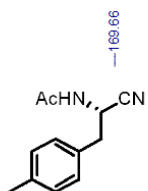

169.66

137.99  
136.97  
129.97  
129.58

118.50

41.82  
38.56

23.07  
21.37

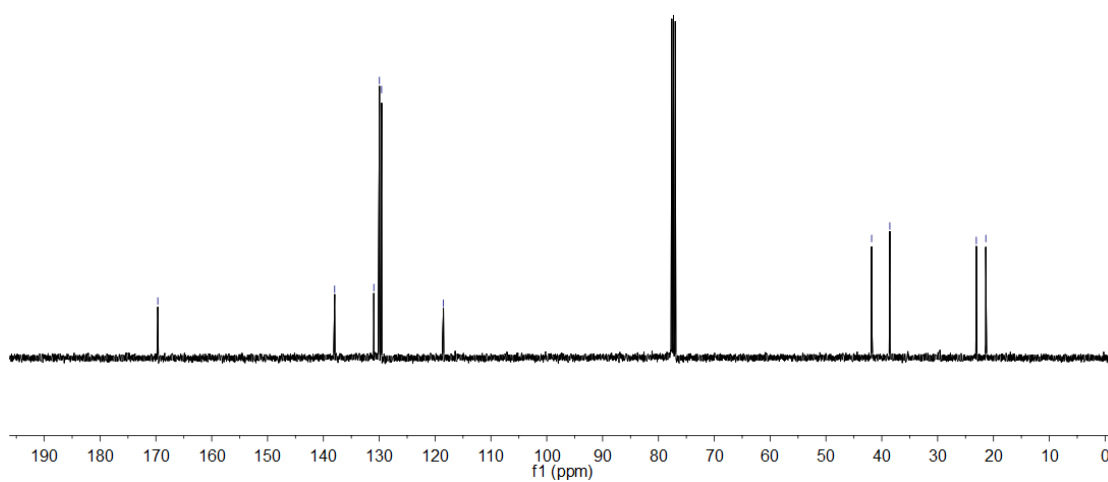

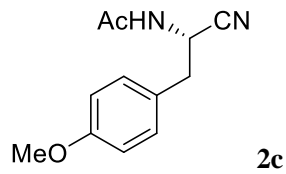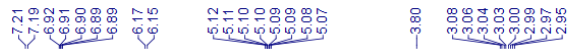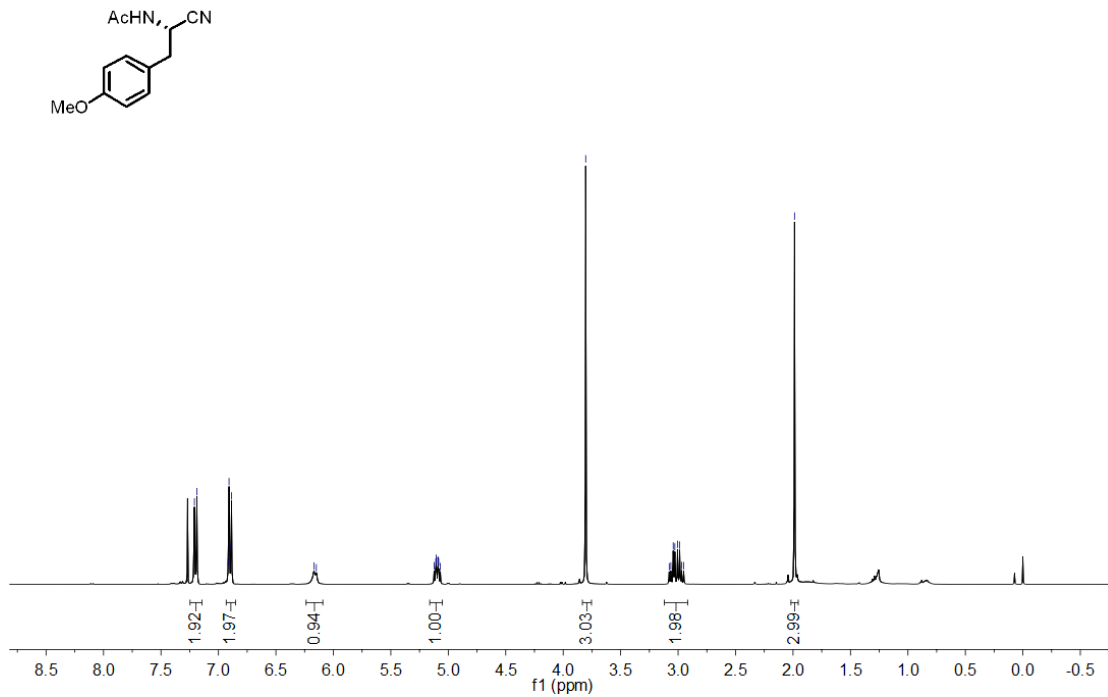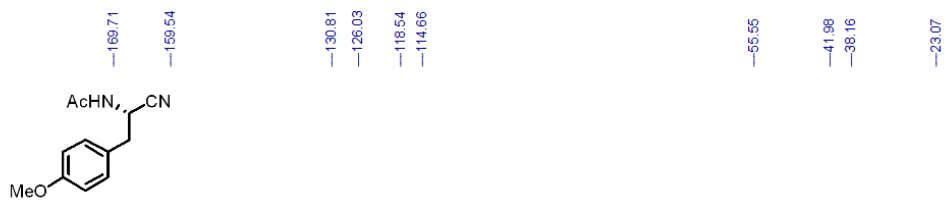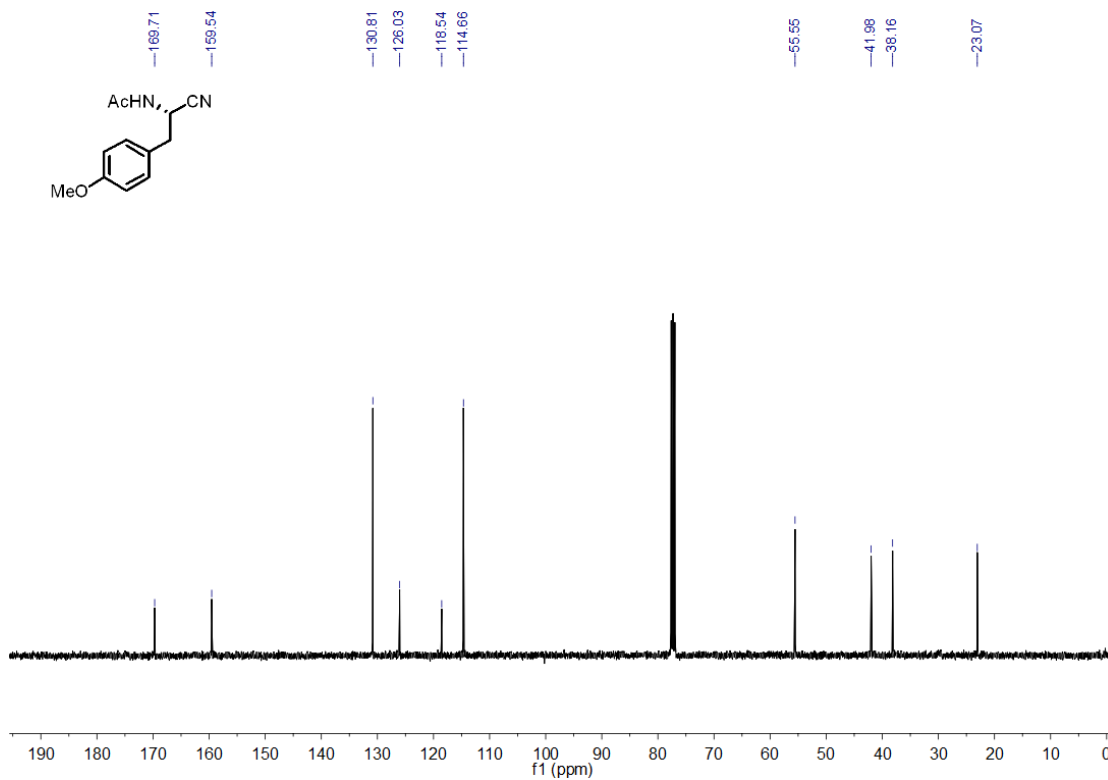

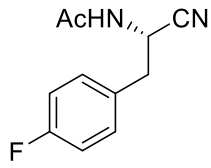

2d

7.27, 7.27, 7.26, 7.25, 7.04, 7.06, 7.04, 6.14, 6.12, 5.15, 5.14, 5.13, 5.12, 5.11, 5.10, 3.11, 3.10, 3.08, 3.06, 3.05, 3.02, 3.00, -2.00

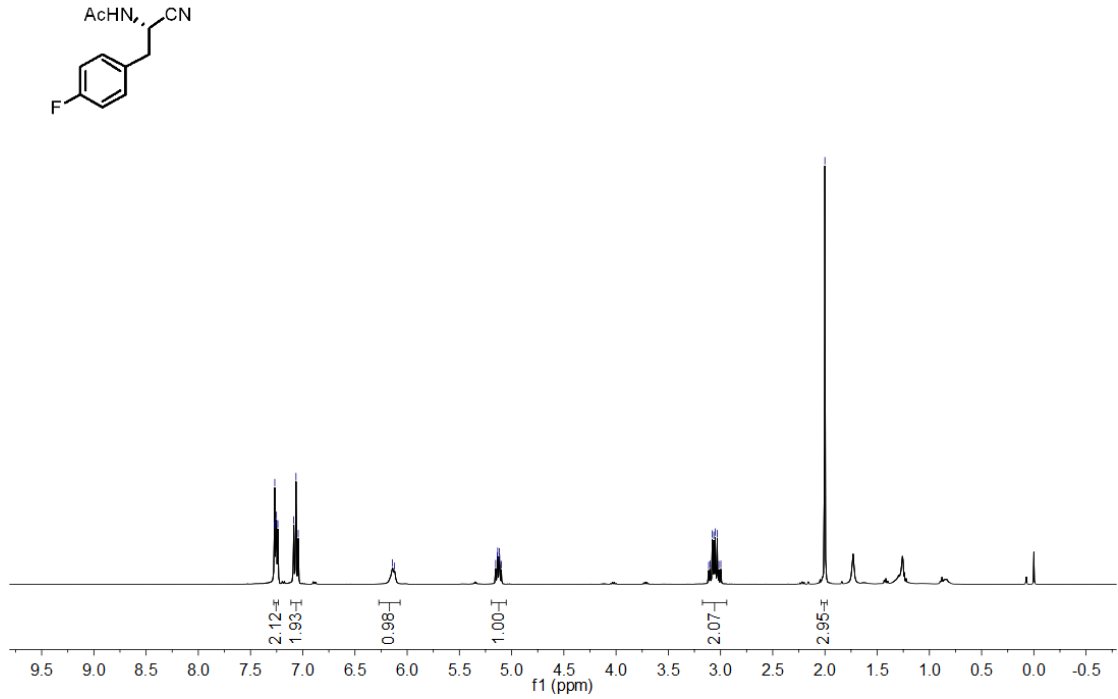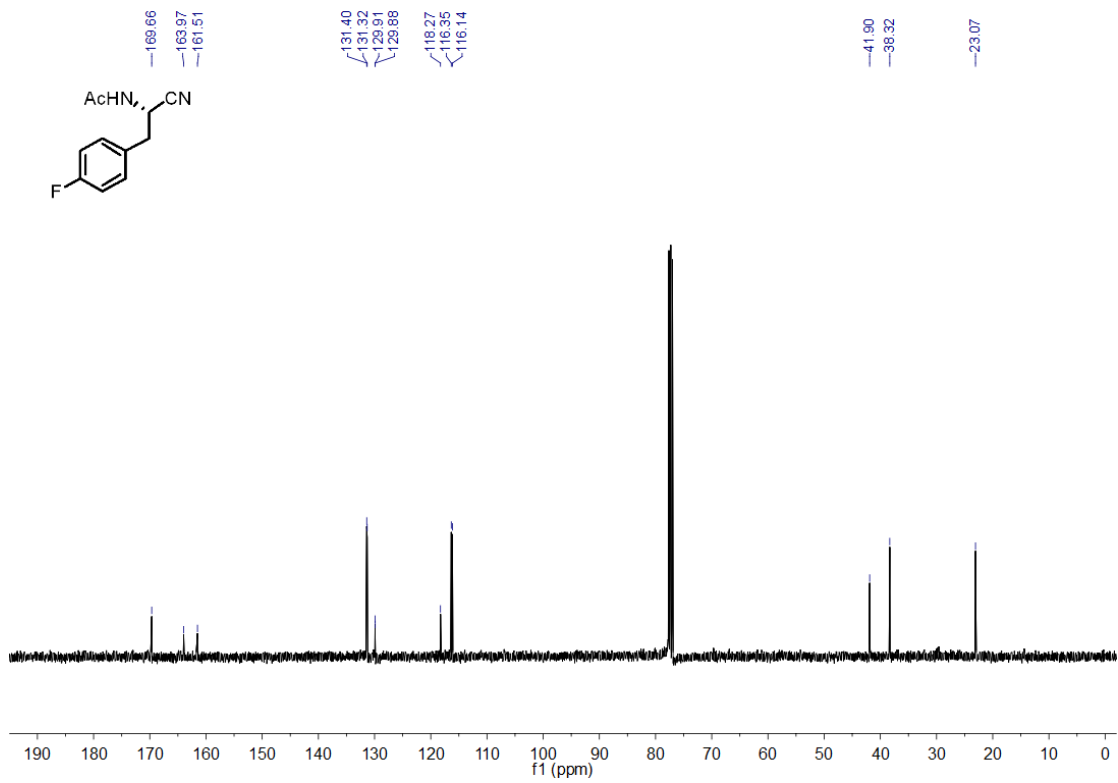

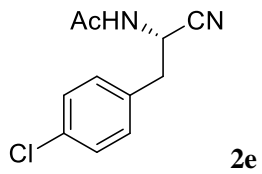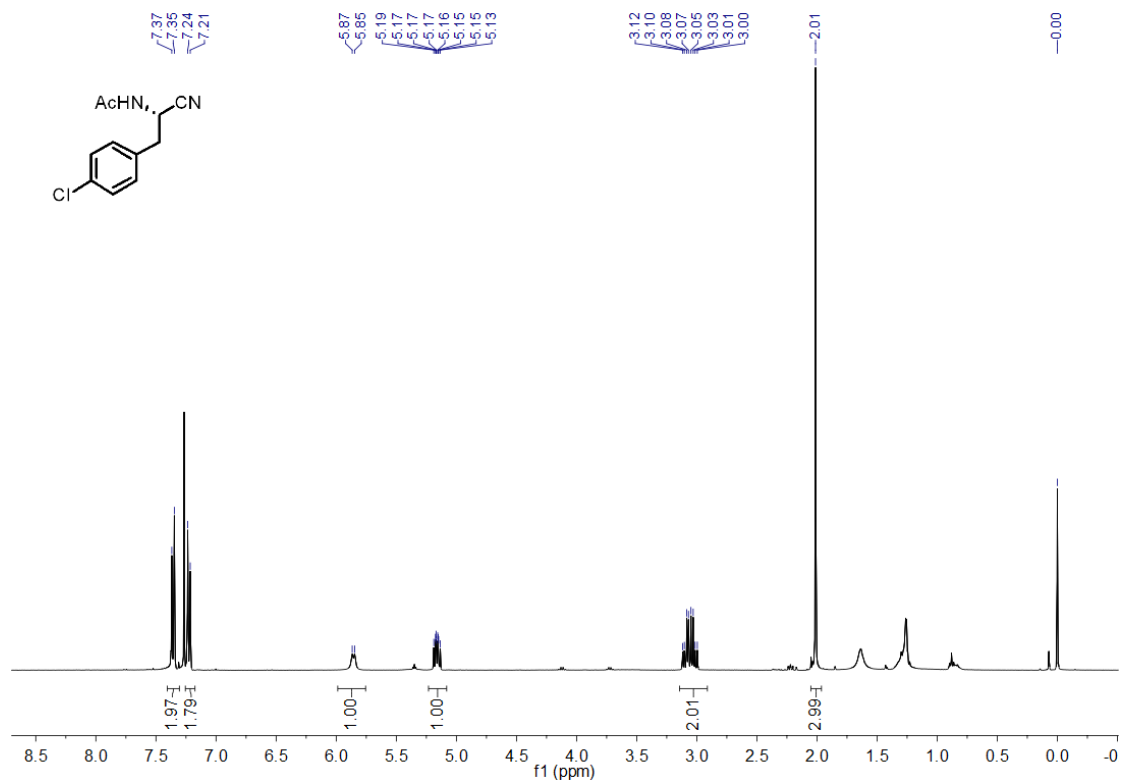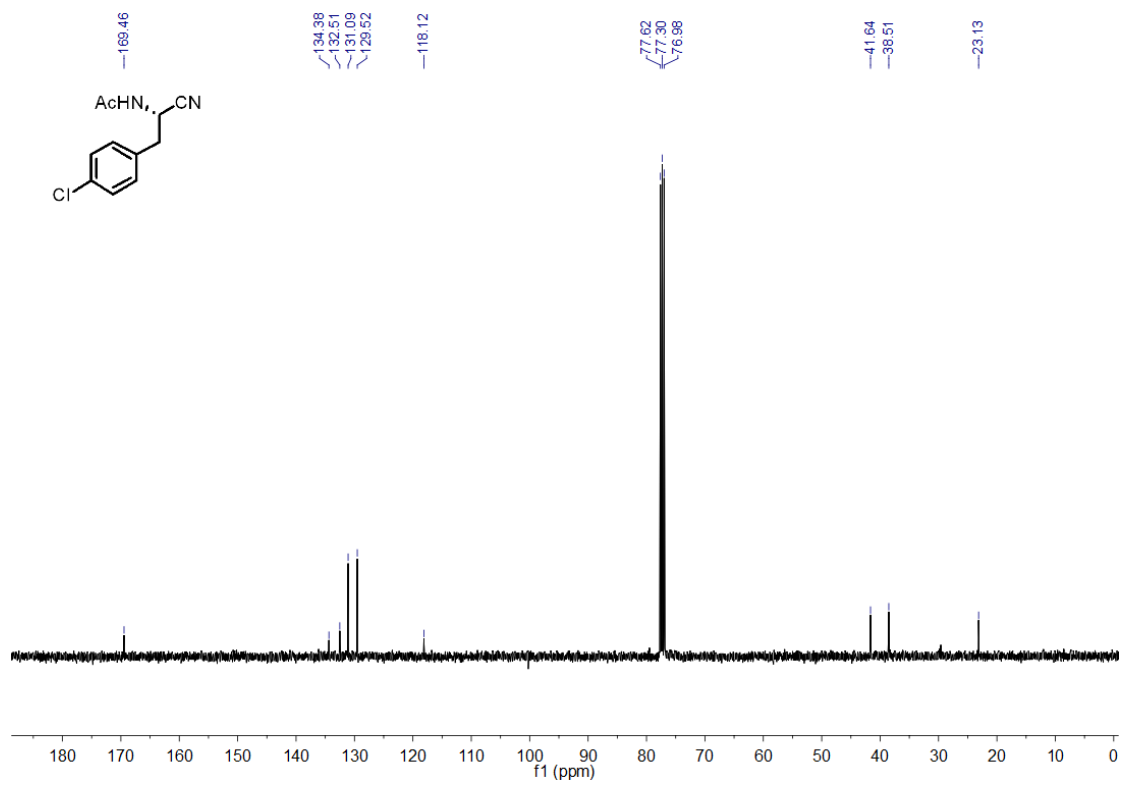

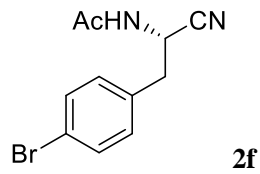

7.37  
7.35  
7.24  
7.21

5.87  
5.19  
5.17  
5.17  
5.16  
5.16  
5.15  
5.13

3.12  
3.10  
3.08  
3.07  
3.05  
3.03  
3.01  
3.00

-2.01

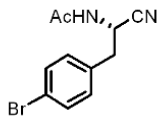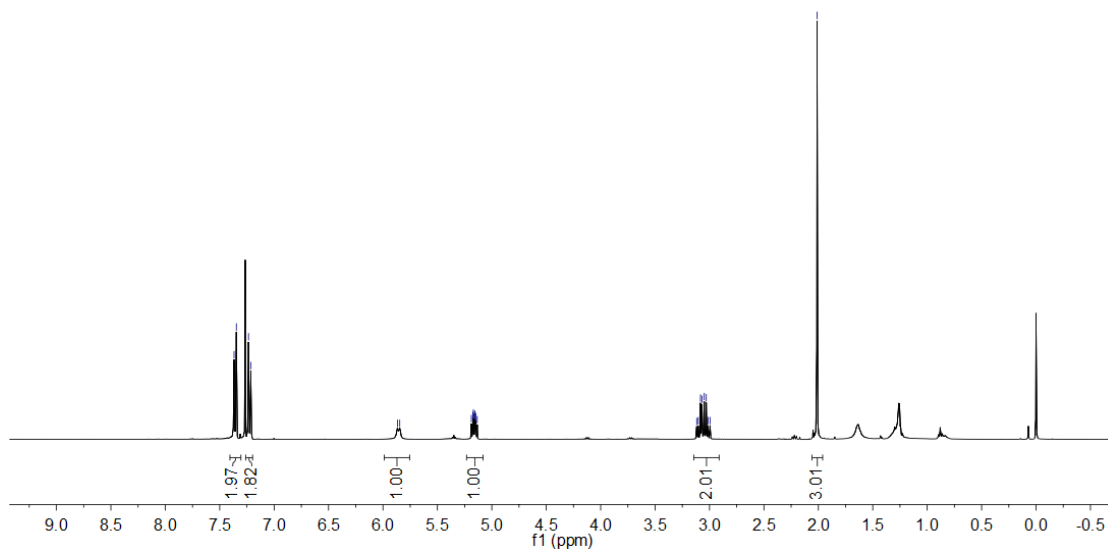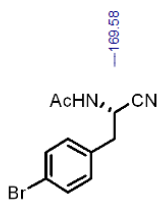

169.68

133.07  
132.45  
131.42

122.44  
118.13

41.58  
38.54

23.10

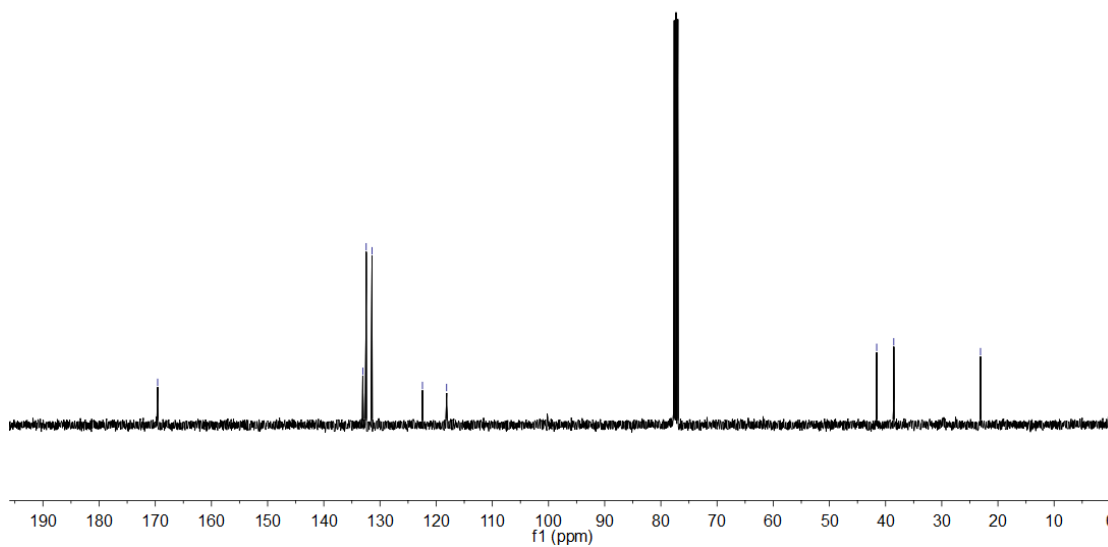

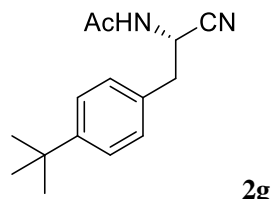

**2g**

7.40  
7.40  
7.38  
7.38  
7.37  
7.22  
7.20

6.21  
6.19

5.16  
5.15  
5.14  
5.13  
5.12  
5.11

3.11  
3.10  
3.08  
3.06  
3.04  
3.02  
3.00  
2.99

1.99

1.31

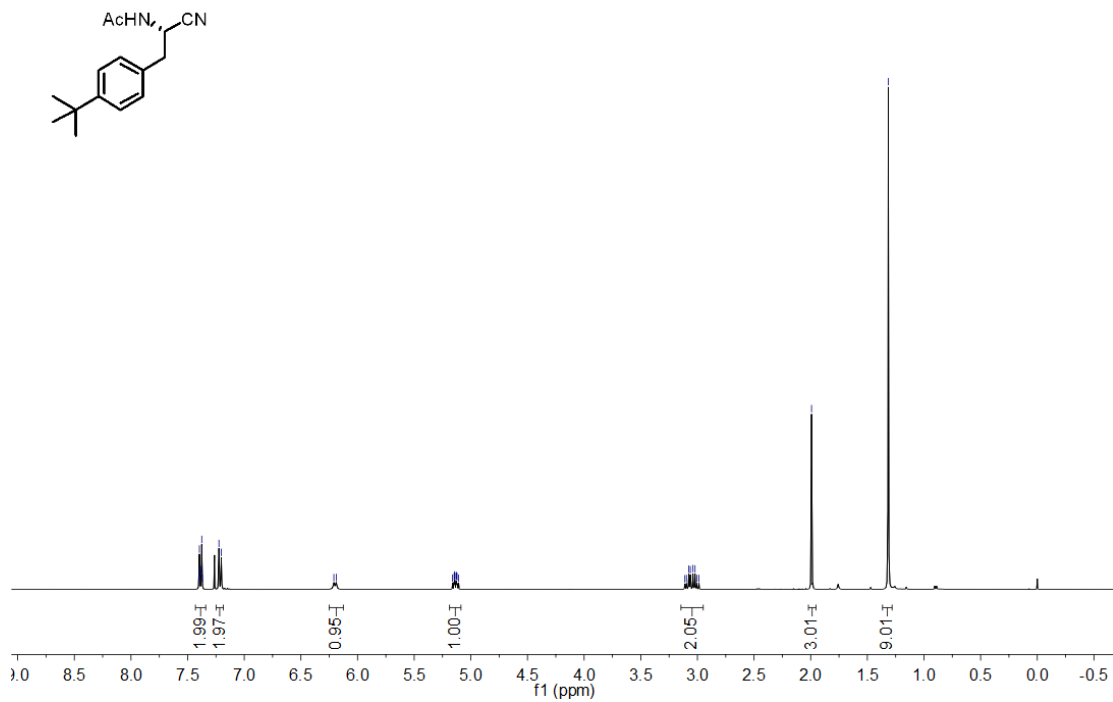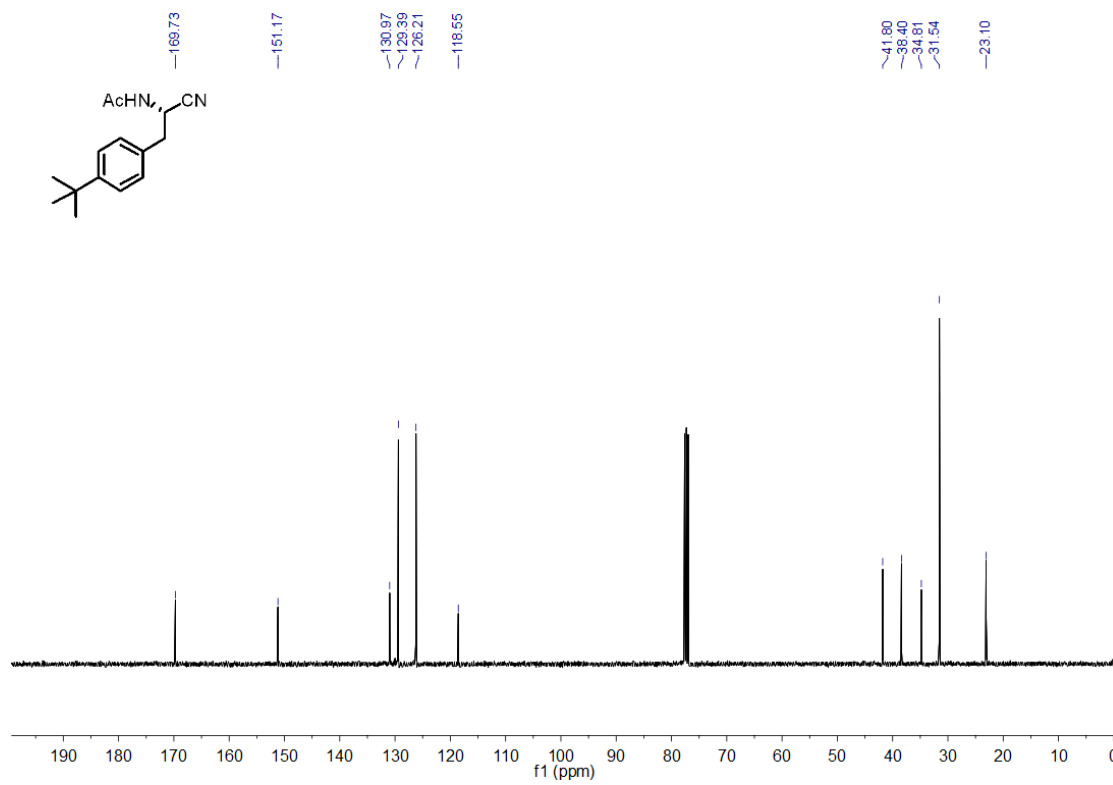

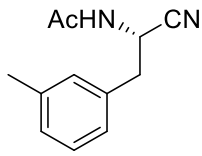

**2h**

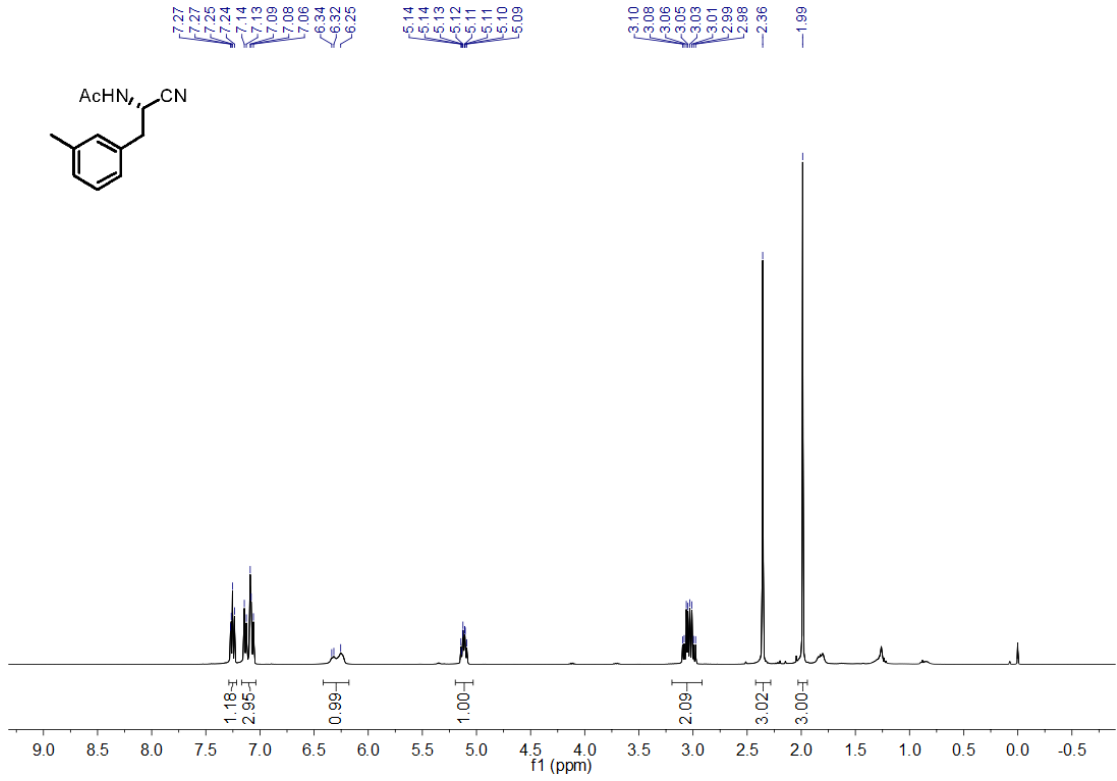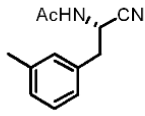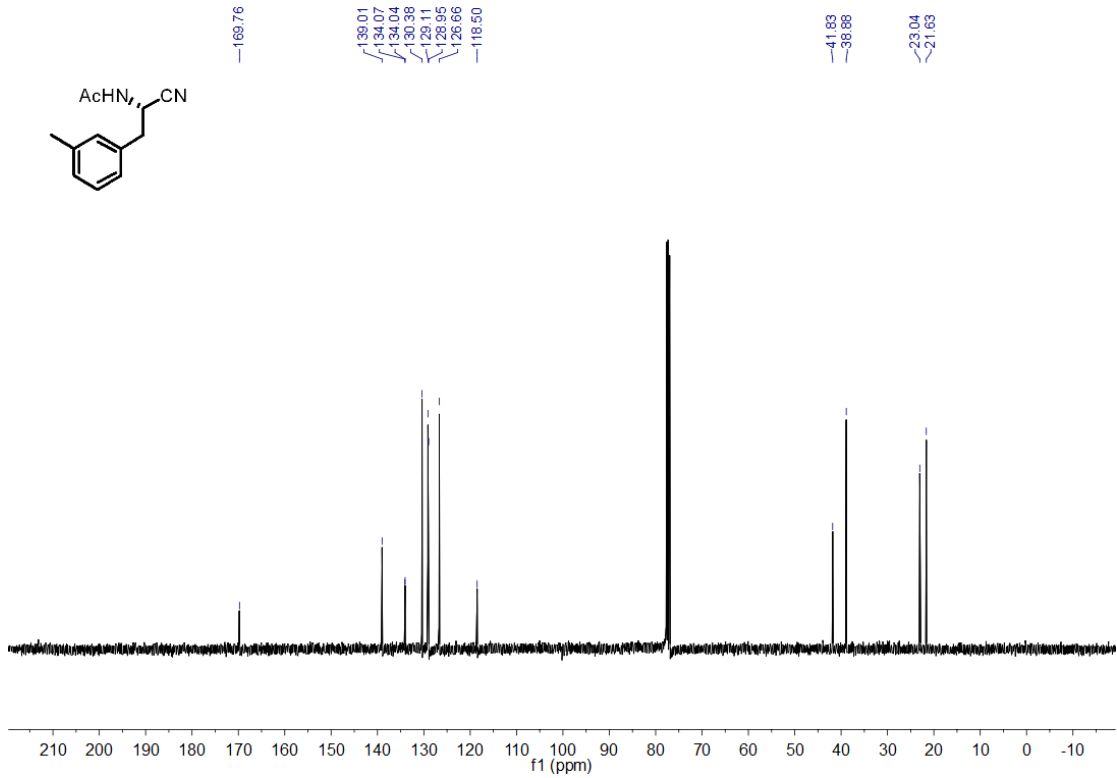

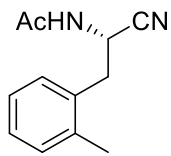

**2i**

7.25  
7.23  
7.22  
7.21  
7.20  
7.19  
7.18  
7.17

6.19

5.15  
5.13  
5.11  
5.09

3.13  
3.11

2.38

2.00

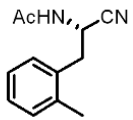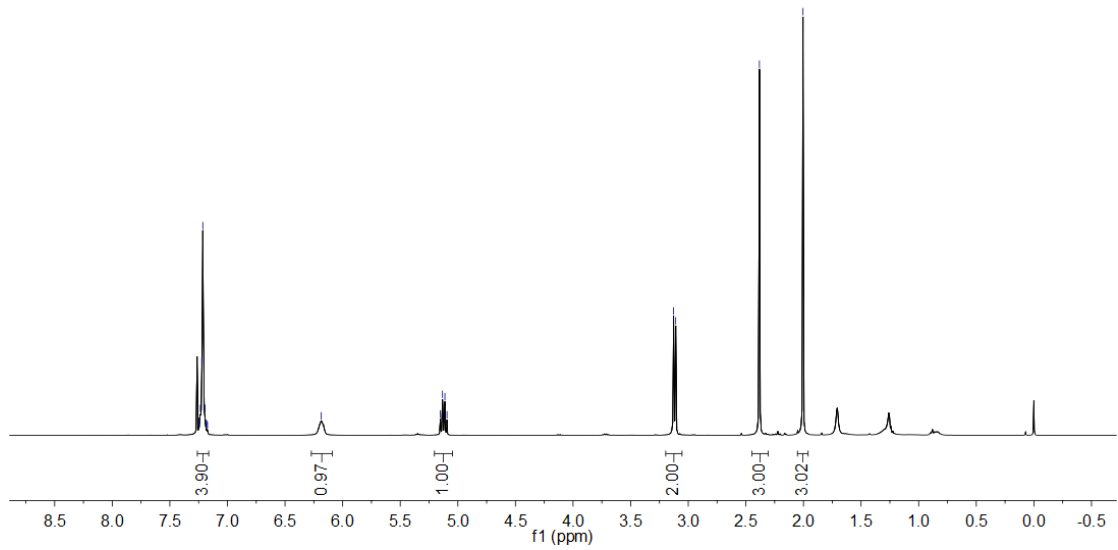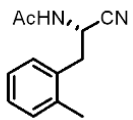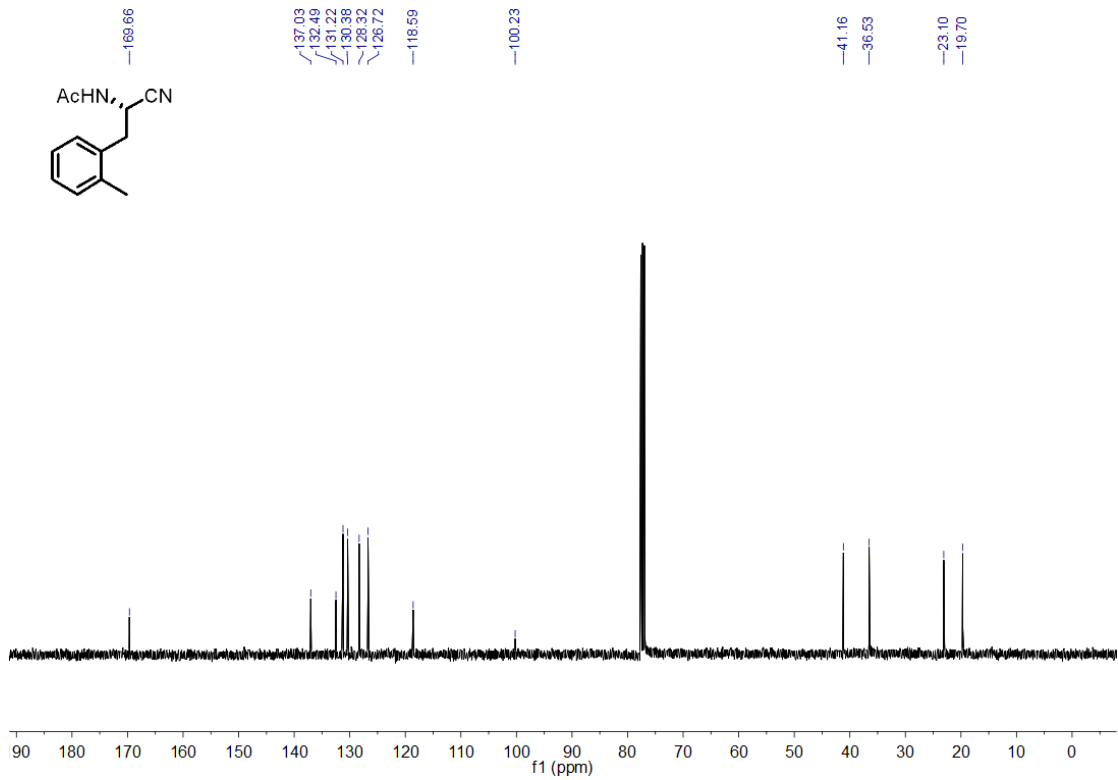



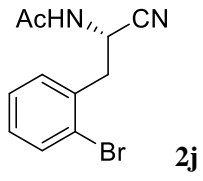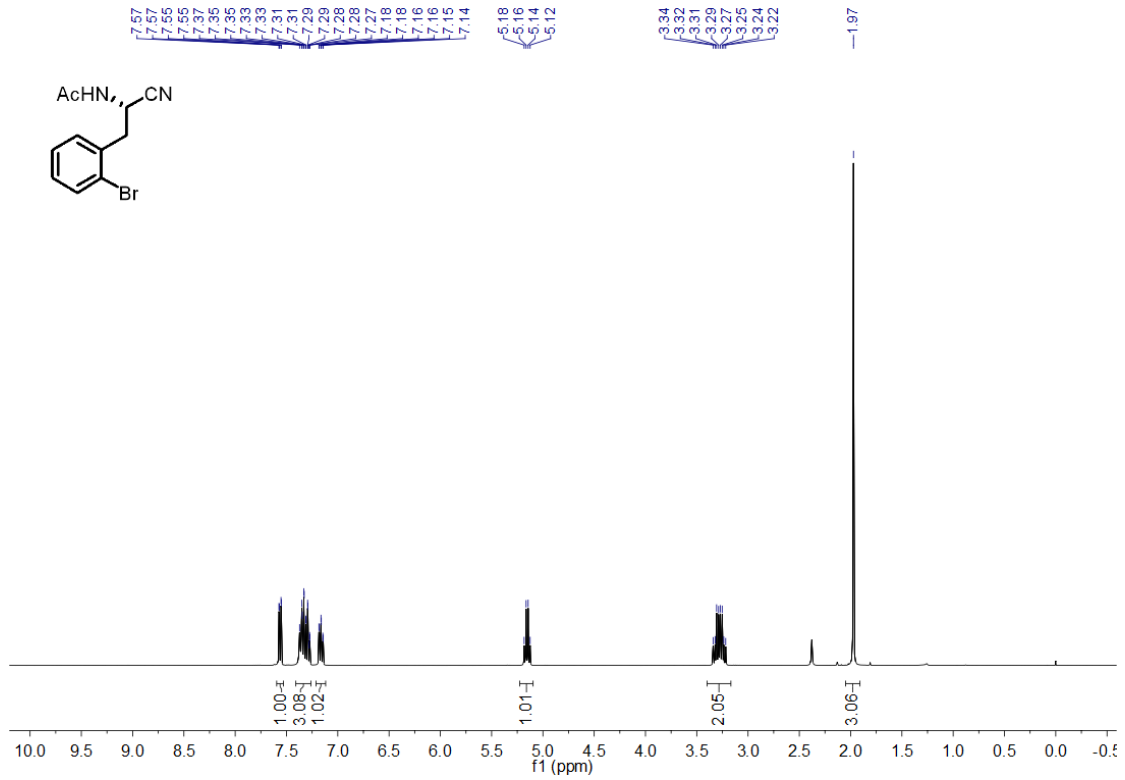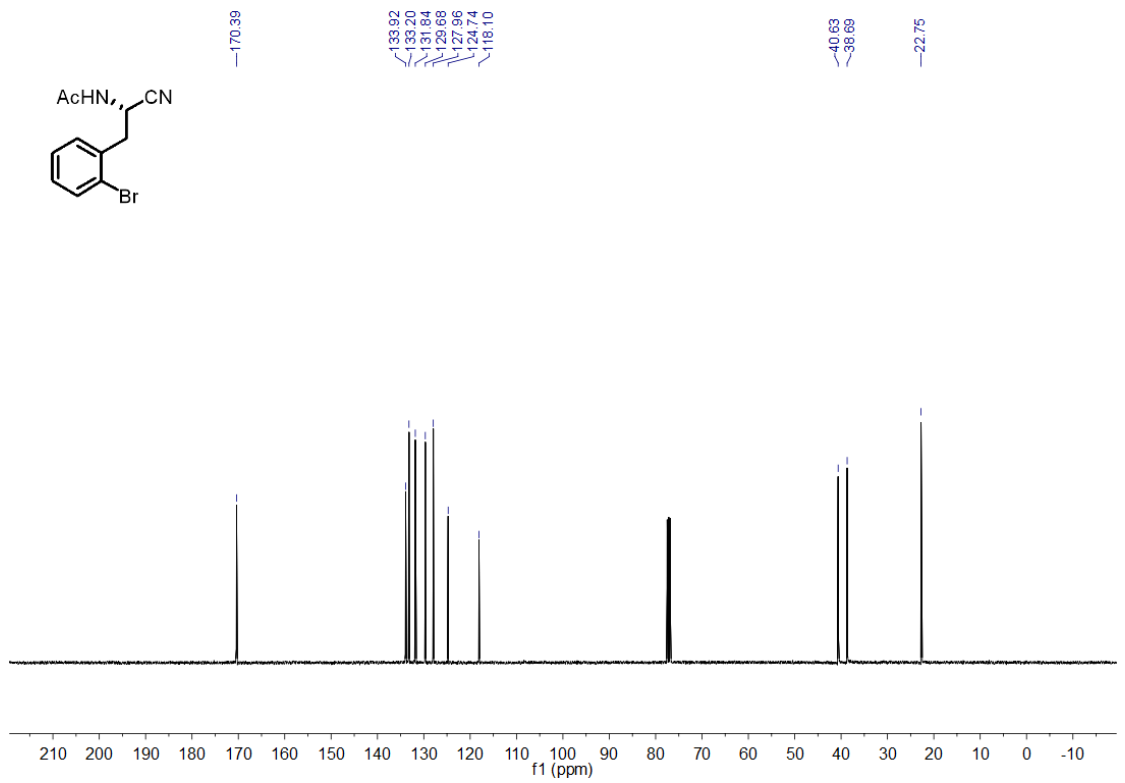

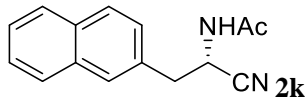

7.85  
 7.83  
 7.82  
 7.80  
 7.71  
 7.51  
 7.49  
 7.48  
 7.47  
 7.38  
 7.36  
 6.36  
 6.34  
 5.22  
 5.20  
 5.18  
 5.17  
 3.26  
 3.25  
 3.23  
 3.21  
 3.20  
 3.18  
 3.15  
 -1.93

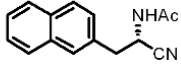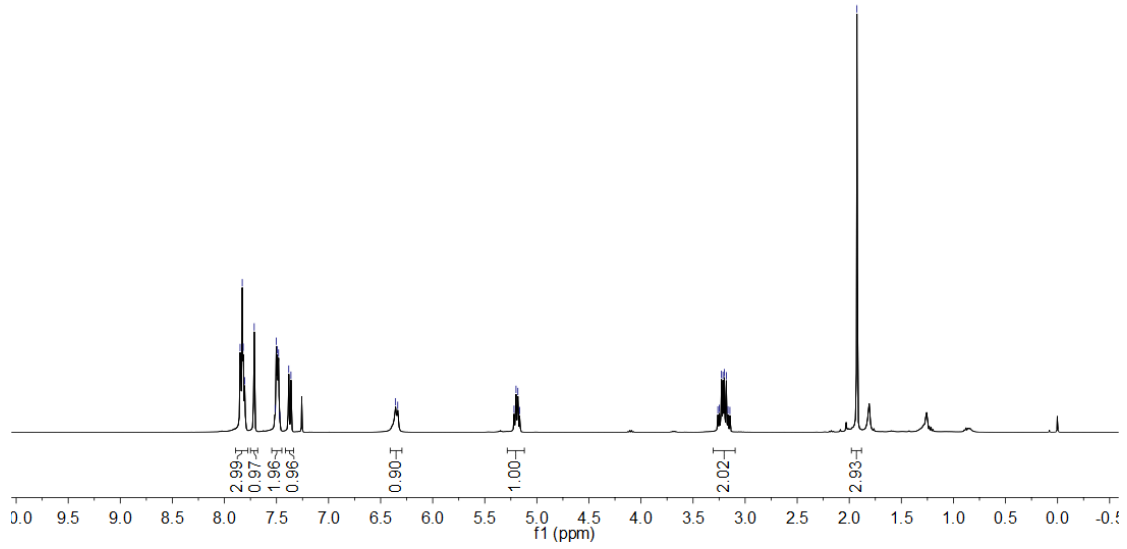

169.87  
 133.61  
 133.01  
 131.63  
 129.06  
 128.75  
 127.98  
 127.27  
 126.54  
 118.50  
 41.75  
 39.06  
 22.97

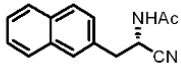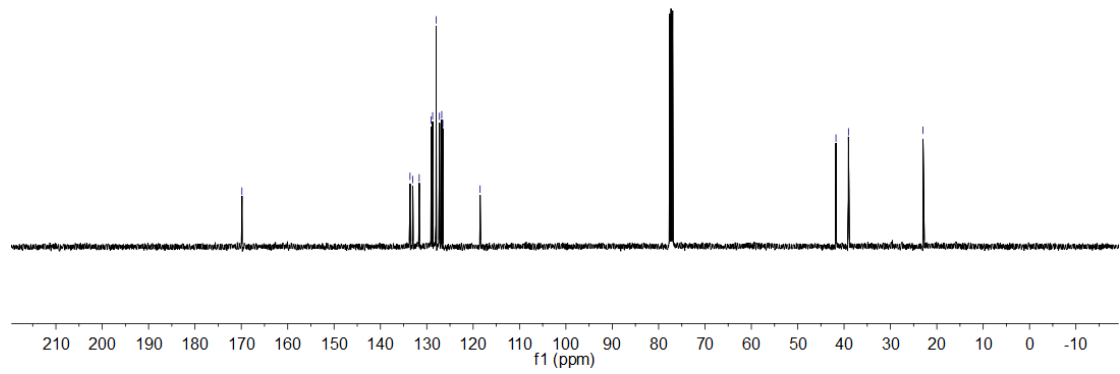

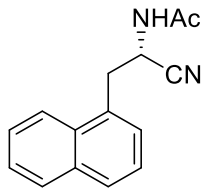

21

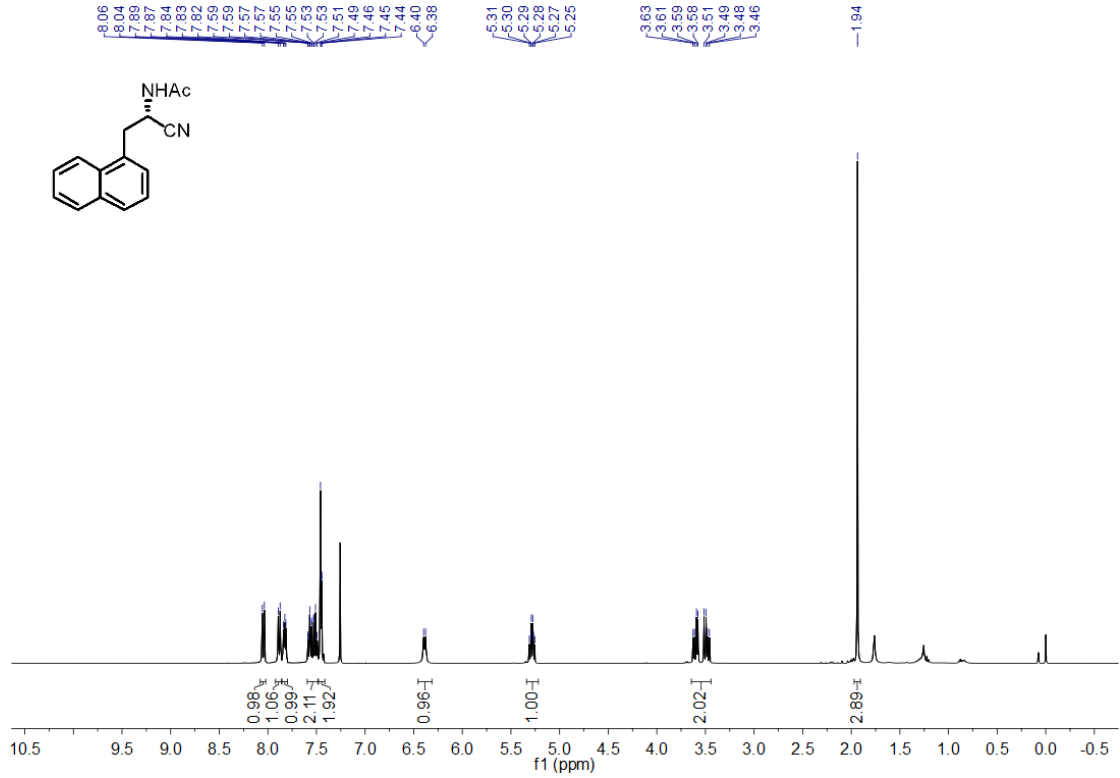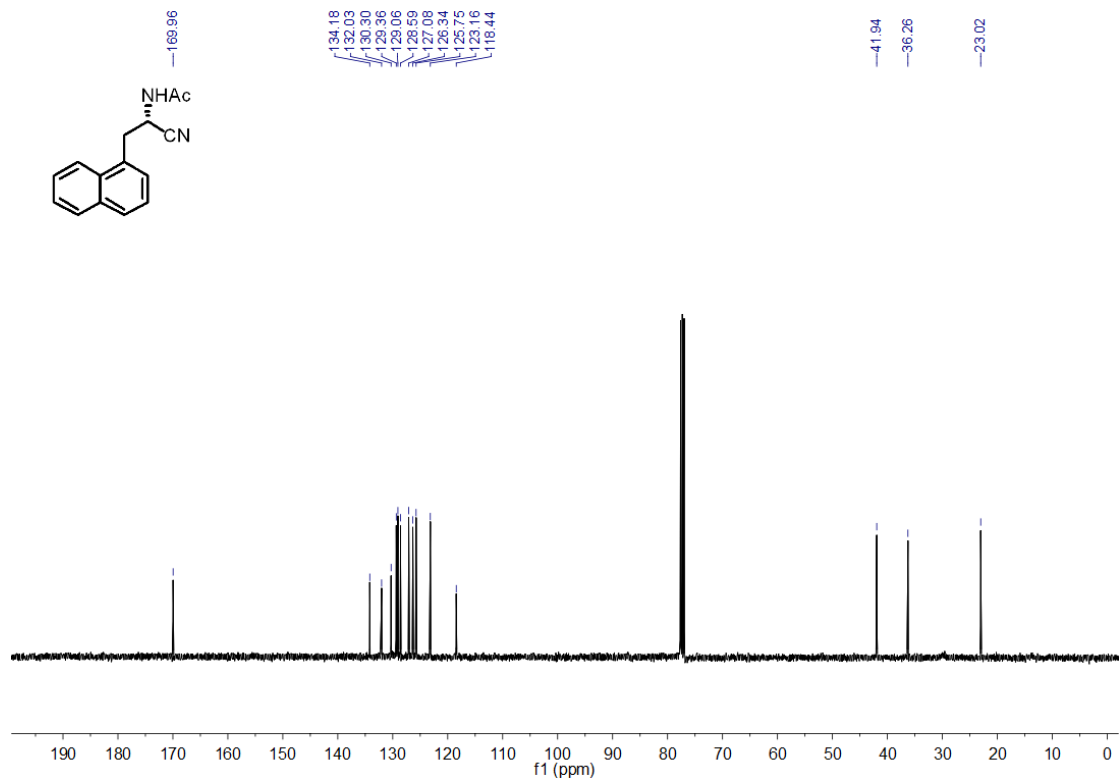

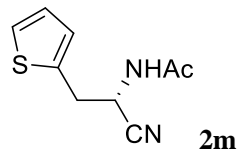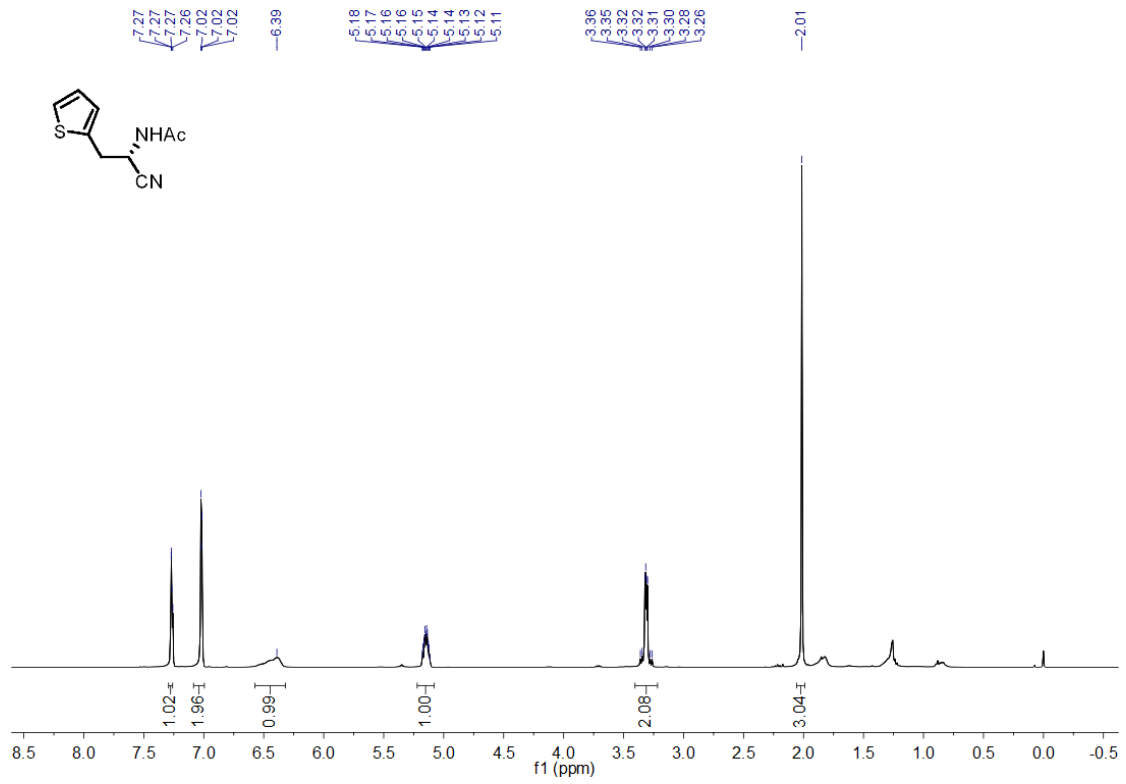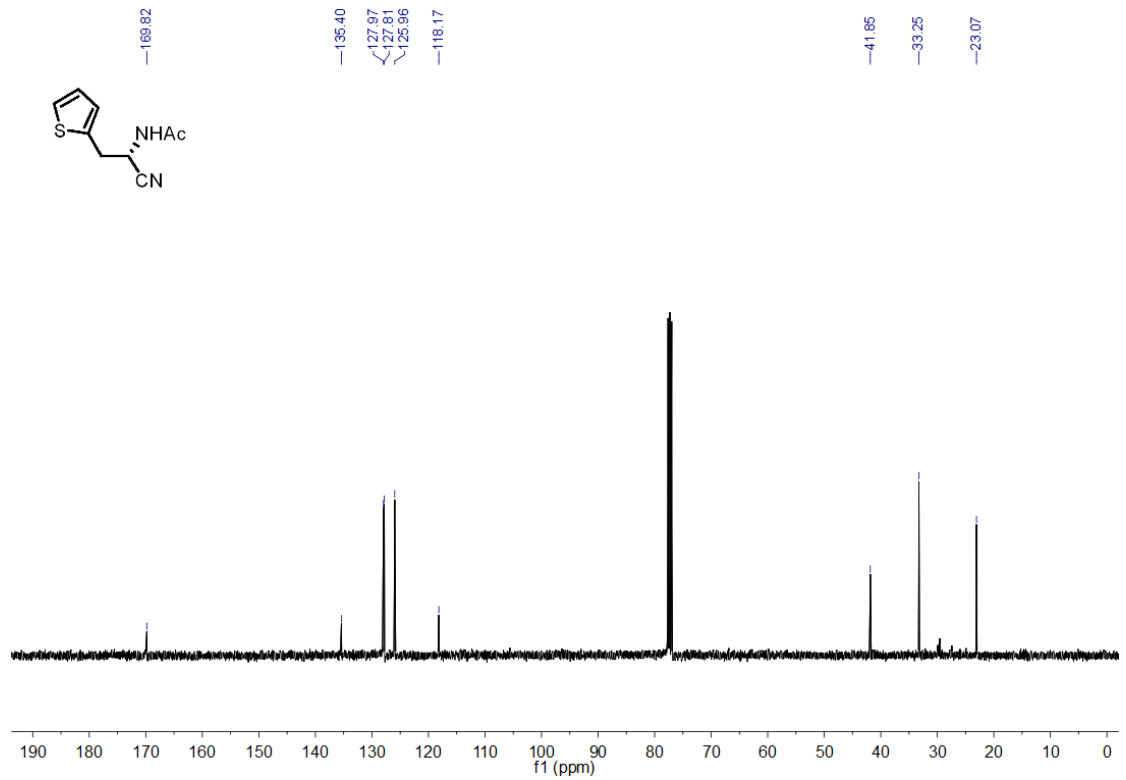

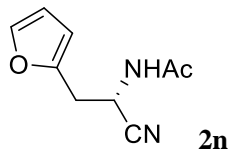

7.42, 7.41, 6.38, 6.39, 6.37, 6.37, 6.30, 6.30, 6.13, 6.11, 5.22, 5.20, 5.20, 5.19, 5.18, 5.17, 3.17, 3.16, 3.15, -2.04

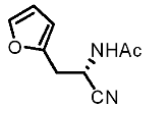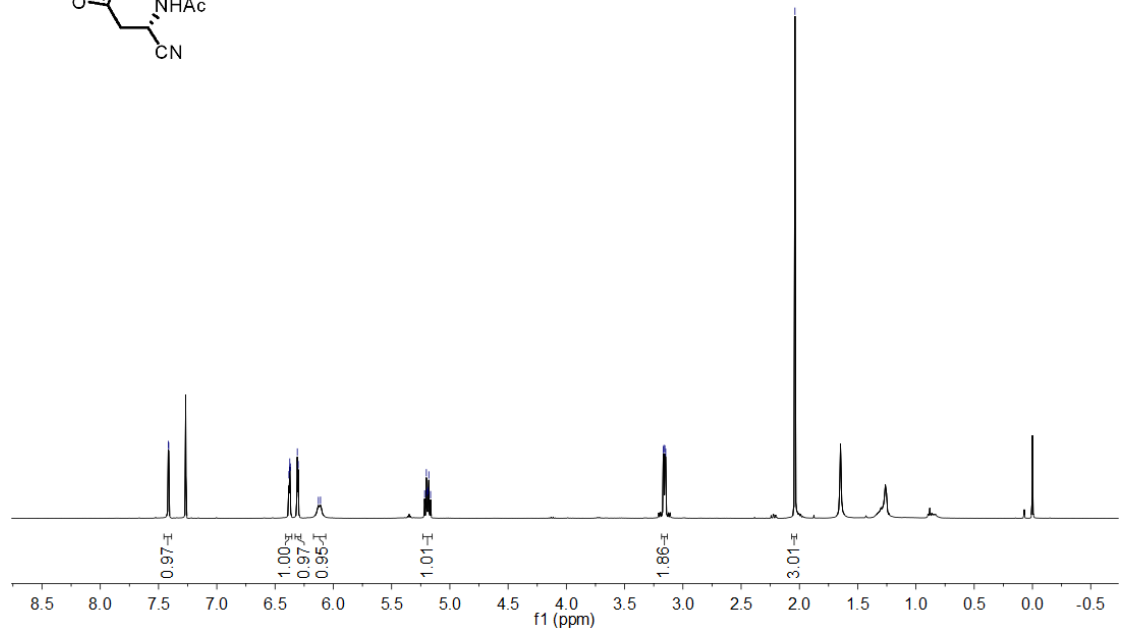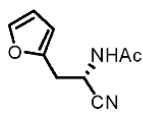

169.60, 148.56, 143.22, 117.92, 111.08, 109.54, 40.15, 31.71, 23.15

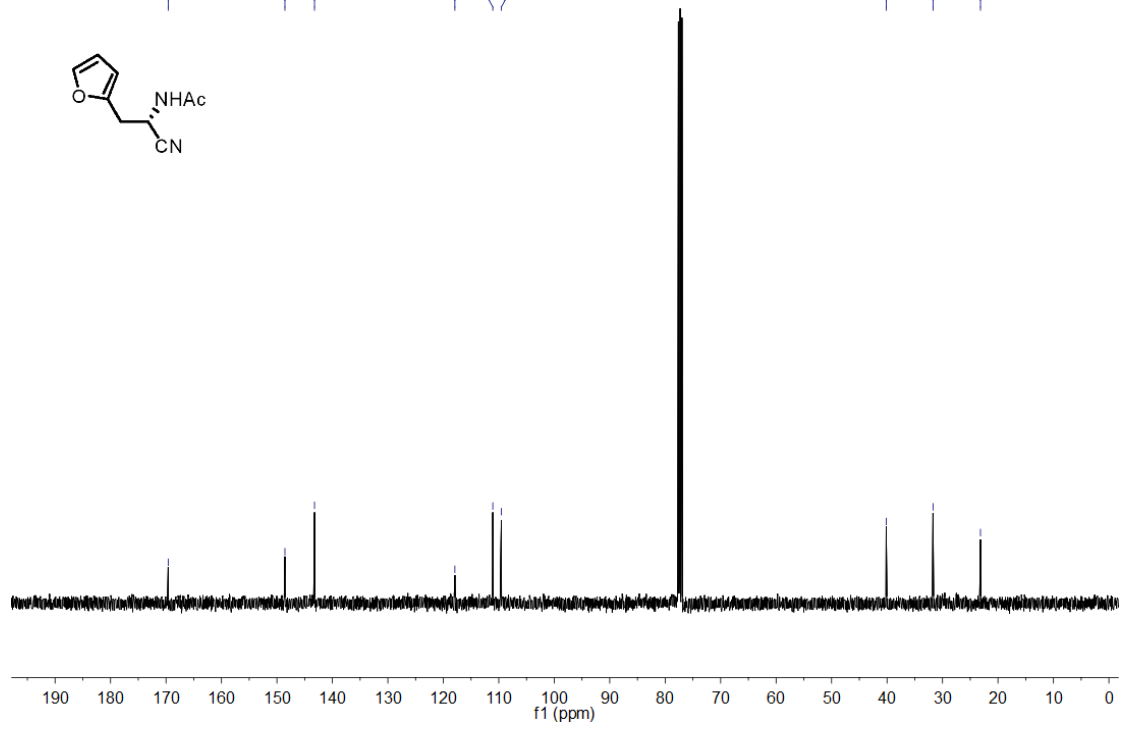

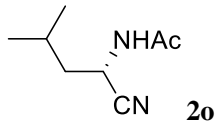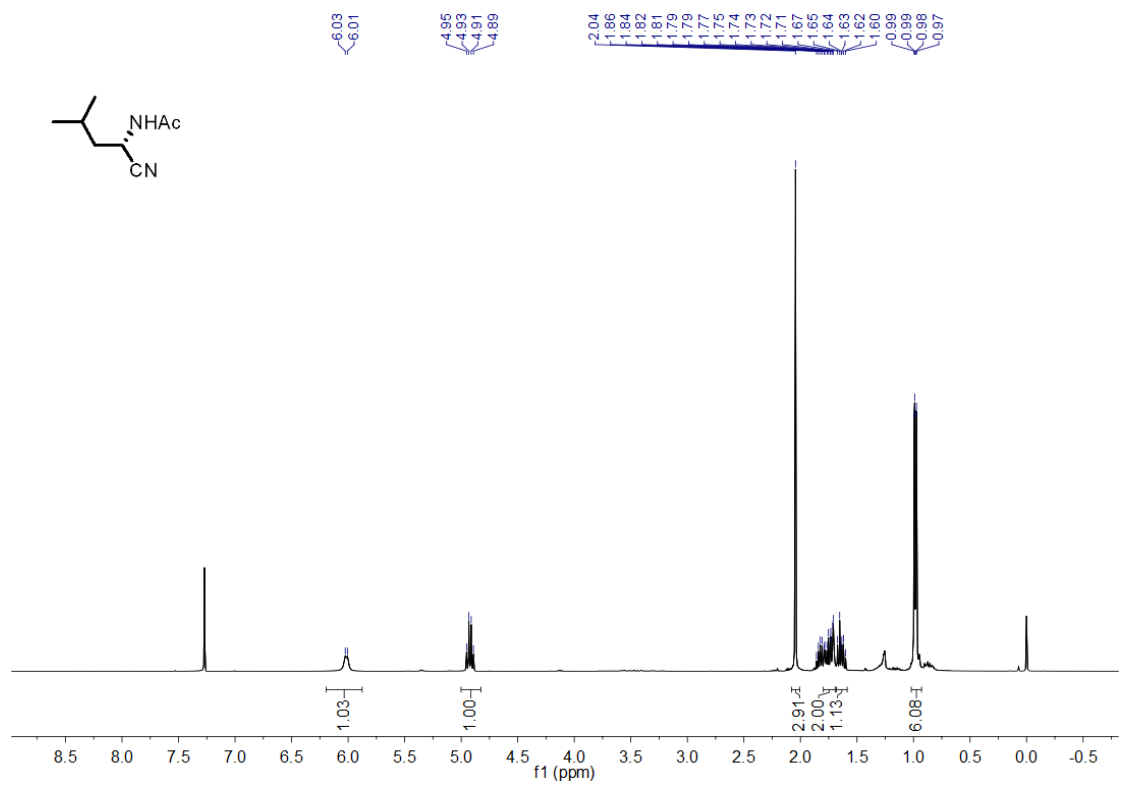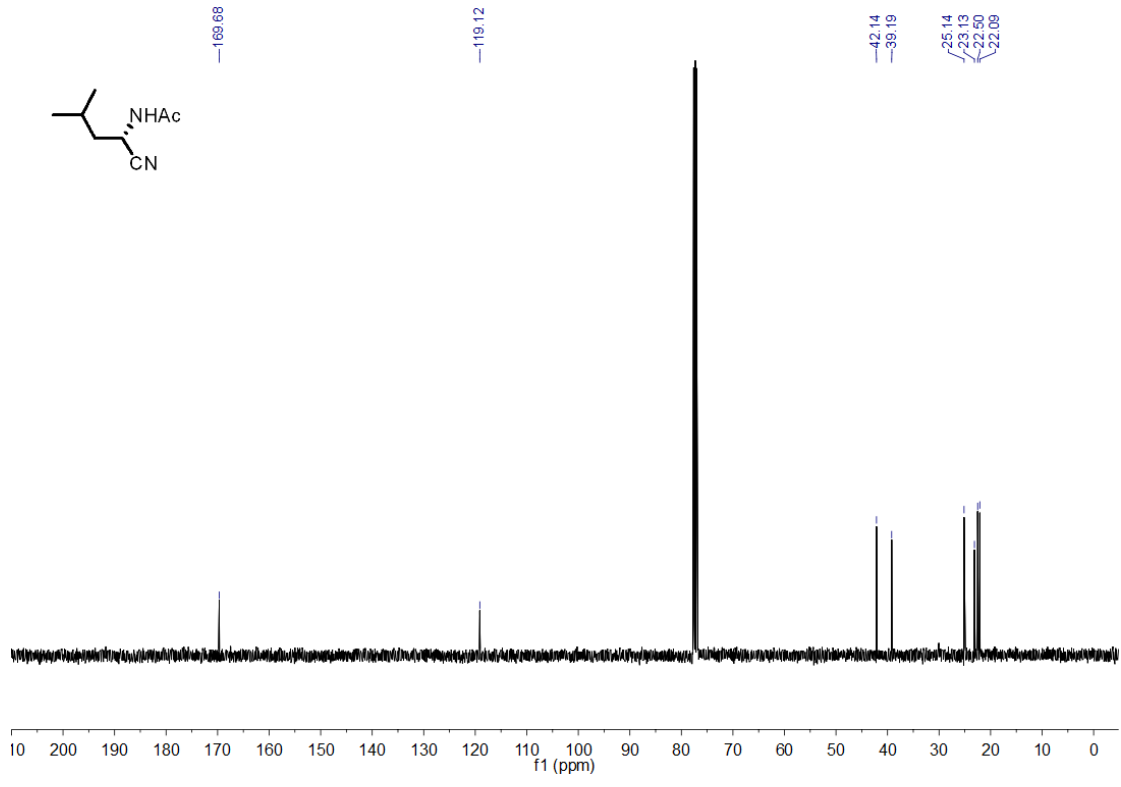

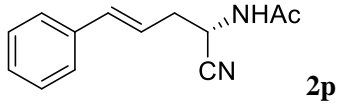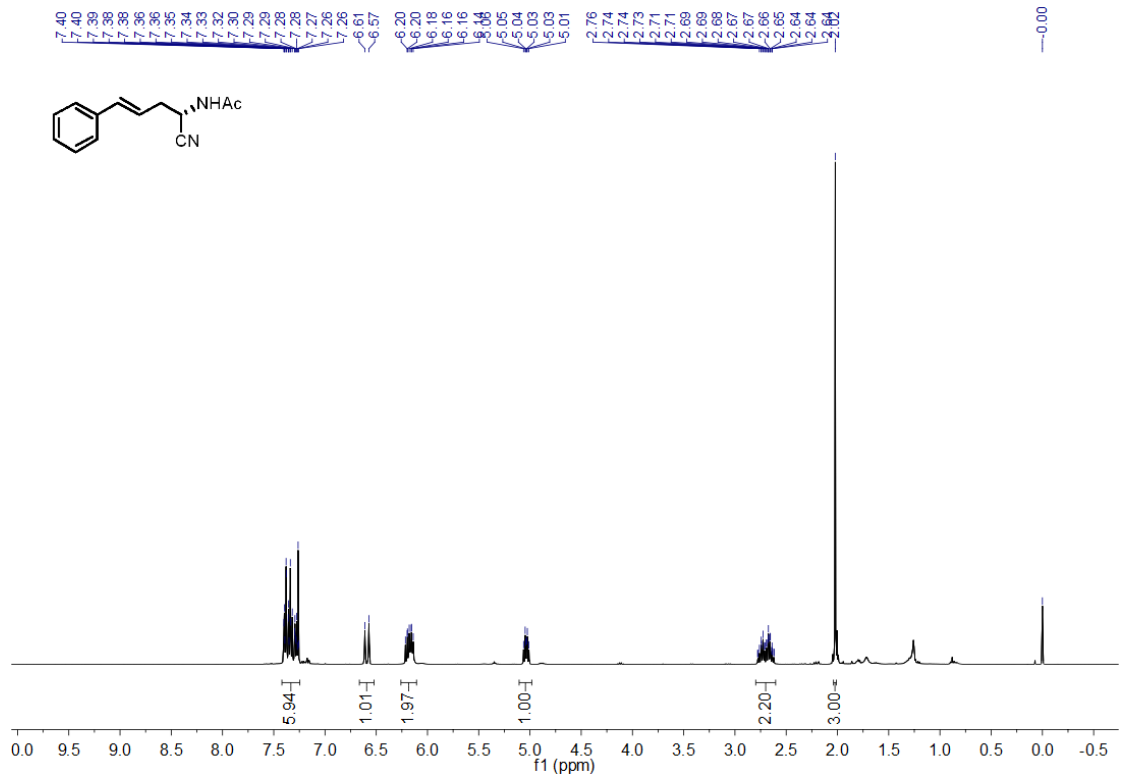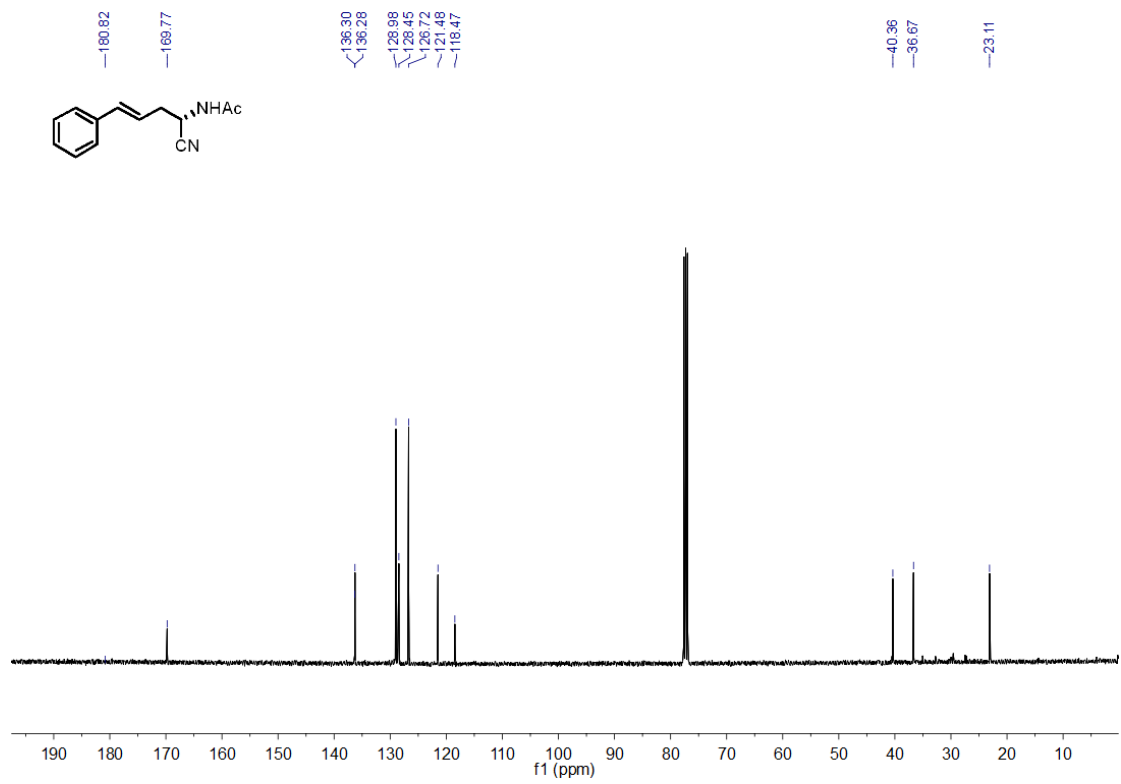

## 5. HPLC spectra of 2

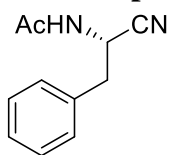

Data File E:\DATA\LXX\C-BIAOZHUN\C-PH-RAC 2016-06-14 10-40-50\092-0201.D  
 Sample Name: C-Ph-Rac

```

=====
Acq. Operator   : SYSTEM                      Seq. Line :    2
Acq. Instrument : 1260HPLC-VWD                Location  : Vial 92
Injection Date  : 6/14/2016 11:09:55 AM      Inj       :    1
                                           Inj Volume: 3.000 µl
Acq. Method    : E:\DATA\LXX\C-BIAOZHUN\C-PH-RAC 2016-06-14 10-40-50\VWD-AD (1-6)-95-5-1ML
                                           -3UL-220-40MIN.M
Last changed   : 6/14/2016 10:40:51 AM by SYSTEM
Analysis Method : E:\DATA\LXX\C-BIAOZHUN\C-PH-RAC 2016-06-14 10-40-50\VWD-AD (1-6)-95-5-1ML
                                           -3UL-220-40MIN.M (Sequence Method)
Last changed   : 6/14/2016 1:27:44 PM by SYSTEM
                                           (modified after loading)
Additional Info : Peak(s) manually integrated
  
```

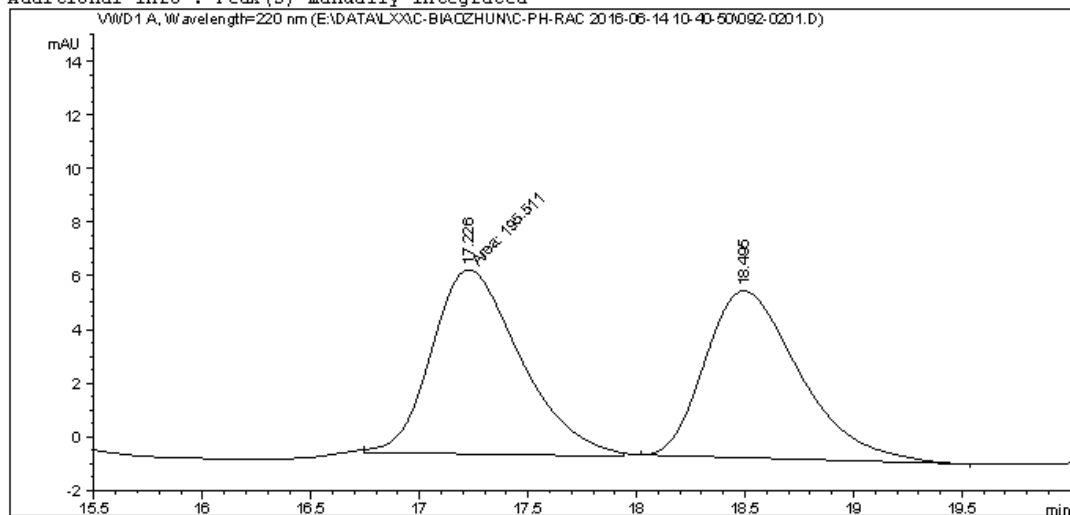

### Area Percent Report

```

Sorted By      : Signal
Multiplier     : 1.0000
Dilution       : 1.0000
Do not use Multiplier & Dilution Factor with ISTDs
  
```

Signal 1: VWD1 A, Wavelength=220 nm

| Peak # | RetTime [min] | Type | Width [min] | Area [mAU*s] | Height [mAU] | Area %  |
|--------|---------------|------|-------------|--------------|--------------|---------|
| 1      | 17.226        | MM   | 0.4737      | 195.51149    | 6.87861      | 50.9462 |
| 2      | 18.495        | BB   | 0.4676      | 188.24924    | 6.22795      | 49.0538 |

Totals : 383.76073 13.10656

\*\*\* End of Report \*\*\*



Data File E:\DATA\LXX\C-BIAOZHUN\C-45 2016-06-04 10-12-27\094-0401.D  
 Sample Name: c-45-3

```

=====
Acq. Operator   : SYSTEM                               Seq. Line :    4
Acq. Instrument : 1260HPLC-VWD                       Location  : Vial 94
Injection Date  : 6/4/2016 11:36:29 AM              Inj       :    1
                                                    Inj Volume: 3.000 µl

Acq. Method     : E:\DATA\LXX\C-BIAOZHUN\C-45 2016-06-04 10-12-27\VWD-AD(1-6)-95-5-1.OML-
                  3UL-220-30MIN.M
Last changed    : 6/4/2016 10:12:28 AM by SYSTEM
Analysis Method : E:\DATA\LXX\C-BIAOZHUN\C-45 2016-06-04 10-12-27\VWD-AD(1-6)-95-5-1.OML-
                  3UL-220-30MIN.M (Sequence Method)
Last changed    : 6/6/2016 9:16:06 PM by SYSTEM
                  (modified after loading)
Additional Info : Peak(s) manually integrated
  
```

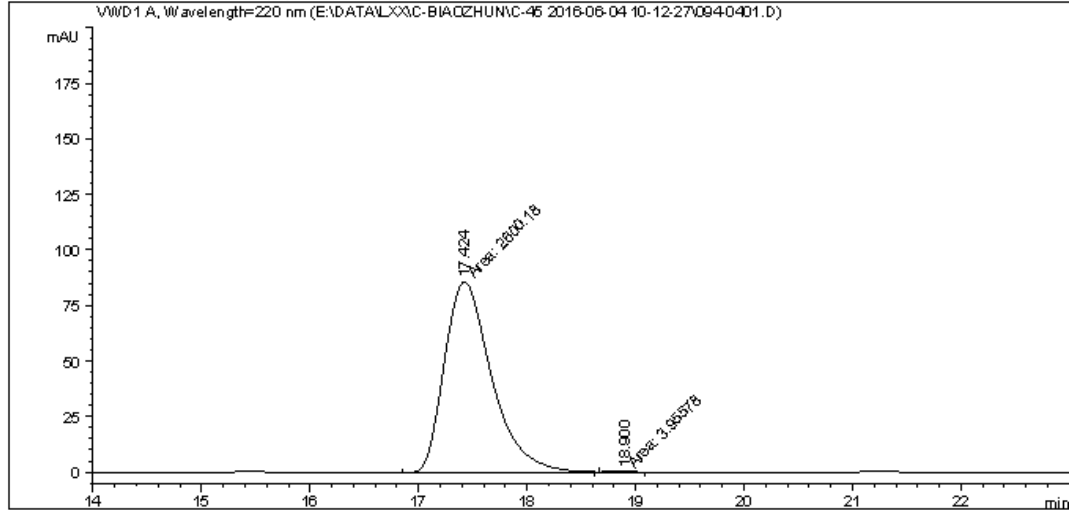

=====  
 Area Percent Report  
 =====

```

Sorted By       :      Signal
Multiplier      :      1.0000
Dilution       :      1.0000
Do not use Multiplier & Dilution Factor with ISTDs
  
```

Signal 1: VWD1 A, Wavelength=220 nm

| Peak # | RetTime [min] | Type | Width [min] | Area [mAU*s] | Height [mAU] | Area %  |
|--------|---------------|------|-------------|--------------|--------------|---------|
| 1      | 17.424        | MM   | 0.5045      | 2600.18091   | 85.90569     | 99.8481 |
| 2      | 18.900        | MM   | 0.3078      | 3.95578      | 2.14172e-1   | 0.1519  |

Totals :                    2604.13669    86.11986

=====  
 \*\*\* End of Report \*\*\*

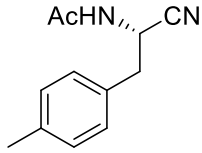

**2b**

Data File E:\DATA\LXX\C-P-CH3\C-47 2016-06-07 10-34-34\092-0201.D  
 Sample Name: p-Me-Rac

```

=====
Acq. Operator   : SYSTEM                      Seq. Line :    2
Acq. Instrument : 1260HPLC-VWD                 Location  : Vial 92
Injection Date  : 6/7/2016 10:46:05 AM        Inj       :    1
                                           Inj Volume: 3.000 µl
Acq. Method     : E:\DATA\LXX\C-P-CH3\C-47 2016-06-07 10-34-34\VWD-AD(1-6)-95-5-1ML-3UL-
                    50MIN-220NM-.M
Last changed    : 6/7/2016 10:34:34 AM by SYSTEM
Analysis Method : E:\DATA\LXX\C-P-CH3\C-47 2016-06-07 10-34-34\VWD-AD(1-6)-95-5-1ML-3UL-
                    50MIN-220NM-.M (Sequence Method)
Last changed    : 6/7/2016 12:46:44 PM by SYSTEM
                    (modified after loading)
Additional Info  : Peak(s) manually integrated
  
```

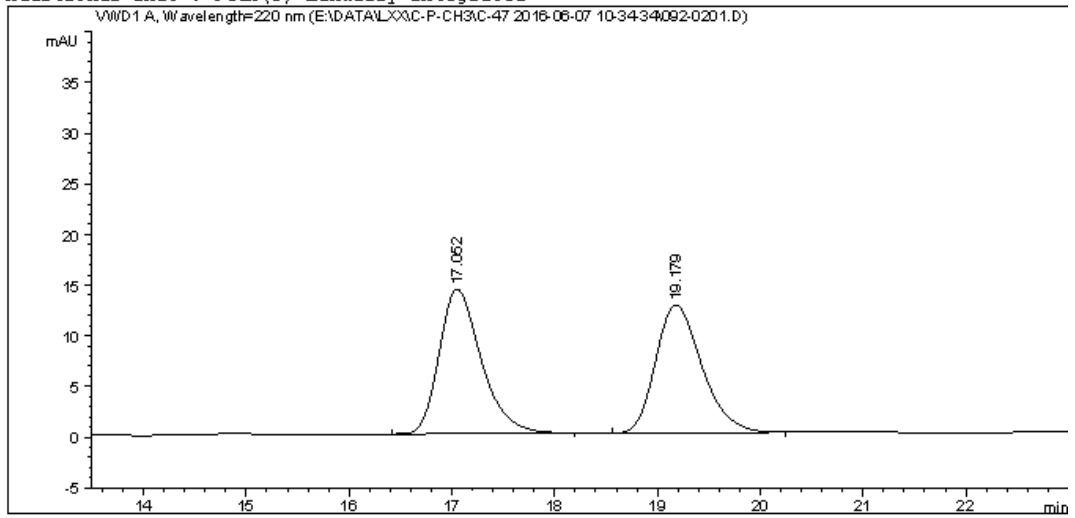

=====  
 Area Percent Report  
 =====

```

Sorted By      :      Signal
Multiplier     :      1.0000
Dilution       :      1.0000
Do not use Multiplier & Dilution Factor with ISTDs
  
```

Signal 1: VWD1 A, Wavelength=220 nm

| Peak # | RetTime [min] | Type | Width [min] | Area [mAU*s] | Height [mAU] | Area %  |
|--------|---------------|------|-------------|--------------|--------------|---------|
| 1      | 17.052        | BB   | 0.4346      | 405.46860    | 14.26752     | 50.7149 |
| 2      | 19.179        | BB   | 0.4789      | 394.03778    | 12.63250     | 49.2851 |

Totals :                    799.50638    26.90002

=====  
 \*\*\* End of Report \*\*\*

```
=====
Acq. Operator   : SYSTEM                               Seq. Line :    3
Acq. Instrument : 1260HPLC-VWD                       Location  : Vial 93
Injection Date  : 6/7/2016 11:36:49 AM              Inj       :    1
                                                    Inj Volume: 3.000 µl
Acq. Method     : E:\DATA\LXX\C-P-CH3\C-47 2016-06-07 10-34-34\VWD-AD(1-6)-95-5-1ML-3UL-
                  50MIN-220NM-.M
Last changed    : 6/7/2016 10:34:34 AM by SYSTEM
Analysis Method : E:\DATA\LXX\C-P-CH3\C-47 2016-06-07 10-34-34\VWD-AD(1-6)-95-5-1ML-3UL-
                  50MIN-220NM-.M (Sequence Method)
Last changed    : 6/7/2016 12:44:42 PM by SYSTEM
                  (modified after loading)
Additional Info : Peak(s) manually integrated
=====
```

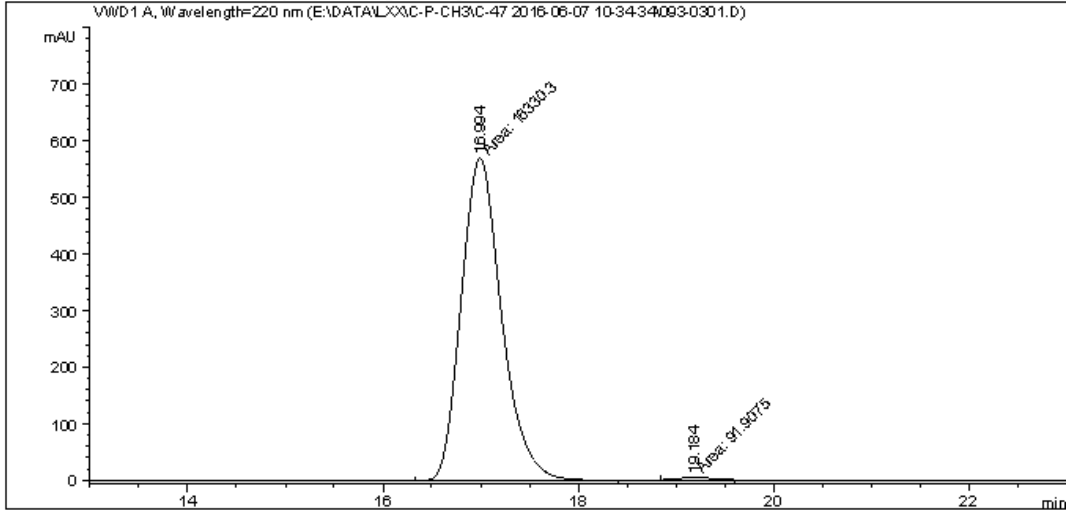

```
=====
Area Percent Report
=====
```

```
Sorted By      : Signal
Multiplier     : 1.0000
Dilution      : 1.0000
Do not use Multiplier & Dilution Factor with ISTDs
```

Signal 1: VWD1 A, Wavelength=220 nm

| Peak # | RetTime [min] | Type | Width [min] | Area [mAU*s] | Height [mAU] | Area %  |
|--------|---------------|------|-------------|--------------|--------------|---------|
| 1      | 16.994        | MM   | 0.4782      | 1.63303e4    | 569.18378    | 99.4403 |
| 2      | 19.184        | MM   | 0.4122      | 91.90754     | 3.71598      | 0.5597  |

```
Totals :                      1.64222e4  572.89976
```

```
=====
*** End of Report ***
=====
```

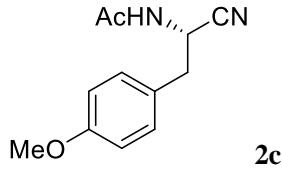

Data File E:\DATA\LXX\C-P-OCH3\C-48-AD 2016-06-15 11-47-30\092-0201.D  
 Sample Name: C-48-1-Rac

```

=====
Acq. Operator   : SYSTEM                      Seq. Line :    2
Acq. Instrument : 1260HPLC-VWD                Location  : Vial 92
Injection Date  : 6/15/2016 11:59:04 AM      Inj       :    1
                                           Inj Volume: 3.000 µl
Acq. Method     : E:\DATA\LXX\C-P-OCH3\C-48-AD 2016-06-15 11-47-30\VWD-AD (1-6)-95-5-1ML-
3UL-220-40MIN.M
Last changed    : 6/15/2016 11:47:30 AM by SYSTEM
Analysis Method : E:\DATA\LXX\C-P-OCH3\C-48-AD 2016-06-15 11-47-30\VWD-AD (1-6)-95-5-1ML-
3UL-220-40MIN.M (Sequence Method)
Last changed    : 6/15/2016 1:38:53 PM by SYSTEM
                 (modified after loading)
Additional Info : Peak(s) manually integrated
  
```

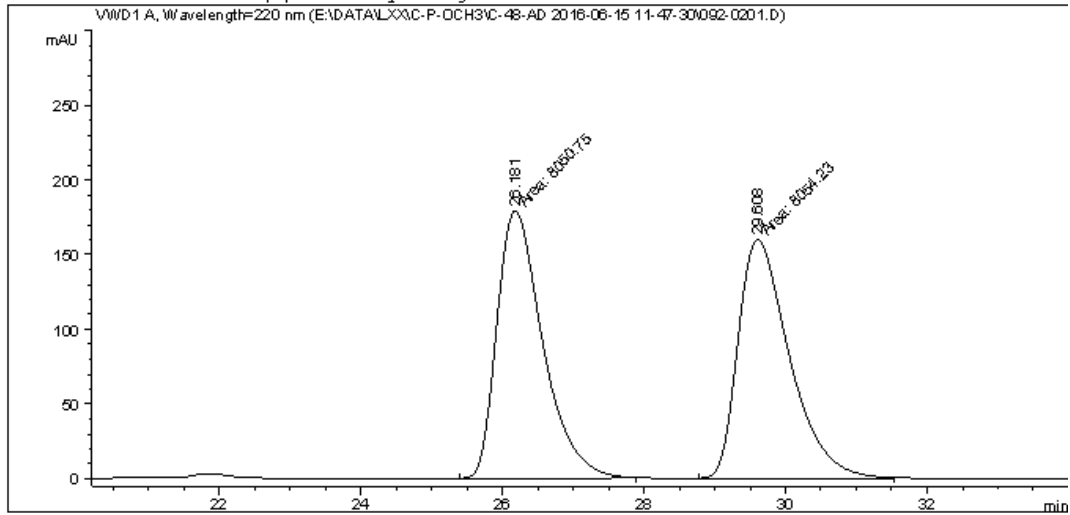

=====  
 Area Percent Report  
 =====

```

Sorted By      : Signal
Multiplier     : 1.0000
Dilution       : 1.0000
Do not use Multiplier & Dilution Factor with ISTDs
  
```

Signal 1: VWD1 A, Wavelength=220 nm

| Peak # | RetTime [min] | Type | Width [min] | Area [mAU*s] | Height [mAU] | Area %  |
|--------|---------------|------|-------------|--------------|--------------|---------|
| 1      | 26.181        | MM   | 0.7486      | 8050.75098   | 179.23079    | 49.9892 |
| 2      | 29.608        | MM   | 0.8399      | 8054.23486   | 159.83328    | 50.0108 |

Totals :                                    1.61050e4    339.06407

=====  
 \*\*\* End of Report \*\*\*

```
=====
Acq. Operator   : SYSTEM                      Seq. Line :    3
Acq. Instrument : 1260HPLC-VWD                Location  : Vial 93
Injection Date  : 6/15/2016 12:39:48 PM      Inj       :    1
                                           Inj Volume: 3.000 µl
Acq. Method     : E:\DATA\LXX\C-P-OCH3\C-48-AD 2016-06-15 11-47-30\VWD-AD (1-6)-95-5-1ML-
                 3UL-220-40MIN.M
Last changed    : 6/15/2016 11:47:30 AM by SYSTEM
Analysis Method : E:\DATA\LXX\C-P-OCH3\C-48-AD 2016-06-15 11-47-30\VWD-AD (1-6)-95-5-1ML-
                 3UL-220-40MIN.M (Sequence Method)
Last changed    : 6/15/2016 1:40:04 PM by SYSTEM
                 (modified after loading)
Additional Info : Peak(s) manually integrated
=====
```

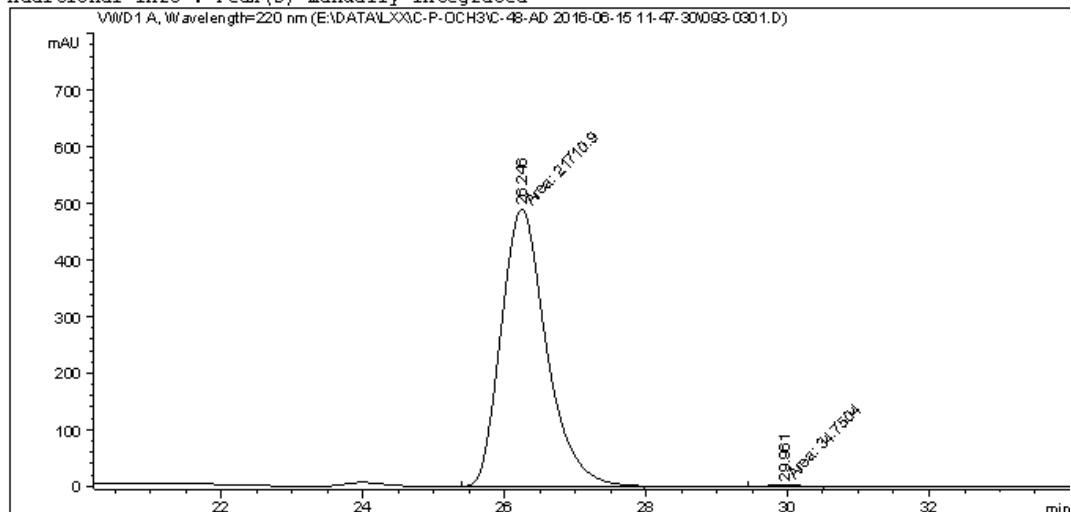

=====  
Area Percent Report  
=====

Sorted By : Signal  
Multiplier : 1.0000  
Dilution : 1.0000  
Do not use Multiplier & Dilution Factor with ISTDs

Signal 1: VWD1 A, Wavelength=220 nm

| Peak # | RetTime [min] | Type | Width [min] | Area [mAU*s] | Height [mAU] | Area %  |
|--------|---------------|------|-------------|--------------|--------------|---------|
| 1      | 26.246        | MM   | 0.7392      | 2.17109e4    | 489.53763    | 99.8402 |
| 2      | 29.961        | MM   | 0.5834      | 34.75039     | 9.92680e-1   | 0.1598  |

Totals : 2.17456e4 490.53031

=====  
\*\*\* End of Report \*\*\*

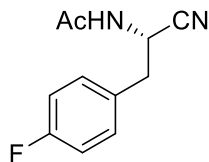

Data File E:\DATA\LXX\C-P-F\C-75 2016-07-06 08-29-26\093-0901.D  
 Sample Name: p-F-Rac

```

=====
Acq. Operator   : SYSTEM                      Seq. Line :    9
Acq. Instrument : 1260HPLC-VWD                Location  : Vial 93
Injection Date  : 7/6/2016 1:09:32 PM         Inj       :    1
                                           Inj Volume: 5.000 µl
Acq. Method     : E:\DATA\LXX\C-P-F\C-75 2016-07-06 08-29-26\VWD-AD (1-6)-95-5-1ML-SUL-
                220NM-40MIN.M
Last changed    : 7/6/2016 1:01:40 PM by SYSTEM
Analysis Method : E:\DATA\LXX\C-P-F\C-75 2016-07-06 08-29-26\VWD-AD (1-6)-95-5-1ML-SUL-
                220NM-40MIN.M (Sequence Method)
Last changed    : 7/6/2016 9:05:20 PM by SYSTEM
                (modified after loading)
Additional Info : Peak(s) manually integrated
  
```

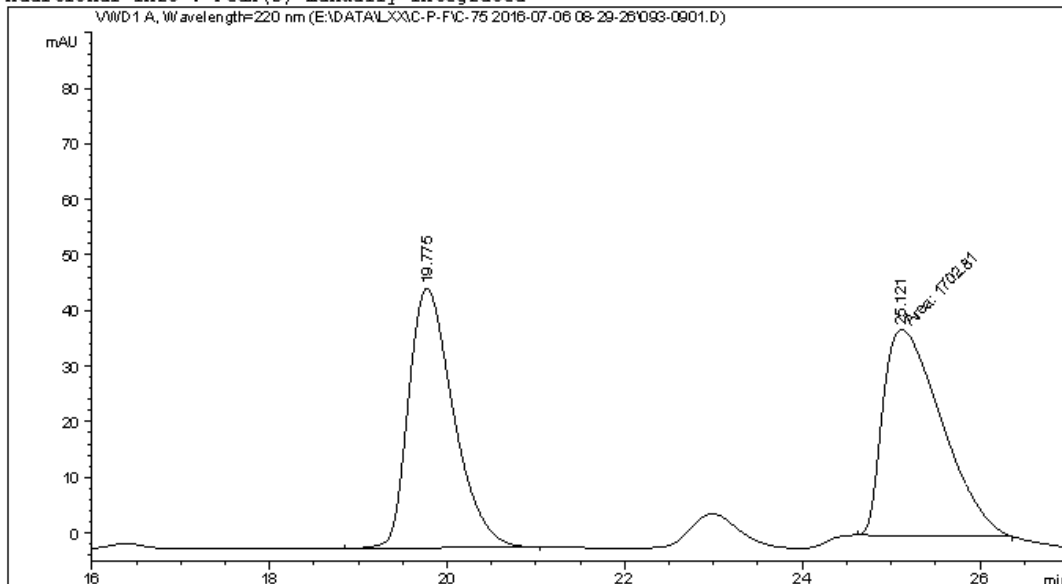

=====  
 Area Percent Report  
 =====

```

Sorted By      :      Signal
Multiplier     :      1.0000
Dilution       :      1.0000
Do not use Multiplier & Dilution Factor with ISTDs
  
```

Signal 1: VWD1 A, Wavelength=220 nm

| Peak # | RetTime [min] | Type | Width [min] | Area [mAU*s] | Height [mAU] | Area %  |
|--------|---------------|------|-------------|--------------|--------------|---------|
| 1      | 19.775        | BB   | 0.5414      | 1634.88477   | 46.70587     | 48.9824 |
| 2      | 25.121        | MM   | 0.7655      | 1702.81262   | 37.07634     | 51.0176 |

Totals :                                    3337.69739    83.78221

=====  
 \*\*\* End of Report \*\*\*

```

=====
Acq. Operator   : SYSTEM                      Seq. Line :   20
Acq. Instrument : 1260HPLC-VWD                Location  : Vial 97
Injection Date  : 7/6/2016 8:23:38 PM        Inj       :    1
                                           Inj Volume: 5.000 µl
Acq. Method     : E:\DATA\LXX\C-P-F\C-75 2016-07-06 08-29-26\VWD-AD (1-6)-95-5-1ML-SUL-
                220NM-40MIN.M
Last changed    : 7/6/2016 1:01:40 PM by SYSTEM
Analysis Method : E:\DATA\LXX\C-P-F\C-75 2016-07-06 08-29-26\VWD-AD (1-6)-95-5-1ML-SUL-
                220NM-40MIN.M (Sequence Method)
Last changed    : 7/6/2016 9:34:06 PM by SYSTEM
                (modified after loading)
Additional Info : Peak(s) manually integrated
  
```

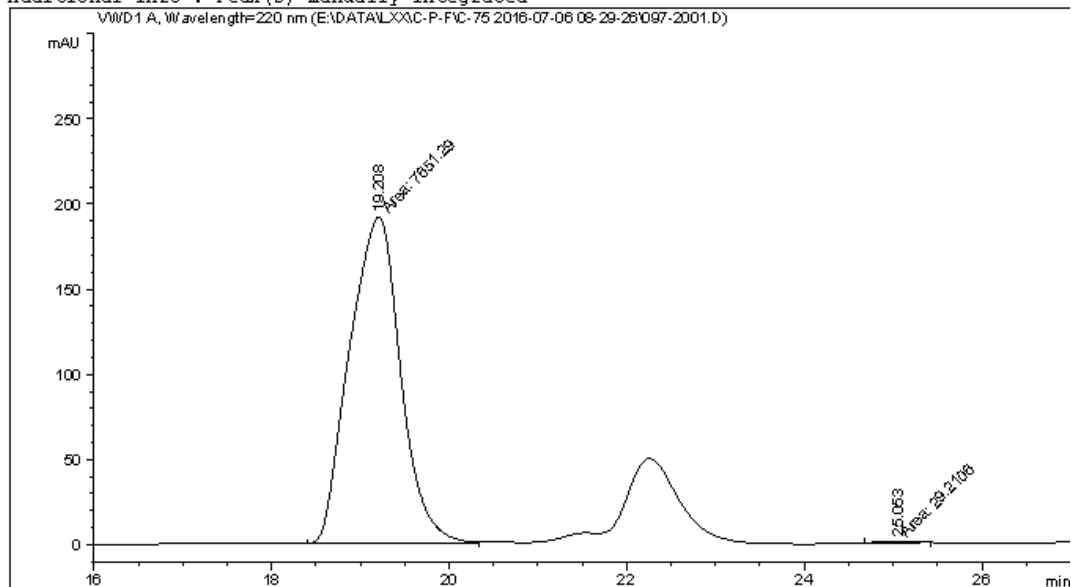

=====  
 Area Percent Report  
 =====

```

Sorted By      :      Signal
Multiplier     :      1.0000
Dilution      :      1.0000
Do not use Multiplier & Dilution Factor with ISTDs
  
```

Signal 1: VWD1 A, Wavelength=220 nm

| Peak # | RetTime [min] | Type | Width [min] | Area [mAU*s] | Height [mAU] | Area %  |
|--------|---------------|------|-------------|--------------|--------------|---------|
| 1      | 19.208        | MM   | 0.6645      | 7651.29248   | 191.89857    | 99.6197 |
| 2      | 25.053        | MM   | 0.4620      | 29.21063     | 1.05372      | 0.3803  |

Totals :                    7680.50311   192.95229

=====  
 \*\*\* End of Report \*\*\*

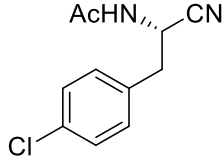

2e

Data File E:\DATA\LXX\C-P-CL\C-51-1-AD-2 2016-06-17 14-11-35\092-1201.D  
 Sample Name: C-51-1

```

=====
Acq. Operator   : SYSTEM                      Seq. Line : 12
Acq. Instrument : 1260HPLC-VWD                Location  : Vial 92
Injection Date  : 6/17/2016 8:39:19 PM        Inj       : 1
                                           Inj Volume: 3.000 µl
Acq. Method     : E:\DATA\LXX\C-P-CL\C-51-1-AD-2 2016-06-17 14-11-35\VWD-AD(1-6)-93-7-0.
                                           SML-3UL-220-60MIN.M
Last changed    : 6/17/2016 9:39:09 PM by SYSTEM
                                           (modified after loading)
Analysis Method : E:\DATA\LXX\C-P-CL\C-51-1-AD-2 2016-06-17 14-11-35\VWD-AD(1-6)-93-7-0.
                                           SML-3UL-220-60MIN.M (Sequence Method)
Last changed    : 6/17/2016 9:51:30 PM by SYSTEM
                                           (modified after loading)
Additional Info : Peak(s) manually integrated
  
```

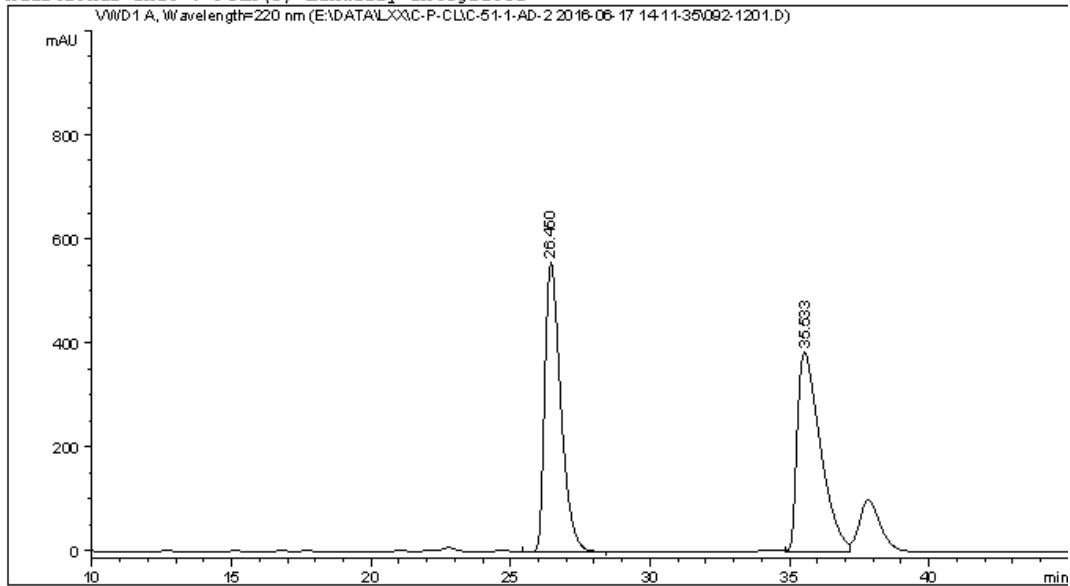

Area Percent Report

```

Sorted By      : Signal
Multiplier     : 1.0000
Dilution      : 1.0000
Do not use Multiplier & Dilution Factor with ISTDs
  
```

Signal 1: VWD1 A, Wavelength=220 nm

| Peak # | RetTime [min] | Type | Width [min] | Area [mAU*s] | Height [mAU] | Area %  |
|--------|---------------|------|-------------|--------------|--------------|---------|
| 1      | 26.450        | BB   | 0.6113      | 2.20937e4    | 555.21405    | 49.9703 |
| 2      | 35.533        | VV   | 0.8777      | 2.21199e4    | 383.03159    | 50.0297 |

Totals : 4.42136e4 938.24564



```

=====
Acq. Operator   : SYSTEM                               Seq. Line :    4
Acq. Instrument : 1260HPLC-VWD                         Location  : Vial 92
Injection Date  : 6/20/2016 11:28:22 AM              Inj       :    1
                                                    Inj Volume: 3.000 µl
Acq. Method     : E:\DATA\LXX\C-P-CL\C-53 2016-06-20 09-45-13\VWD-AD(1-6)-93-7-0.5ML-3UL-
                220-60MIN.M
Last changed    : 6/20/2016 11:32:12 AM by SYSTEM
                (modified after loading)
Analysis Method : E:\DATA\LXX\C-P-CL\C-53 2016-06-20 09-45-13\VWD-AD(1-6)-93-7-0.5ML-3UL-
                220-60MIN.M (Sequence Method)
Last changed    : 6/20/2016 12:34:52 PM by SYSTEM
                (modified after loading)
Additional Info : Peak(s) manually integrated
  
```

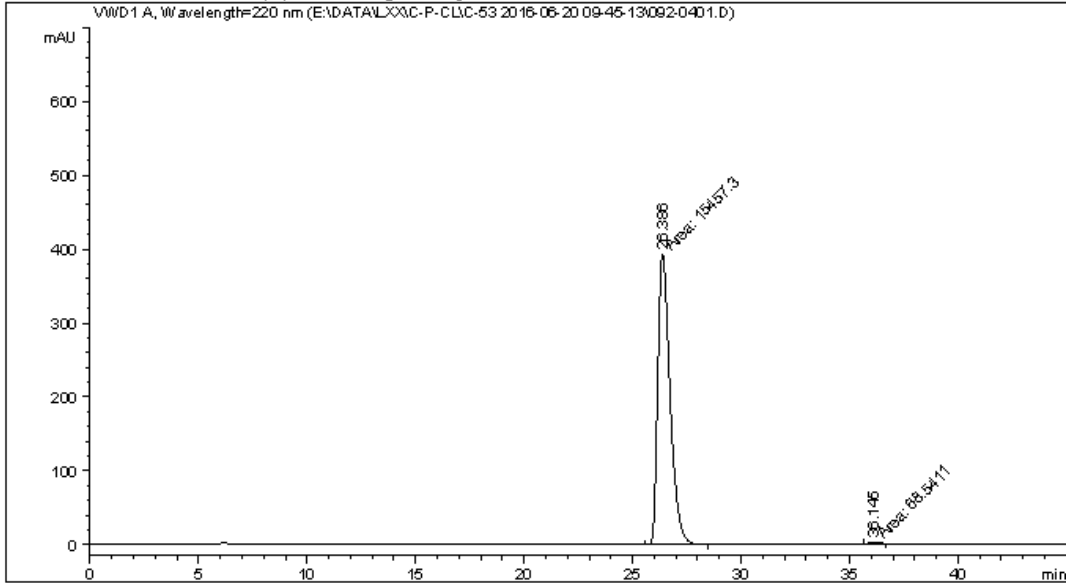

Area Percent Report

```

Sorted By      : Signal
Multiplier     : 1.0000
Dilution       : 1.0000
Do not use Multiplier & Dilution Factor with ISTDs
  
```

Signal 1: VWD1 A, Wavelength=220 nm

| Peak # | RetTime [min] | Type | Width [min] | Area [mAU*s] | Height [mAU] | Area %  |
|--------|---------------|------|-------------|--------------|--------------|---------|
| 1      | 26.386        | MM   | 0.6558      | 1.54573e4    | 392.85995    | 99.5585 |
| 2      | 36.145        | MM   | 0.5956      | 68.54111     | 1.91814      | 0.4415  |

Totals :                    1.55259e4   394.77809

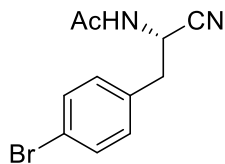

Data File E:\DATA\LXX\C-P-BR\C-57-AD 2016-06-23 08-57-35\092-0701.D  
 Sample Name: C-57-1-Rac

```

=====
Acq. Operator   : SYSTEM                      Seq. Line :    7
Acq. Instrument : 1260HPLC-VWD                Location  : Vial 92
Injection Date  : 6/23/2016 12:03:52 PM      Inj       :    1
                                           Inj Volume: 3.000 µl
Acq. Method     : E:\DATA\LXX\C-P-BR\C-57-AD 2016-06-23 08-57-35\VWD-AD(1-6)-93-7-0.6ML-
3UL-220-60MIN.M
Last changed    : 6/23/2016 11:30:34 AM by SYSTEM
Analysis Method : E:\DATA\LXX\C-P-BR\C-57-AD 2016-06-23 08-57-35\VWD-AD(1-6)-93-7-0.6ML-
3UL-220-60MIN.M (Sequence Method)
Last changed    : 6/23/2016 1:48:40 PM by SYSTEM
                 (modified after loading)
Additional Info : Peak(s) manually integrated
  
```

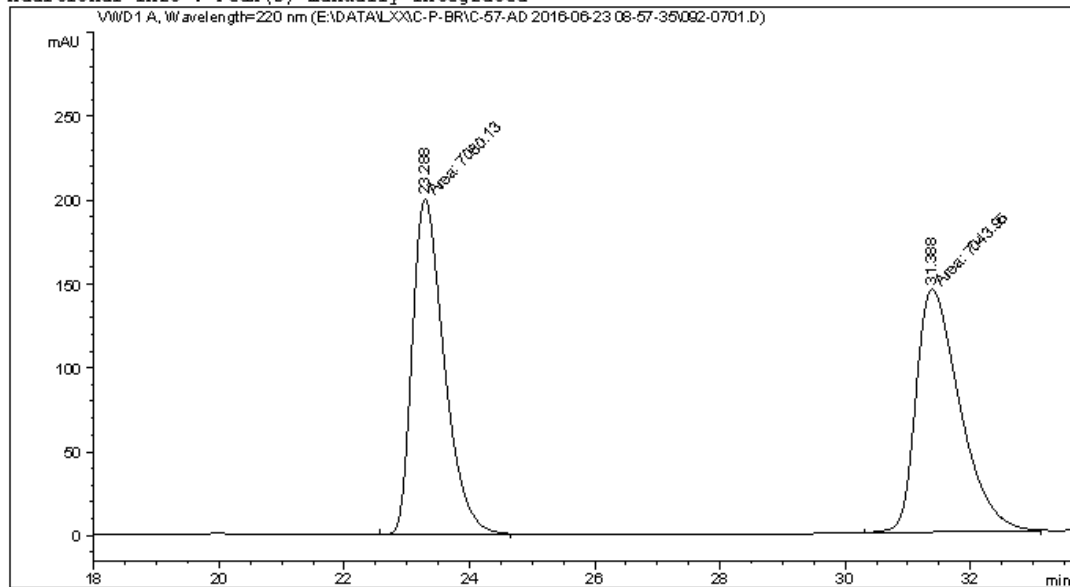

=====  
 Area Percent Report  
 =====

```

Sorted By       : Signal
Multiplier      : 1.0000
Dilution        : 1.0000
Do not use Multiplier & Dilution Factor with ISTDs
  
```

Signal 1: VWD1 A, Wavelength=220 nm

| Peak # | RetTime [min] | Type | Width [min] | Area [mAU*s] | Height [mAU] | Area %  |
|--------|---------------|------|-------------|--------------|--------------|---------|
| 1      | 23.288        | MM   | 0.5897      | 7080.12891   | 200.10556    | 50.1281 |
| 2      | 31.388        | MM   | 0.8100      | 7043.94824   | 144.94562    | 49.8719 |

Totals :                    1.41241e4   345.05118

=====  
 \*\*\* End of Report \*\*\*

```

=====
Acq. Operator   : SYSTEM                      Seq. Line :    8
Acq. Instrument : 1260HPLC-VWD                Location  : Vial 93
Injection Date  : 6/23/2016 1:04:36 PM       Inj       :    1
                                           Inj Volume: 3.000 µl
Acq. Method     : E:\DATA\LXX\C-P-BR\C-57-AD 2016-06-23 08-57-35\VWD-AD(1-6)-93-7-0.6ML-
3UL-220-60MIN.M
Last changed    : 6/23/2016 1:43:06 PM by SYSTEM
(modified after loading)
Analysis Method : E:\DATA\LXX\C-P-BR\C-57-AD 2016-06-23 08-57-35\VWD-AD(1-6)-93-7-0.6ML-
3UL-220-60MIN.M (Sequence Method)
Last changed    : 6/23/2016 1:50:44 PM by SYSTEM
(modified after loading)
Additional Info : Peak(s) manually integrated
  
```

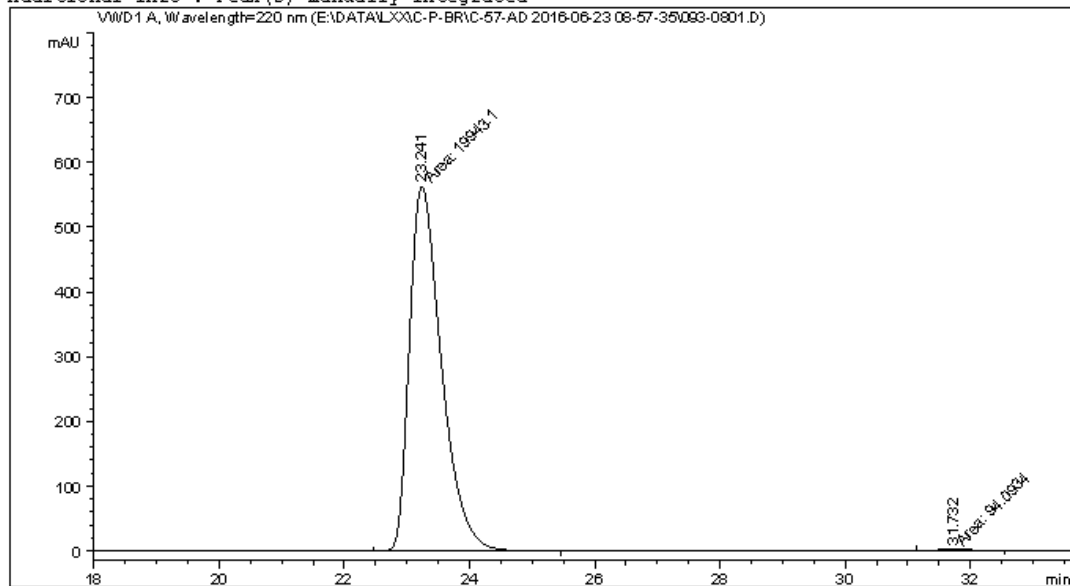

Area Percent Report

```

Sorted By      : Signal
Multiplier     : 1.0000
Dilution      : 1.0000
Do not use Multiplier & Dilution Factor with ISTDs
  
```

Signal 1: VWD1 A, Wavelength=220 nm

| Peak # | RetTime [min] | Type | Width [min] | Area [mAU*s] | Height [mAU] | Area %  |
|--------|---------------|------|-------------|--------------|--------------|---------|
| 1      | 23.241        | MM   | 0.5906      | 1.99431e4    | 562.81189    | 99.5304 |
| 2      | 31.732        | MM   | 0.7049      | 94.09338     | 2.22470      | 0.4696  |

Totals : 2.00372e4 565.03659

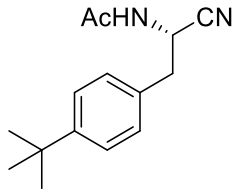

2g

Data File E:\DATA\LXX\C-P-TBU\C-56 2016-06-22 09-12-42\093-0201.D  
 Sample Name: C-54-1-Rac

```

=====
Acq. Operator   : SYSTEM                      Seq. Line :    2
Acq. Instrument : 1260HPLC-VWD                 Location  : Vial 93
Injection Date  : 6/22/2016 9:55:11 AM        Inj       :    1
                                           Inj Volume: 3.000 µl
Acq. Method     : E:\DATA\LXX\C-P-TBU\C-56 2016-06-22 09-12-42\VWD-AD(1-6)-95-5-1ML-3UL-
                220-40MIN.M
Last changed    : 6/22/2016 9:12:42 AM by SYSTEM
Analysis Method : E:\DATA\LXX\C-P-TBU\C-56 2016-06-22 09-12-42\VWD-AD(1-6)-95-5-1ML-3UL-
                220-40MIN.M (Sequence Method)
Last changed    : 6/22/2016 10:40:04 AM by SYSTEM
                (modified after loading)
Additional Info : Peak(s) manually integrated
=====
  
```

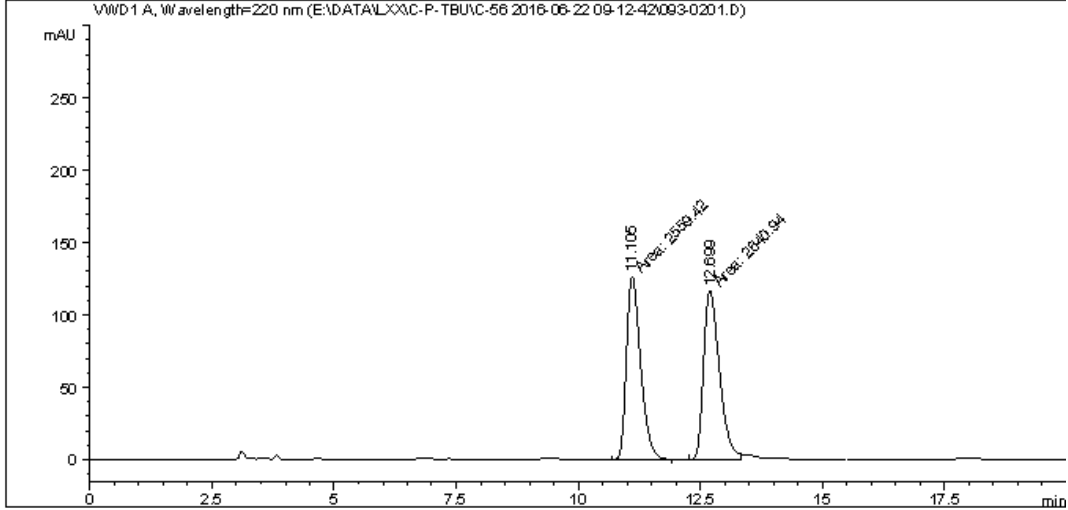

Area Percent Report

```

Sorted By      : Signal
Multiplier     : 1.0000
Dilution       : 1.0000
Do not use Multiplier & Dilution Factor with ISTDs
  
```

Signal 1: VWD1 A, Wavelength=220 nm

| Peak # | RetTime [min] | Type | Width [min] | Area [mAU*s] | Height [mAU] | Area %  |
|--------|---------------|------|-------------|--------------|--------------|---------|
| 1      | 11.105        | MM   | 0.3374      | 2559.41797   | 126.42804    | 49.2161 |
| 2      | 12.699        | MF   | 0.3778      | 2640.94482   | 116.50204    | 50.7839 |

Totals : 5200.36279 242.93008

\*\*\* End of Report \*\*\*

=====  
Acq. Operator : SYSTEM Seq. Line : 1  
Acq. Instrument : 1260HPLC-VWD Location : Vial 92  
Injection Date : 6/22/2016 9:14:27 AM Inj : 1  
 Inj Volume: 3.000 µl  
Acq. Method : E:\DATA\LXX\C-P-TBU\C-56 2016-06-22 09-12-42\VWD-AD(1-6)-95-5-1ML-3UL-  
220-40MIN.M  
Last changed : 6/22/2016 9:12:42 AM by SYSTEM  
Analysis Method : E:\DATA\LXX\C-P-TBU\C-56 2016-06-22 09-12-42\VWD-AD(1-6)-95-5-1ML-3UL-  
220-40MIN.M (Sequence Method)  
Last changed : 6/22/2016 10:04:26 AM by SYSTEM  
(modified after loading)  
Additional Info : Peak(s) manually integrated

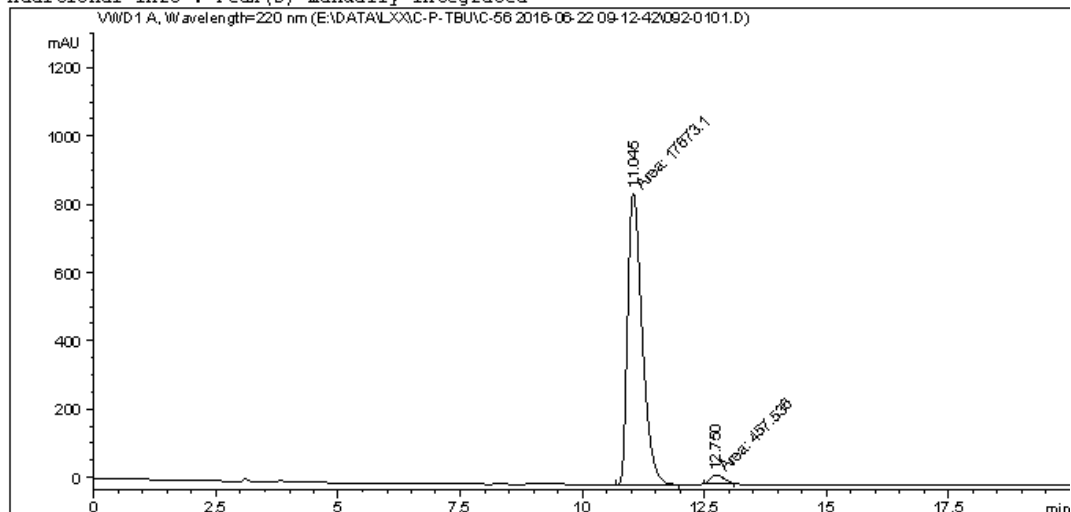

=====  
Area Percent Report  
=====

Sorted By : Signal  
Multiplier : 1.0000  
Dilution : 1.0000  
Do not use Multiplier & Dilution Factor with ISTDs

Signal 1: VWD1 A, Wavelength=220 nm

| Peak # | RetTime [min] | Type | Width [min] | Area [mAU*s] | Height [mAU] | Area %  |
|--------|---------------|------|-------------|--------------|--------------|---------|
| 1      | 11.045        | MM   | 0.3443      | 1.76731e4    | 855.56940    | 97.4765 |
| 2      | 12.750        | MM   | 0.3244      | 457.53632    | 23.50762     | 2.5235  |

Totals :                    1.81307e4   879.07701

=====  
\*\*\* End of Report \*\*\*

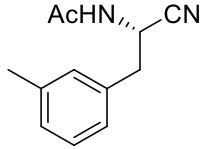

2h

Data File E:\DATA\LXX\Wfy-2-P-CL\C-69 2016-07-01 09-09-55\094-1301.D  
 Sample Name: m-CH3-Rac

```

=====
Acq. Operator   : SYSTEM                      Seq. Line :   13
Acq. Instrument : 1260HPLC-VWD                Location  : Vial 94
Injection Date  : 7/1/2016 5:35:11 PM         Inj       :    1
                                           Inj Volume: 3.000 µl
Acq. Method     : E:\DATA\LXX\Wfy-2-P-CL\C-69 2016-07-01 09-09-55\VWD-AD(1-6)-94-6-0.
                                           6ML3UL-220-60MIN.M
Last changed    : 7/1/2016 6:18:01 PM by SYSTEM
                                           (modified after loading)
Analysis Method : E:\DATA\LXX\Wfy-2-P-CL\C-69 2016-07-01 09-09-55\VWD-AD(1-6)-94-6-0.
                                           6ML3UL-220-60MIN.M (Sequence Method)
Last changed    : 7/1/2016 7:27:34 PM by SYSTEM
                                           (modified after loading)
Additional Info : Peak(s) manually integrated
  
```

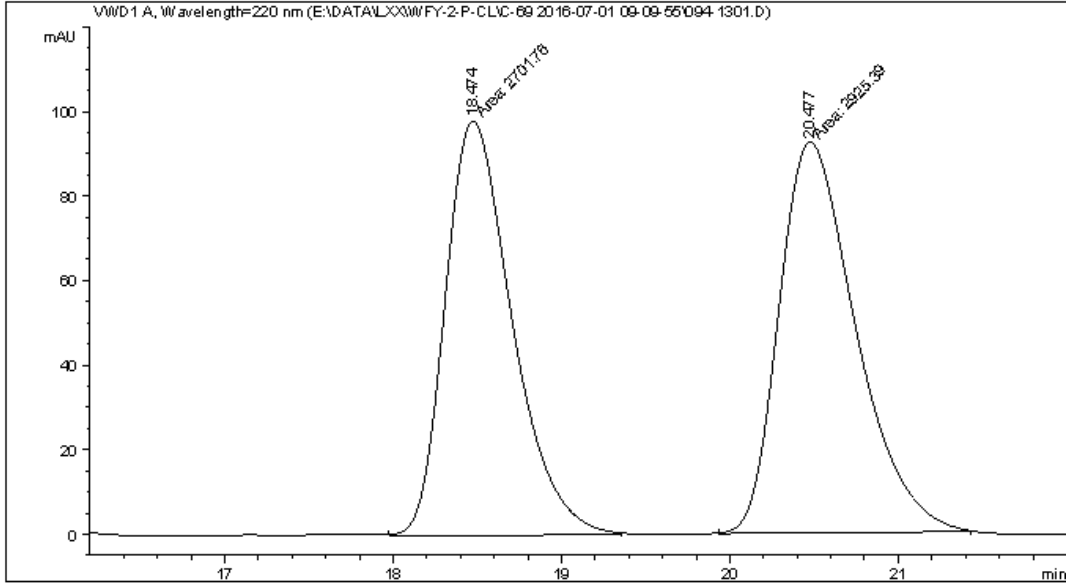

Area Percent Report

```

Sorted By      :      Signal
Multiplier     :      1.0000
Dilution      :      1.0000
Do not use Multiplier & Dilution Factor with ISTDs
  
```

Signal 1: VWD1 A, Wavelength=220 nm

| Peak # | RetTime [min] | Type | Width [min] | Area [mAU*s] | Height [mAU] | Area %  |
|--------|---------------|------|-------------|--------------|--------------|---------|
| 1      | 18.474        | MM   | 0.4593      | 2701.75952   | 98.04378     | 48.0129 |
| 2      | 20.477        | MM   | 0.5279      | 2925.39233   | 92.35935     | 51.9871 |

Totals : 5627.15186 190.40313

```

=====
Acq. Operator   : SYSTEM                      Seq. Line : 11
Acq. Instrument : 1260HPLC-VWD                Location  : Vial 97
Injection Date  : 7/1/2016 4:18:33 PM         Inj       : 1
                                           Inj Volume: 3.000 µl
Acq. Method     : E:\DATA\LXX\Wfy-2-P-CL\C-69 2016-07-01 09-09-55\VWD-AD(1-6)-94-6-0.
                                           6ML3UL-220-60MIN.M
Last changed    : 7/1/2016 12:14:50 PM by SYSTEM
Analysis Method : E:\DATA\LXX\Wfy-2-P-CL\C-69 2016-07-01 09-09-55\VWD-AD(1-6)-94-6-0.
                                           6ML3UL-220-60MIN.M (Sequence Method)
Last changed    : 7/1/2016 7:30:09 PM by SYSTEM
                                           (modified after loading)
Additional Info  : Peak(s) manually integrated
  
```

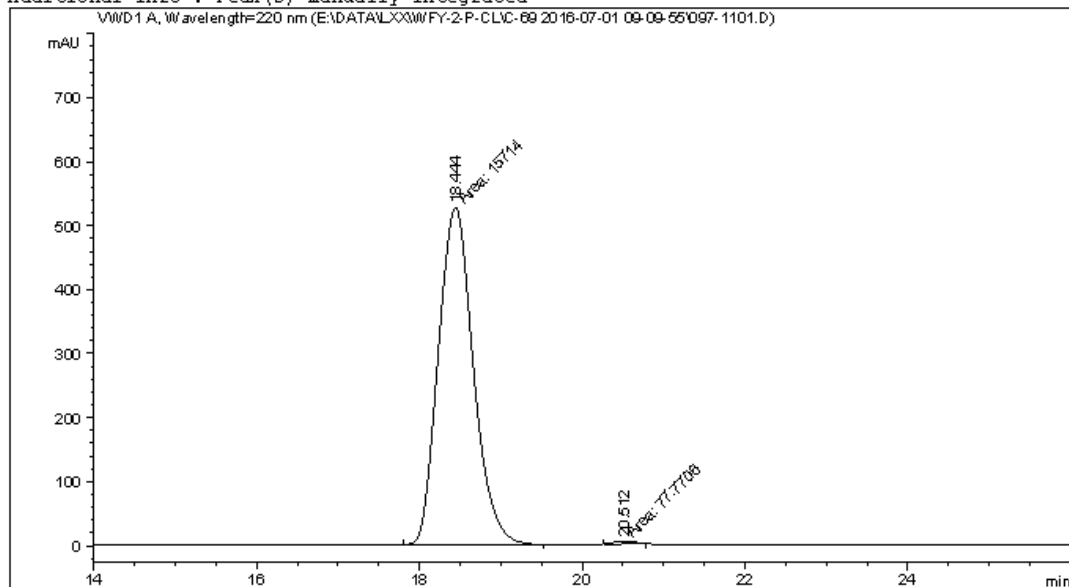

=====  
 Area Percent Report  
 =====

```

Sorted By      :      Signal
Multiplier     :      1.0000
Dilution      :      1.0000
Do not use Multiplier & Dilution Factor with ISTDs
  
```

Signal 1: VWD1 A, Wavelength=220 nm

| Peak # | RetTime [min] | Type | Width [min] | Area [mAU*s] | Height [mAU] | Area %  |
|--------|---------------|------|-------------|--------------|--------------|---------|
| 1      | 18.444        | MM   | 0.4971      | 1.57140e4    | 526.88458    | 99.5075 |
| 2      | 20.512        | MM   | 0.3311      | 77.77057     | 3.91464      | 0.4925  |

Totals :                    1.57917e4   530.79923

=====  
 \*\*\* End of Report \*\*\*

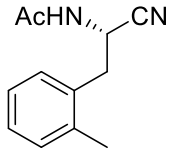

Data File E:\DATA\LXX\C-P-F\C-75 2016-07-06 08-29-26\092-1601.D  
 Sample Name: o-CH3-Rac

```

=====
Acq. Operator   : SYSTEM                      Seq. Line :   16
Acq. Instrument : 1260HPLC-VWD                Location  : Vial 92
Injection Date  : 7/6/2016 4:40:23 PM        Inj       :    1
                                           Inj Volume: 5.000 µl
Acq. Method     : E:\DATA\LXX\C-P-F\C-75 2016-07-06 08-29-26\VWD-AD (1-6)-97-3-0.5ML-5UL-
                220NM-70MIN.M
Last changed    : 7/6/2016 5:49:03 PM by SYSTEM
                (modified after loading)
Analysis Method : E:\DATA\LXX\C-P-F\C-75 2016-07-06 08-29-26\VWD-AD (1-6)-97-3-0.5ML-5UL-
                220NM-70MIN.M (Sequence Method)
Last changed    : 7/6/2016 7:38:58 PM by SYSTEM
                (modified after loading)
Additional Info : Peak(s) manually integrated
  
```

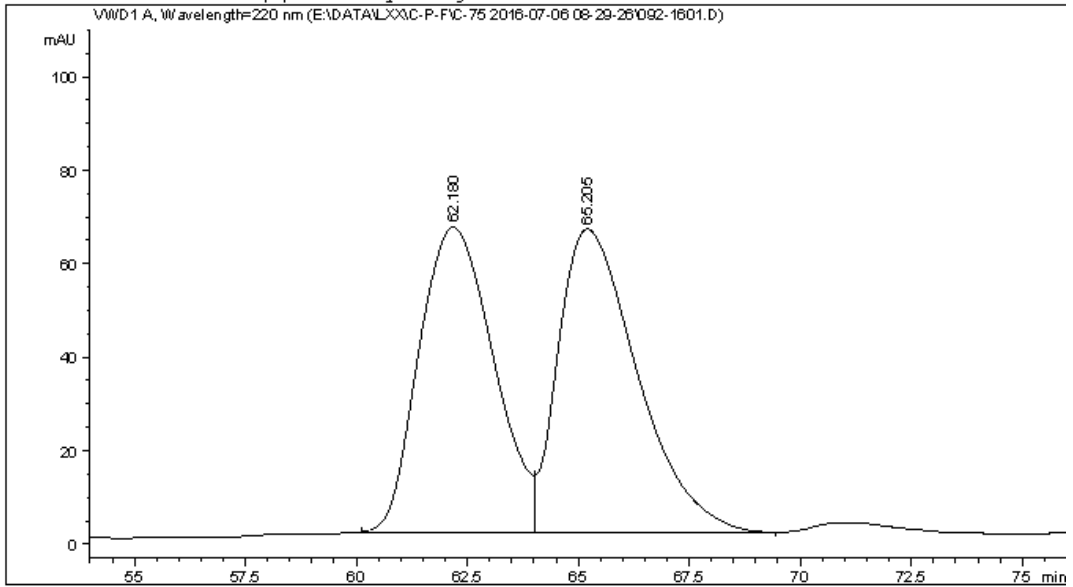

```

=====
                          Area Percent Report
=====
  
```

```

Sorted By      :      Signal
Multiplier     :      1.0000
Dilution      :      1.0000
Do not use Multiplier & Dilution Factor with ISTDs
  
```

Signal 1: VWD1 A, Wavelength=220 nm

| Peak # | RetTime [min] | Type | Width [min] | Area [mAU*s] | Height [mAU] | Area %  |
|--------|---------------|------|-------------|--------------|--------------|---------|
| 1      | 62.180        | BV   | 1.7259      | 7588.88672   | 65.24884     | 48.5403 |
| 2      | 65.205        | VB   | 1.8922      | 8045.31006   | 64.85965     | 51.4597 |

Totals :                    1.56342e4    130.10849



=====  
Acq. Operator : SYSTEM Seq. Line : 17  
Acq. Instrument : 1260HPLC-VWD Location : Vial 94  
Injection Date : 7/6/2016 6:01:09 PM Inj : 1  
 Inj Volume: 5.000 µl  
Acq. Method : E:\DATA\LXX\C-P-F\C-75 2016-07-06 08-29-26\VWD-AD (1-6)-97-3-0.5ML-5UL-  
220NM-70MIN.M  
Last changed : 7/6/2016 5:49:03 PM by SYSTEM  
Analysis Method : E:\DATA\LXX\C-P-F\C-75 2016-07-06 08-29-26\VWD-AD (1-6)-97-3-0.5ML-5UL-  
220NM-70MIN.M (Sequence Method)  
Last changed : 7/6/2016 7:37:28 PM by SYSTEM  
(modified after loading)  
Additional Info : Peak(s) manually integrated

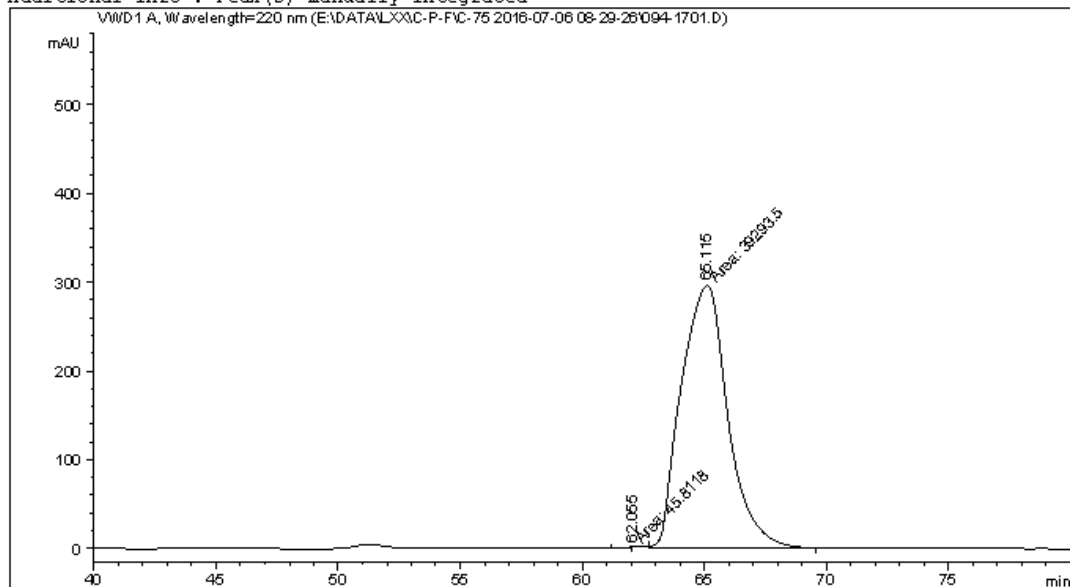

=====  
Area Percent Report  
=====

Sorted By : Signal  
Multiplier : 1.0000  
Dilution : 1.0000  
Do not use Multiplier & Dilution Factor with ISTDs

Signal 1: VWD1 A, Wavelength=220 nm

| Peak # | RetTime [min] | Type | Width [min] | Area [mAU*s] | Height [mAU] | Area %  |
|--------|---------------|------|-------------|--------------|--------------|---------|
| 1      | 62.055        | MM   | 0.4912      | 45.81175     | 1.55428      | 0.1165  |
| 2      | 65.115        | FM   | 2.2110      | 3.92935e4    | 296.19366    | 99.8835 |

Totals : 3.93393e4 297.74794

=====  
\*\*\* End of Report \*\*\*

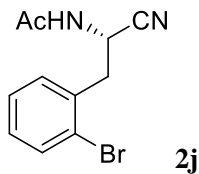

Data File E:\DATA\WFY\WFY-AC4\AD-0-F-95-5-0.5) 2016-07-15 11-31-57\092-0401.D  
 Sample Name: C-o-Br-Rac

```

=====
Acq. Operator   : SYSTEM                      Seq. Line :    4
Acq. Instrument : 1260HPLC-VWD                Location  : Vial 92
Injection Date  : 7/15/2016 1:16:52 PM       Inj       :    1
                                           Inj Volume: 3.000 µl
Acq. Method     : E:\DATA\WFY\WFY-AC4\AD-0-F-95-5-0.5) 2016-07-15 11-31-57\VWD-AD(1-6)-95-
5-0.8ML-3UL-220NM-35MIN.M
Last changed    : 7/15/2016 1:54:31 PM by SYSTEM
                 (modified after loading)
Analysis Method : E:\DATA\WFY\WFY-AC4\AD-0-F-95-5-0.5) 2016-07-15 11-31-57\VWD-AD(1-6)-95-
5-0.8ML-3UL-220NM-35MIN.M (Sequence Method)
Last changed    : 7/15/2016 2:38:59 PM by SYSTEM
                 (modified after loading)
Additional Info : Peak(s) manually integrated
  
```

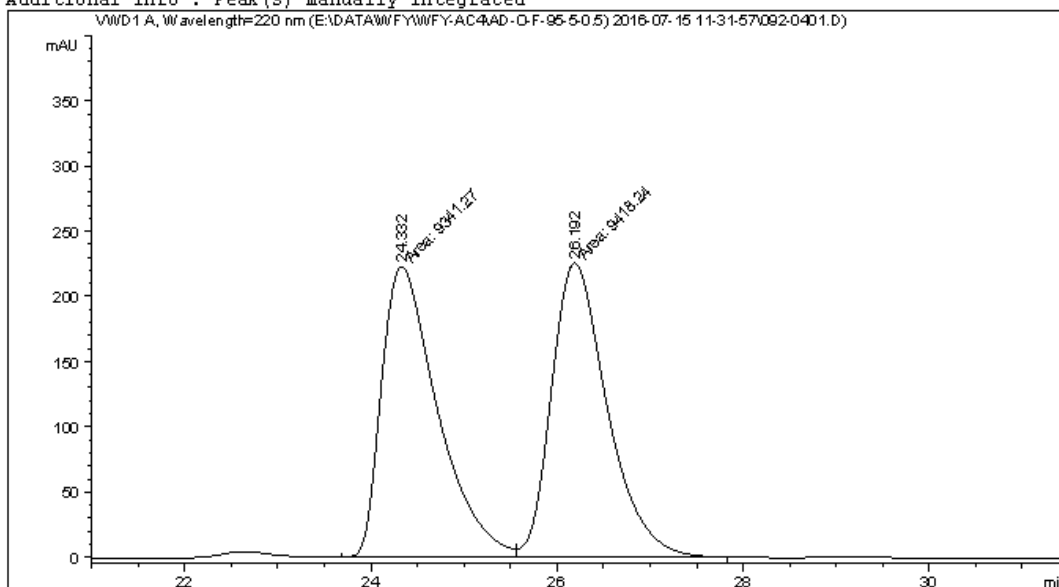

Area Percent Report

```

Sorted By      : Signal
Multiplier     : 1.0000
Dilution       : 1.0000
Do not use Multiplier & Dilution Factor with ISTDs
  
```

Signal 1: VWD1 A, Wavelength=220 nm

| Peak # | RetTime [min] | Type | Width [min] | Area [mAU*s] | Height [mAU] | Area %  |
|--------|---------------|------|-------------|--------------|--------------|---------|
| 1      | 24.332        | MF   | 0.6978      | 9341.26563   | 223.11790    | 49.7948 |
| 2      | 26.192        | FM   | 0.6951      | 9418.24121   | 225.81535    | 50.2052 |

Totals : 1.87595e4 448.93326

```
=====
Acq. Operator   : SYSTEM                      Seq. Line :    5
Acq. Instrument : 1260HPLC-VWD                Location  : Vial 93
Injection Date  : 7/15/2016 1:55:15 PM       Inj       :    1
                                           Inj Volume: 3.000 µl
Acq. Method     : E:\DATA\WFY\WFY-AC4\AD-0-F-95-5-0.5) 2016-07-15 11-31-57\VWD-AD(1-6)-95-
                  5-0.8ML-3UL-220NM-35MIN.M
Last changed    : 7/15/2016 2:04:36 PM by SYSTEM
                  (modified after loading)
Analysis Method : E:\DATA\WFY\WFY-AC4\AD-0-F-95-5-0.5) 2016-07-15 11-31-57\VWD-AD(1-6)-95-
                  5-0.8ML-3UL-220NM-35MIN.M (Sequence Method)
Last changed    : 7/15/2016 2:42:09 PM by SYSTEM
                  (modified after loading)
Additional Info : Peak(s) manually integrated
=====
```

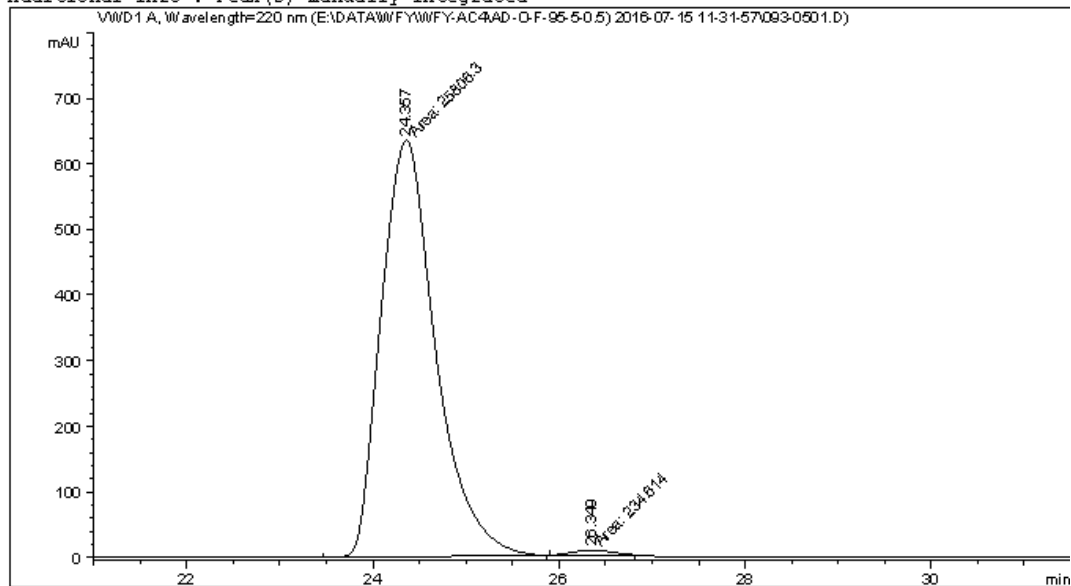

=====  
Area Percent Report  
=====

Sorted By : Signal  
Multiplier : 1.0000  
Dilution : 1.0000  
Do not use Multiplier & Dilution Factor with ISTDs

Signal 1: VWD1 A, Wavelength=220 nm

| Peak # | RetTime [min] | Type | Width [min] | Area [mAU*s] | Height [mAU] | Area %  |
|--------|---------------|------|-------------|--------------|--------------|---------|
| 1      | 24.357        | MM   | 0.6774      | 2.58063e4    | 634.96436    | 99.0991 |
| 2      | 26.349        | MM   | 0.5011      | 234.61411    | 7.80281      | 0.9009  |

Totals :                    2.60409e4    642.76717

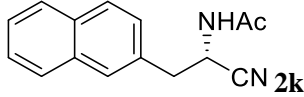

Data File E:\DATA\LXX\C-P-F\C-73&74 2016-07-05 07-49-31\096-0901.D  
 Sample Name: 2-NAI-Rac

```

=====
Acq. Operator   : SYSTEM                      Seq. Line :    9
Acq. Instrument : 1260HPLC-VWD                 Location  : Vial 96
Injection Date  : 7/5/2016 1:14:51 PM        Inj       :    1
                                           Inj Volume: 3.000 µl
Acq. Method     : E:\DATA\LXX\C-P-F\C-73&74 2016-07-05 07-49-31\VWD-AD (1-6)-95-5-1ML-3UL-
                  220-40MIN.M
Last changed    : 7/5/2016 7:49:31 AM by SYSTEM
Analysis Method : E:\DATA\LXX\C-P-F\C-73&74 2016-07-05 07-49-31\VWD-AD (1-6)-95-5-1ML-3UL-
                  220-40MIN.M (Sequence Method)
Last changed    : 7/5/2016 2:46:13 PM by SYSTEM
                  (modified after loading)
Additional Info : Peak(s) manually integrated
  
```

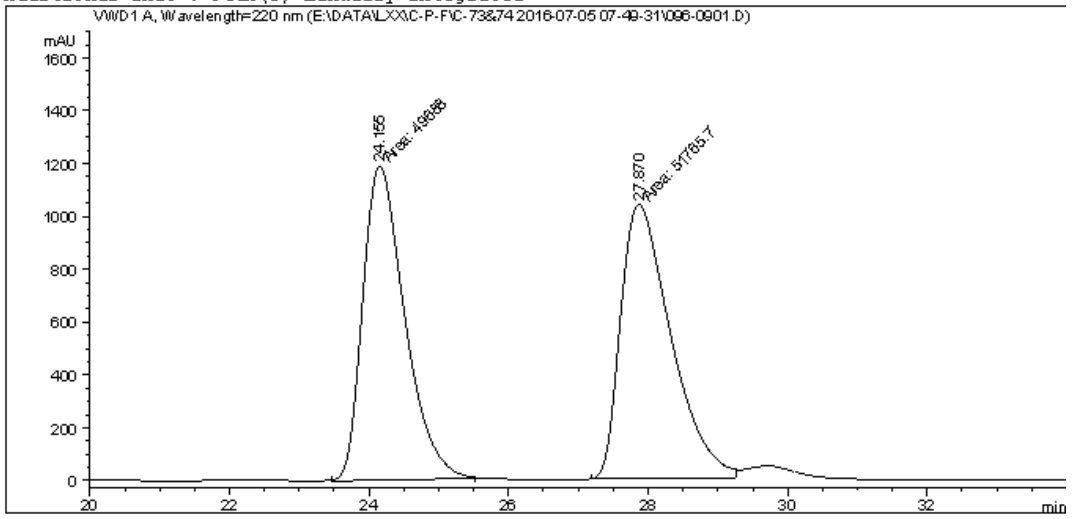

Area Percent Report

```

Sorted By      : Signal
Multiplier     : 1.0000
Dilution       : 1.0000
Do not use Multiplier & Dilution Factor with ISTDs
  
```

Signal 1: VWD1 A, Wavelength=220 nm

| Peak # | RetTime [min] | Type | Width [min] | Area [mAU*s] | Height [mAU] | Area %  |
|--------|---------------|------|-------------|--------------|--------------|---------|
| 1      | 24.155        | MM   | 0.6965      | 4.96880e4    | 1189.06067   | 48.9760 |
| 2      | 27.870        | MM   | 0.8320      | 5.17657e4    | 1036.96191   | 51.0240 |

Totals : 1.01454e5 2226.02258

\*\*\* End of Report \*\*\*

```

=====
Acq. Operator   : SYSTEM                      Seq. Line :   13
Acq. Instrument : 1260HPLC-VWD                Location  : Vial 99
Injection Date  : 7/5/2016 3:58:00 PM        Inj       :    1
                                           Inj Volume: 3.000 µl
Acq. Method     : E:\DATA\LXX\C-P-F\C-73&74 2016-07-05 07-49-31\VWD-AD(1-6)-95-5-1ML-3UL-
                220-40MIN.M
Last changed    : 7/5/2016 7:49:31 AM by SYSTEM
Analysis Method : E:\DATA\LXX\C-P-F\C-73&74 2016-07-05 07-49-31\VWD-AD(1-6)-95-5-1ML-3UL-
                220-40MIN.M (Sequence Method)
Last changed    : 7/5/2016 4:43:51 PM by SYSTEM
                (modified after loading)
Additional Info : Peak(s) manually integrated
  
```

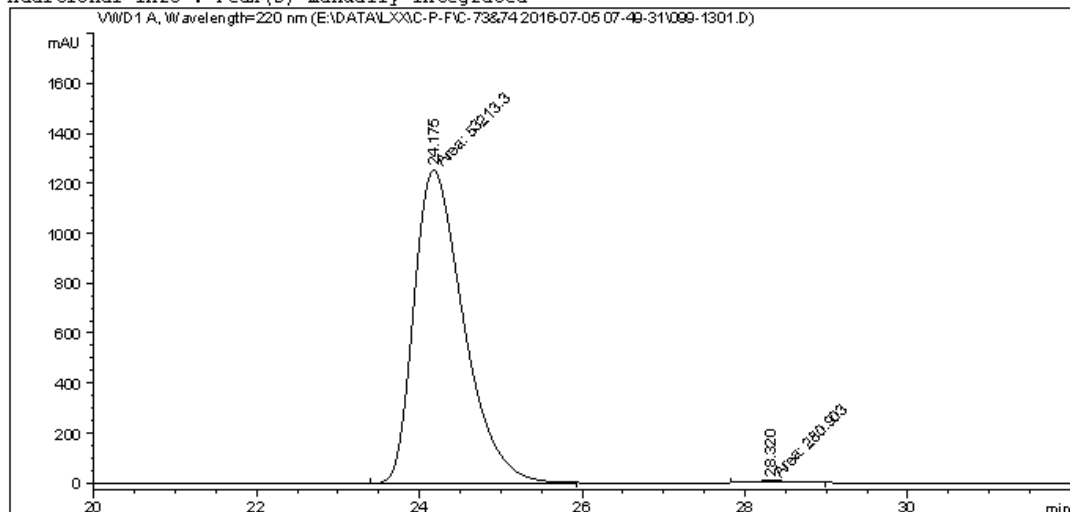

=====  
 Area Percent Report  
 =====

```

Sorted By      :      Signal
Multiplier     :      1.0000
Dilution       :      1.0000
Do not use Multiplier & Dilution Factor with ISTDs
  
```

Signal 1: VWD1 A, Wavelength=220 nm

| Peak # | RetTime [min] | Type | Width [min] | Area [mAU*s] | Height [mAU] | Area %  |
|--------|---------------|------|-------------|--------------|--------------|---------|
| 1      | 24.175        | MM   | 0.7068      | 5.32133e4    | 1254.77527   | 99.4749 |
| 2      | 28.320        | MM   | 0.6518      | 280.90329    | 7.18264      | 0.5251  |

Totals :                    5.34942e4 1261.95791

=====  
 \*\*\* End of Report \*\*\*

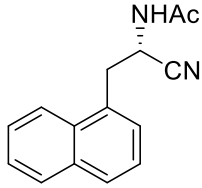

21

Data File E:\DATA\LXX\C-1-NAI\C-59-1-AD 2016-06-25 11-04-16\092-0301.D  
 Sample Name: C-59-1

```

=====
Acq. Operator   : SYSTEM                      Seq. Line :    3
Acq. Instrument : 1260HPLC-VWD                Location  : Vial 92
Injection Date  : 6/25/2016 11:36:36 AM      Inj       :    1
                                           Inj Volume: 3.000 µl
Acq. Method     : E:\DATA\LXX\C-1-NAI\C-59-1-AD 2016-06-25 11-04-16\VWD-AD(1-6)-95-5-1ML-
3UL-220-40MIN.M
Last changed    : 6/25/2016 11:04:17 AM by SYSTEM
Analysis Method : E:\DATA\LXX\C-1-NAI\C-59-1-AD 2016-06-25 11-04-16\VWD-AD(1-6)-95-5-1ML-
3UL-220-40MIN.M (Sequence Method)
Last changed    : 6/25/2016 12:21:03 PM by SYSTEM
                 (modified after loading)
Additional Info : Peak(s) manually integrated
  
```

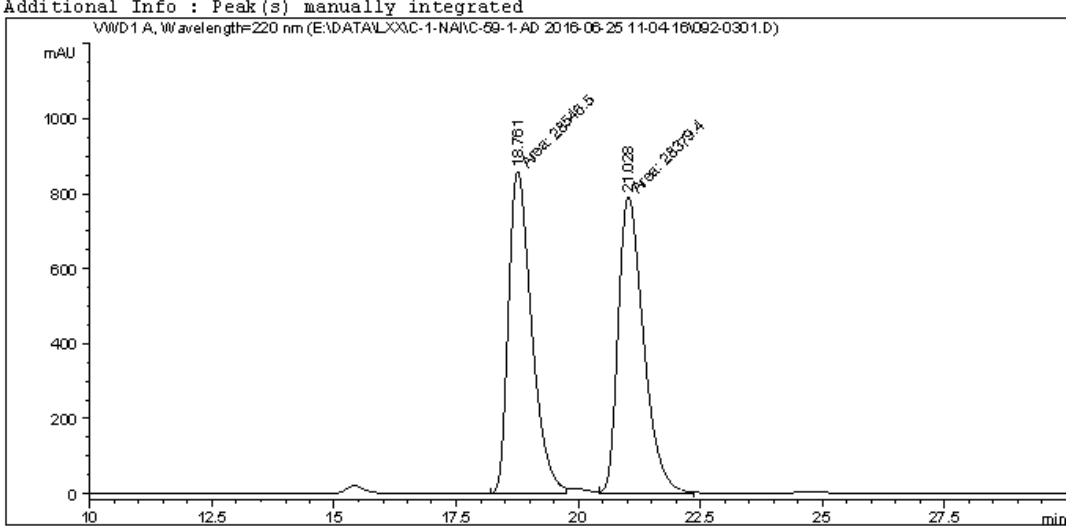

Area Percent Report

```

Sorted By      : Signal
Multiplier     : 1.0000
Dilution      : 1.0000
Do not use Multiplier & Dilution Factor with ISTDs
  
```

Signal 1: VWD1 A, Wavelength=220 nm

| Peak # | RetTime [min] | Type | Width [min] | Area [mAU*s] | Height [mAU] | Area %  |
|--------|---------------|------|-------------|--------------|--------------|---------|
| 1      | 18.761        | MM   | 0.5531      | 2.85465e4    | 860.14276    | 50.1468 |
| 2      | 21.028        | MM   | 0.6000      | 2.83794e4    | 788.28717    | 49.8532 |

Totals : 5.69259e4 1648.42993

\*\*\* End of Report \*\*\*

```

=====
Acq. Operator   : SYSTEM                      Seq. Line :    4
Acq. Instrument : 1260HPLC-VWD                Location  : Vial 92
Injection Date  : 6/26/2016 1:06:48 PM       Inj       :    1
                                           Inj Volume: 3.000 µl
Acq. Method     : E:\DATA\LXX\C-1-NAI\C-63 2016-06-26 11-23-47\VWD-AD(1-6)-95-5-1ML-3UL-
                220-40MIN.M
Last changed    : 6/26/2016 1:45:49 PM by SYSTEM
                (modified after loading)
Analysis Method : E:\DATA\LXX\C-1-NAI\C-63 2016-06-26 11-23-47\VWD-AD(1-6)-95-5-1ML-3UL-
                220-40MIN.M (Sequence Method)
Last changed    : 6/26/2016 1:55:44 PM by SYSTEM
                (modified after loading)
Additional Info : Peak(s) manually integrated
  
```

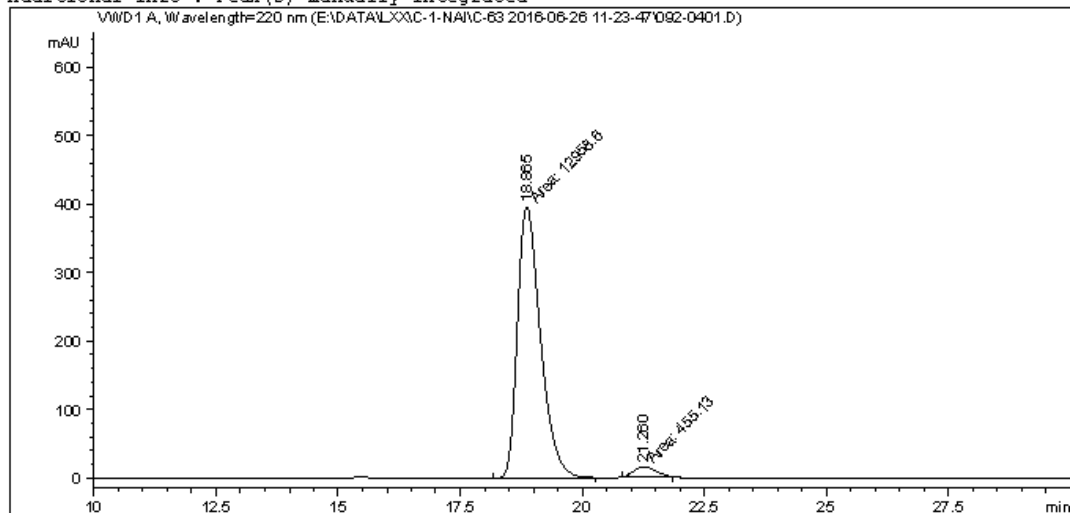

=====  
 Area Percent Report  
 =====

```

Sorted By      :      Signal
Multiplier     :      1.0000
Dilution       :      1.0000
Do not use Multiplier & Dilution Factor with ISTDs
  
```

Signal 1: VWD1 A, Wavelength=220 nm

| Peak # | RetTime [min] | Type | Width [min] | Area [mAU*s] | Height [mAU] | Area %  |
|--------|---------------|------|-------------|--------------|--------------|---------|
| 1      | 18.865        | MM   | 0.5455      | 1.29586e4    | 395.89621    | 96.6070 |
| 2      | 21.260        | MM   | 0.5098      | 455.12979    | 14.87798     | 3.3930  |

Totals :                    1.34137e4   410.77419

=====  
 \*\*\* End of Report \*\*\*

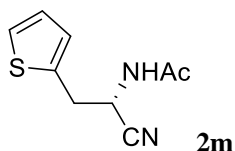

Data File E:\DATA\LXX\WFY-2-P-CL\C-69 2016-07-01 09-09-55\093-2801.D  
 Sample Name: Saifen-Rac

```

=====
Acq. Operator   : SYSTEM                      Seq. Line : 28
Acq. Instrument : 1260HPLC-VWD                Location  : Vial 93
Injection Date  : 7/2/2016 12:24:59 AM       Inj       : 1
                                           Inj Volume: 3.000 µl
Acq. Method     : E:\DATA\LXX\WFY-2-P-CL\C-69 2016-07-01 09-09-55\VWD-AD(1-6)-94-6-0.
                                           6ML3UL-220-60MIN.M
Last changed    : 7/1/2016 12:14:50 PM by SYSTEM
Analysis Method : E:\DATA\LXX\WFY-2-P-CL\C-69 2016-07-01 09-09-55\VWD-AD(1-6)-94-6-0.
                                           6ML3UL-220-60MIN.M (Sequence Method)
Last changed    : 7/2/2016 8:51:11 AM by SYSTEM
                                           (modified after loading)
Additional Info : Peak(s) manually integrated
  
```

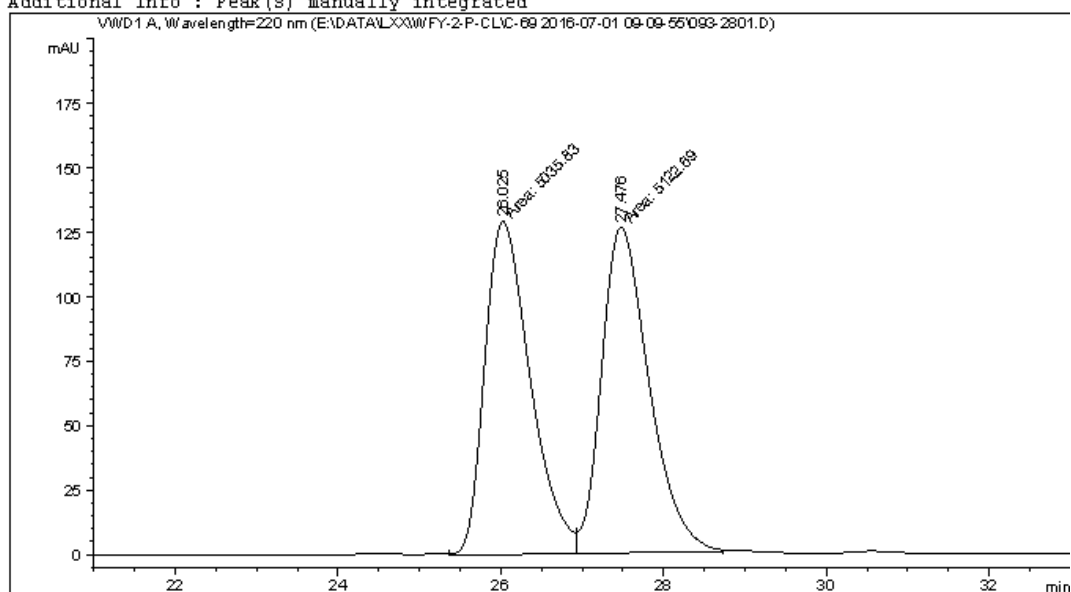

=====  
 Area Percent Report  
 =====

```

Sorted By      : Signal
Multiplier     : 1.0000
Dilution      : 1.0000
Do not use Multiplier & Dilution Factor with ISTDs
  
```

Signal 1: VWD1 A, Wavelength=220 nm

| Peak # | RetTime [min] | Type | Width [min] | Area [mAU*s] | Height [mAU] | Area %  |
|--------|---------------|------|-------------|--------------|--------------|---------|
| 1      | 26.025        | MF   | 0.6494      | 5035.82959   | 129.25130    | 49.5725 |
| 2      | 27.476        | FM   | 0.6756      | 5122.69287   | 126.36832    | 50.4275 |

Totals : 1.01585e4 255.61961

=====  
 \*\*\* End of Report \*\*\*



Data File E:\DATA\LXX\WVY-2-P-CL\C-69 2016-07-01 09-09-55\096-1601.D  
Sample Name: C-69-2

```
=====
Acq. Operator   : SYSTEM                      Seq. Line : 16
Acq. Instrument : 1260HPLC-VWD              Location  : Vial 96
Injection Date  : 7/1/2016 7:35:23 PM      Inj       : 1
                                           Inj Volume: 3.000 µl
Acq. Method     : E:\DATA\LXX\WVY-2-P-CL\C-69 2016-07-01 09-09-55\VWD-AD(1-6)-94-6-0.
                    6ML3UL-220-60MIN.M
Last changed    : 7/1/2016 7:36:30 PM by SYSTEM
                    (modified after loading)
Analysis Method : E:\DATA\LXX\WVY-2-P-CL\C-69 2016-07-01 09-09-55\VWD-AD(1-6)-94-6-0.
                    6ML3UL-220-60MIN.M (Sequence Method)
Last changed    : 7/2/2016 8:52:48 AM by SYSTEM
                    (modified after loading)
Additional Info : Peak(s) manually integrated
=====
```

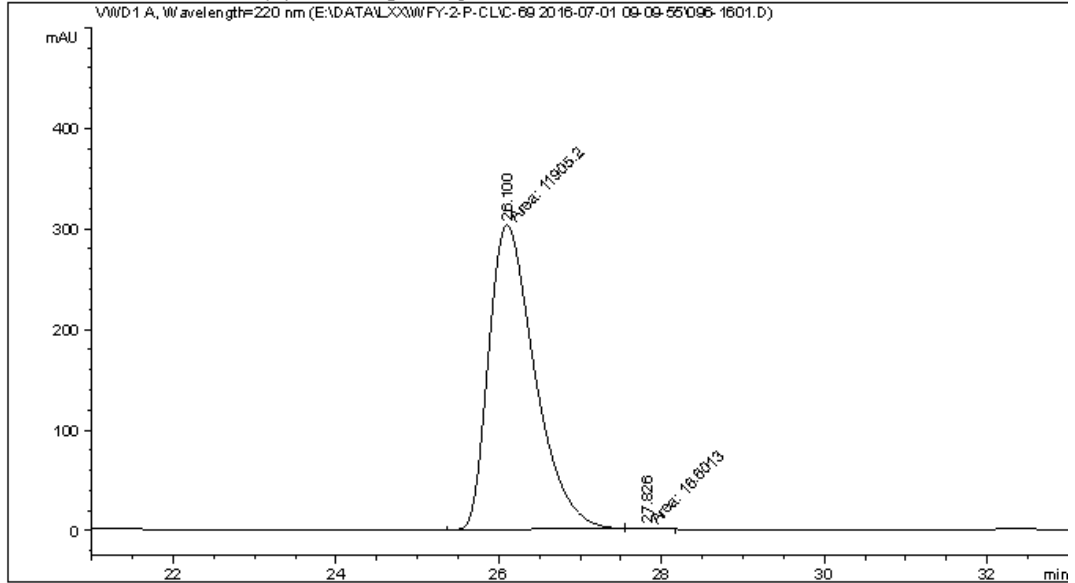

=====  
Area Percent Report  
=====

Sorted By : Signal  
Multiplier : 1.0000  
Dilution : 1.0000  
Do not use Multiplier & Dilution Factor with ISTDs

Signal 1: VWD1 A, Wavelength=220 nm

| Peak # | RetTime [min] | Type | Width [min] | Area [mAU*s] | Height [mAU] | Area %  |
|--------|---------------|------|-------------|--------------|--------------|---------|
| 1      | 26.100        | MM   | 0.6554      | 1.19052e4    | 302.75143    | 99.8607 |
| 2      | 27.826        | MM   | 0.3748      | 16.60127     | 7.38190e-1   | 0.1393  |

Totals : 1.19218e4 303.48962

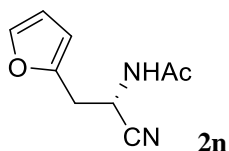

Data File E:\DATA\LXX\345-0CH3\C-77 2016-07-08 19-50-01\095-0901.D  
 Sample Name: Funan-Rac

```

=====
Acq. Operator   : SYSTEM                      Seq. Line :    9
Acq. Instrument : 1260HPLC-VWD                Location  : Vial 95
Injection Date  : 7/9/2016 12:12:21 AM        Inj       :    1
                                           Inj Volume: 3.000 µl
Acq. Method     : E:\DATA\LXX\345-0CH3\C-77 2016-07-08 19-50-01\VWD-AD(1-6)-95-5-1ML-3UL-
                  220-40MIN.M
Last changed    : 7/8/2016 7:50:02 PM by SYSTEM
Analysis Method : E:\DATA\LXX\345-0CH3\C-77 2016-07-08 19-50-01\VWD-AD(1-6)-95-5-1ML-3UL-
                  220-40MIN.M (Sequence Method)
Last changed    : 7/9/2016 8:20:04 AM by SYSTEM
                  (modified after loading)
Additional Info : Peak(s) manually integrated
  
```

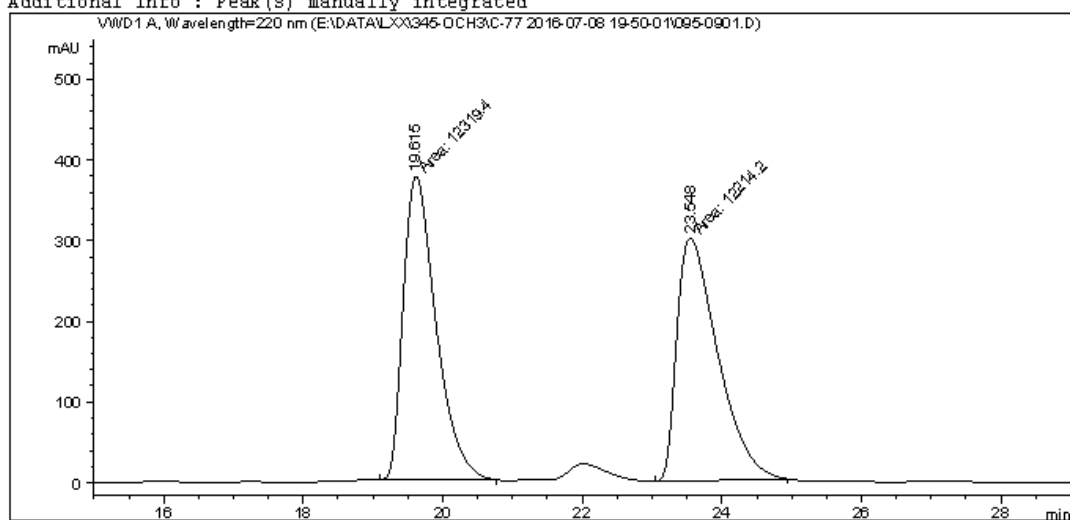

=====  
 Area Percent Report  
 =====

```

Sorted By      :      Signal
Multiplier     :      1.0000
Dilution      :      1.0000
Do not use Multiplier & Dilution Factor with ISTDs
  
```

Signal 1: VWD1 A, Wavelength=220 nm

| Peak # | RetTime [min] | Type | Width [min] | Area [mAU*s] | Height [mAU] | Area %  |
|--------|---------------|------|-------------|--------------|--------------|---------|
| 1      | 19.615        | MM   | 0.5457      | 1.23194e4    | 376.28650    | 50.2144 |
| 2      | 23.548        | MM   | 0.6764      | 1.22142e4    | 300.93906    | 49.7856 |

Totals :                    2.45335e4    677.22556

=====  
 \*\*\* End of Report \*\*\*

Data File E:\DATA\LXX\345-0CH3\C-77 2016-07-08 19-50-01\096-1001.D  
 Sample Name: C-77-3

```

=====
Acq. Operator   : SYSTEM                      Seq. Line :   10
Acq. Instrument : 1260HPLC-VWD                Location  : Vial 96
Injection Date  : 7/9/2016 12:53:07 AM       Inj       :    1
                                           Inj Volume: 3.000 µl
Acq. Method     : E:\DATA\LXX\345-0CH3\C-77 2016-07-08 19-50-01\VWD-AD(1-6)-95-5-1ML-3UL-
                220-40MIN.M
Last changed    : 7/8/2016 7:50:02 PM by SYSTEM
Analysis Method : E:\DATA\LXX\345-0CH3\C-77 2016-07-08 19-50-01\VWD-AD(1-6)-95-5-1ML-3UL-
                220-40MIN.M (Sequence Method)
Last changed    : 7/9/2016 8:18:38 AM by SYSTEM
                (modified after loading)
Additional Info : Peak(s) manually integrated
  
```

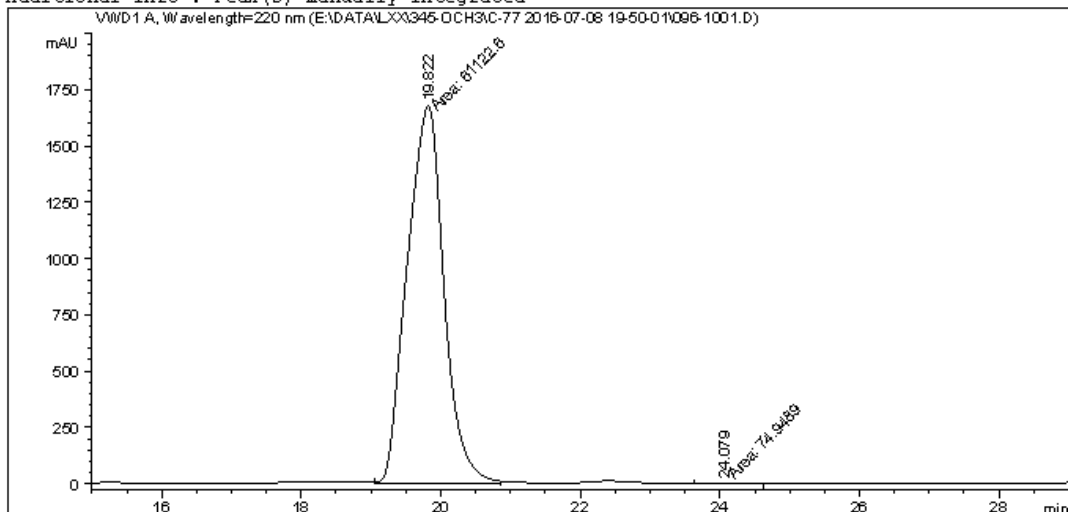

=====  
 Area Percent Report  
 =====

```

Sorted By      :      Signal
Multiplier     :      1.0000
Dilution       :      1.0000
Do not use Multiplier & Dilution Factor with ISTDs
  
```

Signal 1: VWD1 A, Wavelength=220 nm

| Peak # | RetTime [min] | Type | Width [min] | Area [mAU*s] | Height [mAU] | Area %  |
|--------|---------------|------|-------------|--------------|--------------|---------|
| 1      | 19.822        | MM   | 0.6077      | 6.11226e4    | 1676.25879   | 99.8775 |
| 2      | 24.079        | MM   | 0.5243      | 74.94890     | 2.38232      | 0.1225  |

Totals :                    6.11975e4 1678.64111

=====  
 \*\*\* End of Report \*\*\*

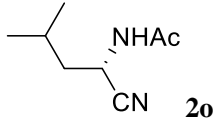

Data File E:\DATA\LXX\C-YIDING\C-90 2016-07-14 20-17-38\093-0501.D  
 Sample Name: C-89-1

```

=====
Acq. Operator   : SYSTEM                      Seq. Line :    5
Acq. Instrument : 1260HPLC-DAD                 Location  : Vial 93
Injection Date  : 7/14/2016 9:47:21 PM       Inj       :    1
                                           Inj Volume: 5.000 µl
Acq. Method     : E:\DATA\LXX\C-YIDING\C-90 2016-07-14 20-17-38\DAD-0J(1-6)-95-5-1.OML-5-
                  ALL-50MIN.M
Last changed    : 7/14/2016 8:54:13 PM by SYSTEM
Analysis Method : E:\DATA\LXX\C-YIDING\C-90 2016-07-14 20-17-38\DAD-0J(1-6)-95-5-1.OML-5-
                  ALL-50MIN.M (Sequence Method)
Last changed    : 7/15/2016 8:24:38 AM by SYSTEM
                  (modified after loading)
Additional Info : Peak(s) manually integrated
  
```

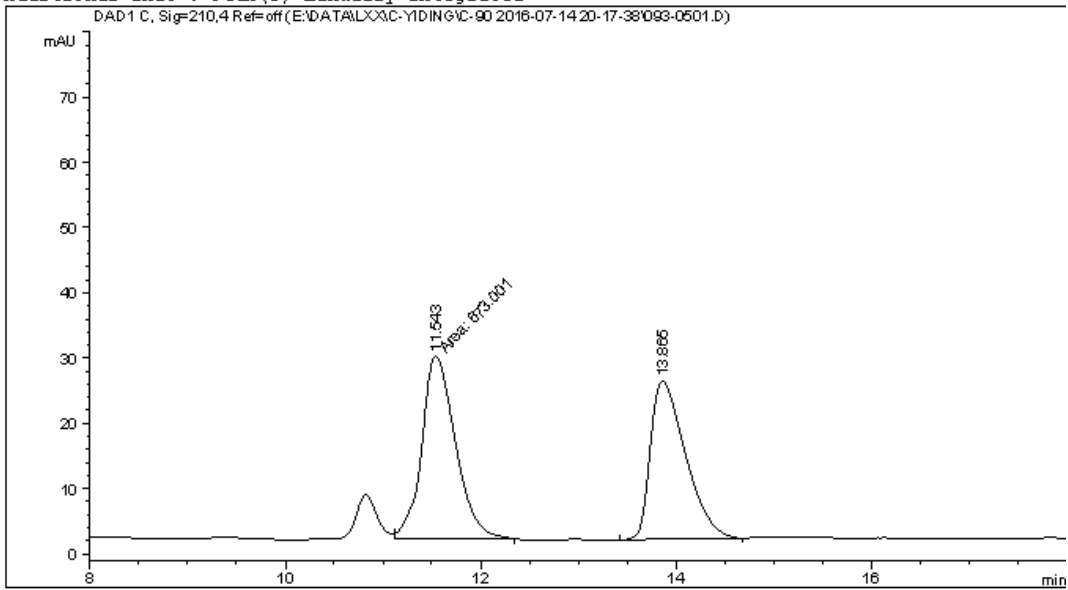

```

=====
                          Area Percent Report
=====
  
```

```

Sorted By       :      Signal
Multiplier      :      1.0000
Dilution        :      1.0000
Do not use Multiplier & Dilution Factor with ISTDs
  
```

Signal 1: DAD1 C, Sig=210,4 Ref=off

| Peak # | RetTime [min] | Type | Width [min] | Area [mAU*s] | Height [mAU] | Area %  |
|--------|---------------|------|-------------|--------------|--------------|---------|
| 1      | 11.543        | FM   | 0.4003      | 673.00104    | 28.01959     | 52.6637 |
| 2      | 13.865        | BB   | 0.3772      | 604.91992    | 24.23234     | 47.3363 |

Totals :                                    1277.92096    52.25193

```

=====
*** End of Report ***
  
```

=====  
Acq. Operator : SYSTEM Seq. Line : 6  
Acq. Instrument : 1260HPLC-DAD Location : Vial 95  
Injection Date : 7/14/2016 10:13:17 PM Inj : 1  
 Inj Volume: 5.000 µl  
Acq. Method : E:\DATA\LXX\C-YIDING\C-90 2016-07-14 20-17-38\DAD-0J(1-6)-95-5-1.OML-5-  
 ALL-50MIN.M  
Last changed : 7/14/2016 8:54:13 PM by SYSTEM  
Analysis Method : E:\DATA\LXX\C-YIDING\C-90 2016-07-14 20-17-38\DAD-0J(1-6)-95-5-1.OML-5-  
 ALL-50MIN.M (Sequence Method)  
Last changed : 7/15/2016 8:27:01 AM by SYSTEM  
 (modified after loading)  
Additional Info : Peak(s) manually integrated

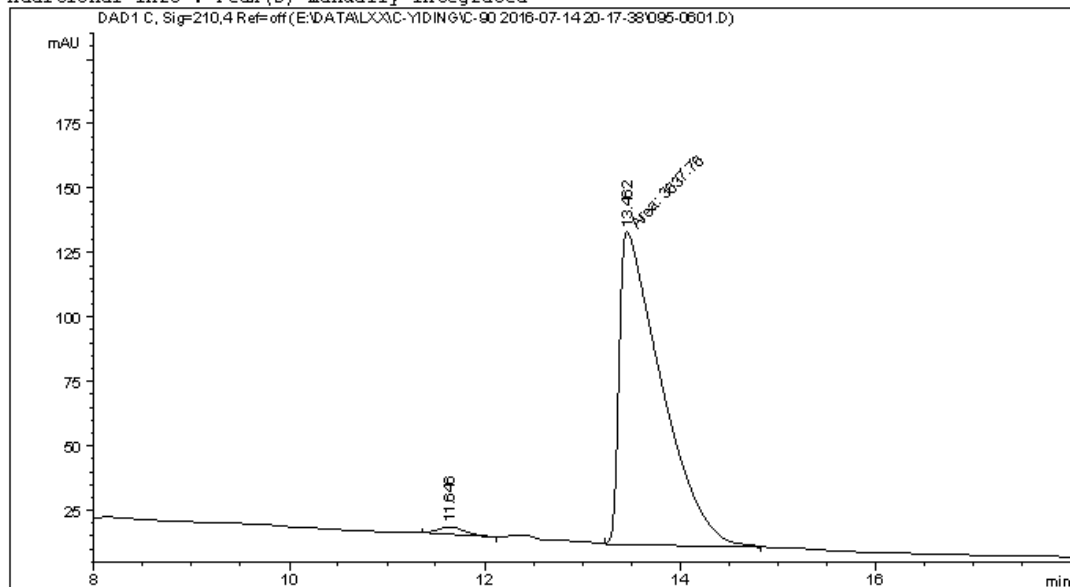

=====  
Area Percent Report  
=====

Sorted By : Signal  
Multiplier : 1.0000  
Dilution : 1.0000  
Do not use Multiplier & Dilution Factor with ISTDs

Signal 1: DAD1 C, Sig=210,4 Ref=off

| Peak # | RetTime [min] | Type | Width [min] | Area [mAU*s] | Height [mAU] | Area %  |
|--------|---------------|------|-------------|--------------|--------------|---------|
| 1      | 11.646        | BB   | 0.2710      | 52.73094     | 2.75852      | 1.4288  |
| 2      | 13.462        | MM   | 0.4996      | 3637.76001   | 121.35647    | 98.5712 |

Totals :                    3690.49095   124.11499

=====  
\*\*\* End of Report \*\*\*

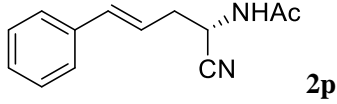

Data File E:\DATA\LXX\3-103-4\3-103-3 2016-09-18 10-00-11\093-0901.D  
 Sample Name: C-102-1-Rac

```

=====
Acq. Operator   : SYSTEM                      Seq. Line :    9
Acq. Instrument : 1260HPLC-VWD                 Location  : Vial 93
Injection Date  : 9/18/2016 2:52:15 PM        Inj       :    1
                                           Inj Volume: 3.000 µl
Acq. Method     : E:\DATA\LXX\3-103-4\3-103-3 2016-09-18 10-00-11\VWD-AD(1-6)-95-5-1ML-3UL
                                           -40MIN-220NM.M
Last changed    : 9/18/2016 10:00:11 AM by SYSTEM
Analysis Method : E:\DATA\LXX\3-103-4\3-103-3 2016-09-18 10-00-11\VWD-AD(1-6)-95-5-1ML-3UL
                                           -40MIN-220NM.M (Sequence Method)
Last changed    : 9/22/2016 7:55:02 PM by SYSTEM
                                           (modified after loading)
Additional Info : Peak(s) manually integrated
=====
  
```

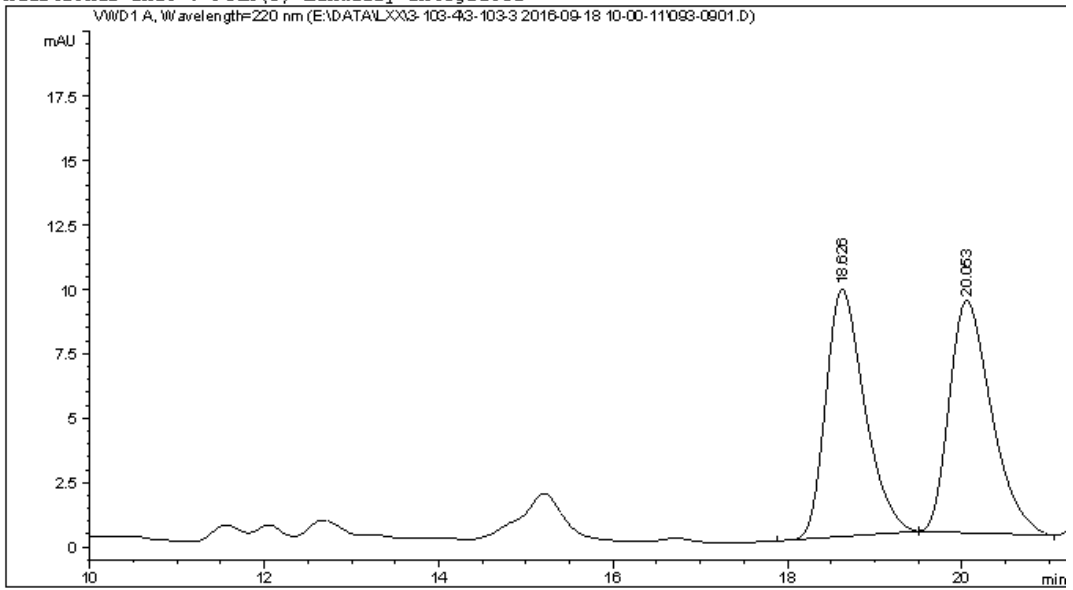

=====  
 Area Percent Report  
 =====

```

Sorted By      :      Signal
Multiplier     :      1.0000
Dilution       :      1.0000
Do not use Multiplier & Dilution Factor with ISTDs
  
```

Signal 1: VWD1 A, Wavelength=220 nm

| Peak # | RetTime [min] | Type | Width [min] | Area [mAU*s] | Height [mAU] | Area %  |
|--------|---------------|------|-------------|--------------|--------------|---------|
| 1      | 18.626        | BB   | 0.4686      | 296.65326    | 9.59833      | 49.4413 |
| 2      | 20.053        | BB   | 0.5121      | 303.35776    | 9.00392      | 50.5587 |

Totals :                                    600.01102    18.60225

=====  
 \*\*\* End of Report \*\*\*

```

=====
Acq. Operator   : SYSTEM                      Seq. Line :    7
Acq. Instrument : 1260HPLC-VWD                Location  : Vial 94
Injection Date  : 9/18/2016 1:30:46 PM       Inj       :    1
                                           Inj Volume: 3.000 µl
Acq. Method     : E:\DATA\LXX\3-103-4\3-103-3 2016-09-18 10-00-11\VWD-AD(1-6)-95-5-1ML-3UL
                  -40MIN-220NM.M
Last changed    : 9/18/2016 10:00:11 AM by SYSTEM
Analysis Method : E:\DATA\LXX\3-103-4\3-103-3 2016-09-18 10-00-11\VWD-AD(1-6)-95-5-1ML-3UL
                  -40MIN-220NM.M (Sequence Method)
Last changed    : 9/22/2016 7:53:19 PM by SYSTEM
                  (modified after loading)
Additional Info  : Peak(s) manually integrated
  
```

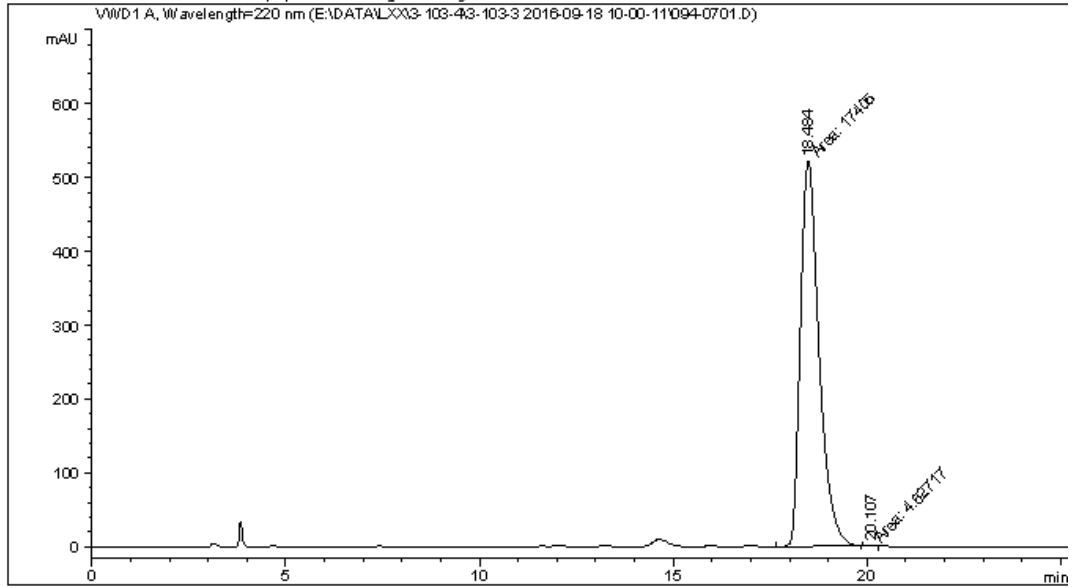

=====  
 Area Percent Report  
 =====

```

Sorted By      :      Signal
Multiplier     :      1.0000
Dilution      :      1.0000
Do not use Multiplier & Dilution Factor with ISTDs
  
```

Signal 1: VWD1 A, Wavelength=220 nm

| Peak # | RetTime [min] | Type | Width [min] | Area [mAU*s] | Height [mAU] | Area %  |
|--------|---------------|------|-------------|--------------|--------------|---------|
| 1      | 18.484        | MM   | 0.5561      | 1.74050e4    | 521.67749    | 99.9734 |
| 2      | 20.107        | MM   | 0.2456      | 4.62717      | 3.13968e-1   | 0.0266  |

Totals :                    1.74096e4    521.99146

=====  
 \*\*\* End of Report \*\*\*
